# Supplementary material for: In silico phylogenomics using complete genomes: a case study on the evolution of hominoids
Source: HighWire-hosted journal article supplement (doi:10.1101/gr.203950.115), 2016-07-19
Supplement: Supplemental_Table_S1.docx [file Supplemental_Table_S1.docx]

**Table S1.** Genome coordinates for 292 anonymous loci (AL) for the hominoids and physical distances to other anonymous loci and annotated genomic elements. ID = locus identification number; Chr # = human Chromosome number; Start = chromosome start position; End = chromosome end position; Dist. to previous AL = physical distance in base pairs between the anonymous locus and anonymous locus listed above; Dist. to closest gene = physical distance in base pairs between the anonymous locus and the nearest annotated genomic element; Closest gene = name of closest annotated genomic element.

| ID | Chr # | Start | End | Dist. to previous AL | Dist. to closest gene | Closest gene |
| --- | --- | --- | --- | --- | --- | --- |
| 1 | 1 | 68,744,514 | 68,745,513 | None | 229,845 | TXNP2 |
| 5 | 1 | 72,507,917 | 72,508,916 | 3,762,404 | 206,088 | RPL31P12 |
| 9 | 1 | 79,725,749 | 79,726,748 | 7,216,833 | 203,546 | ADH5P2 |
| 37 | 1 | 88,108,901 | 88,109,900 | 8,382,153 | 203,253 | CTA-21C21.1 |
| 50 | 1 | 104,474,803 | 104,475,802 | 16,364,903 | 320,973 | FTLP17 |
| 66 | 1 | 104,689,775 | 104,690,774 | 213,973 | 535,945 | FTLP17 |
| 84 | 1 | 104,974,914 | 104,975,913 | 284,140 | 458,081 | RP11-414B7.1 |
| 106 | 1 | 105,184,101 | 105,185,100 | 208,188 | 248,894 | RP11-414B7.1 |
| 114 | 1 | 106,289,093 | 106,290,092 | 1,103,993 | 207,714 | RP5-947P14.2 |
| 132 | 1 | 164,141,460 | 164,142,459 | 57,851,368 | 200,546 | NMNAT1P2 |
| 133 | 1 | 189,343,013 | 189,344,012 | 25,200,554 | 209,721 | GAPDHP75 |
| 146 | 1 | 191,440,464 | 191,441,463 | 2,096,452 | 219,152 | RP11-309H21.2 |
| 172 | 1 | 195,326,778 | 195,327,777 | 3,885,315 | 200,002 | AL357932.1 |
| 191 | 1 | 195,534,484 | 195,535,483 | 206,707 | 407,708 | AL357932.1 |
| 210 | 1 | 195,752,207 | 195,753,206 | 216,724 | 291,790 | RP11-476B1.1 |
| 219 | 10 | 9,508,281 | 9,509,280 | None | 212,683 | HSP90AB7P |
| 224 | 10 | 55,958,449 | 55,959,448 | 46,449,169 | 211,541 | RP11-478B11.2 |
| 253 | 10 | 56,838,042 | 56,839,041 | 878,594 | 242,011 | SNORD2 |
| 259 | 10 | 57,715,895 | 57,716,894 | 876,854 | 202,470 | RP11-550A9.1 |
| 271 | 10 | 81,424,322 | 81,425,321 | 23,707,428 | 279,591 | AL356154.1 |
| 286 | 10 | 81,658,264 | 81,659,263 | 232,943 | 216,051 | NRG3 |
| 289 | 10 | 111,724,861 | 111,725,860 | 30,065,598 | 225,920 | RP11-309P22.1 |
| 294 | 10 | 128,524,321 | 128,525,320 | 16,798,461 | 207,947 | RP11-264E18.1 |
| 347 | 10 | 130,727,396 | 130,728,395 | 2,202,076 | 222,195 | Y_RNA |
| 374 | 11 | 21,845,057 | 21,846,056 | None | 267,392 | CTD-2019O4.1 |
| 383 | 11 | 36,910,115 | 36,911,114 | 15,064,059 | 212,248 | CTD-2119L1.1 |
| 397 | 11 | 37,495,524 | 37,496,523 | 584,410 | 205,602 | SNORA31 |
| 398 | 11 | 38,884,861 | 38,885,860 | 1,388,338 | 229,609 | RP11-64I17.1 |
| 405 | 11 | 39,465,300 | 39,466,299 | 579,440 | 204,087 | RNU6-99P |
| 410 | 11 | 42,463,677 | 42,464,676 | 2,997,378 | 248,691 | CTD-2572N17.1 |
| 434 | 11 | 42,665,603 | 42,666,602 | 200,927 | 273,173 | CTD-2537L20.1 |
| 439 | 11 | 81,337,312 | 81,338,311 | 38,670,710 | 213,915 | RP11-664H7.1 |
| 444 | 11 | 91,385,993 | 91,386,992 | 10,047,682 | 218,699 | RP11-699F16.2 |
| 463 | 11 | 114,918,045 | 114,919,044 | 23,531,053 | 209,174 | ACA59 |
| 465 | 11 | 116,164,046 | 116,165,045 | 1,245,002 | 212,555 | AP000797.2 |
| 484 | 12 | 60,626,720 | 60,627,719 | None | 207,427 | RP11-154D9.1 |
| 498 | 12 | 60,835,126 | 60,836,125 | 207,407 | 395,034 | RP11-471N19.1 |
| 519 | 12 | 73,426,393 | 73,427,392 | 12,590,268 | 221,274 | RP11-166B14.1 |
| 526 | 12 | 83,386,945 | 83,387,944 | 9,959,553 | 214,205 | RP11-87P13.2 |
| 540 | 12 | 83,931,107 | 83,932,106 | 543,163 | 251,218 | SNORA3 |
| 546 | 12 | 87,382,934 | 87,383,933 | 3,450,828 | 212,505 | RPL23AP68 |
| 554 | 13 | 22,482,509 | 22,483,508 | None | 212,515 | FTH1P7 |
| 560 | 13 | 55,793,867 | 55,794,866 | 33,310,359 | 204,334 | HNF4GP1 |
| 567 | 13 | 56,484,628 | 56,485,627 | 689,762 | 267,686 | SPATA2P1 |
| 585 | 13 | 64,296,706 | 64,297,705 | 7,811,079 | 309,667 | LINC00355 |
| 614 | 13 | 65,510,955 | 65,511,954 | 1,213,250 | 200,434 | STARP1 |
| 621 | 13 | 72,179,360 | 72,180,359 | 6,667,406 | 201,154 | RNA5SP32 |
| 631 | 13 | 76,351,053 | 76,352,052 | 4,170,694 | 215,828 | RN7SL571P |
| 664 | 13 | 76,597,135 | 76,598,134 | 245,083 | 282,032 | KCTD12 |
| 679 | 13 | 80,132,695 | 80,133,694 | 3,534,561 | 202,282 | SPRY2 |
| 683 | 13 | 81,931,238 | 81,932,237 | 1,797,544 | 240,838 | PTMAP5 |
| 704 | 13 | 82,143,317 | 82,144,316 | 211,080 | 452,917 | PTMAP5 |
| 727 | 13 | 82,490,030 | 82,491,029 | 345,714 | 332,102 | GYG1P2 |
| 742 | 13 | 83,507,578 | 83,508,577 | 1,016,549 | 209,411 | RNU6-67P |
| 760 | 13 | 84,227,523 | 84,228,522 | 718,946 | 206,761 | UBE2D3P4 |
| 773 | 13 | 84,799,327 | 84,800,326 | 570,805 | 236,091 | LINC00333 |
| 782 | 13 | 86,488,112 | 86,489,111 | 1,687,786 | 210,850 | DDX6P2 |
| 784 | 13 | 103,650,785 | 103,651,784 | 17,161,674 | 205,817 | ATP6V1G1P7 |
| 824 | 13 | 103,876,341 | 103,877,340 | 224,557 | 431,373 | ATP6V1G1P7 |
| 860 | 13 | 104,089,410 | 104,090,409 | 212,070 | 644,442 | ATP6V1G1P7 |
| 892 | 13 | 104,295,286 | 104,296,285 | 204,877 | 518,042 | RPL7P45 |
| 923 | 13 | 104,498,915 | 104,499,914 | 202,630 | 314,413 | RPL7P45 |
| 944 | 13 | 105,015,903 | 105,016,902 | 515,989 | 200,834 | RPL7P45 |
| 977 | 13 | 105,232,394 | 105,233,393 | 215,492 | 225,662 | DAOA-AS1 |
| 996 | 14 | 39,737,967 | 39,738,966 | None | 224,188 | RP11-111A21.1 |
| 1023 | 14 | 39,973,727 | 39,974,726 | 234,761 | 411,526 | RP11-662J14.1 |
| 1050 | 14 | 40,602,287 | 40,603,286 | 627,561 | 213,147 | RP11-662J14.2 |
| 1067 | 14 | 83,271,762 | 83,272,761 | 42,668,476 | 223,122 | RNU7-51P |
| 1086 | 14 | 83,474,393 | 83,475,392 | 201,632 | 274,992 | RNU6ATAC28P |
| 1098 | 14 | 84,399,968 | 84,400,967 | 924,576 | 222,880 | CTD-2320B12.2 |
| 1122 | 14 | 86,632,388 | 86,633,387 | 2,231,421 | 231,103 | RP11-26L16.1 |
| 1182 | 16 | 61,262,633 | 61,263,632 | None | 206,719 | RP11-51O6.1 |
| 1210 | 17 | 54,172,340 | 54,173,339 | None | 217,016 | RP11-618P13.1 |
| 1222 | 18 | 25,563,441 | 25,564,440 | None | 253,794 | RN7SL97P |
| 1233 | 18 | 28,395,826 | 28,396,825 | 2,831,386 | 249,123 | RP11-430E17.1 |
| 1240 | 18 | 30,143,273 | 30,144,272 | 1,746,448 | 214,565 | AC013660.1 |
| 1272 | 18 | 30,353,880 | 30,354,879 | 209,608 | 358,396 | RP11-675P14.1 |
| 1290 | 18 | 37,895,673 | 37,896,672 | 7,540,794 | 222,497 | RP11-19F9.1 |
| 1324 | 18 | 38,097,851 | 38,098,850 | 201,179 | 424,675 | RP11-19F9.1 |
| 1343 | 18 | 38,308,754 | 38,309,753 | 209,904 | 345,456 | RP11-687D19.1 |
| 1364 | 18 | 40,349,006 | 40,350,005 | 2,039,253 | 204,710 | RPL17P45 |
| 1405 | 18 | 40,556,148 | 40,557,147 | 206,143 | 411,852 | RPL17P45 |
| 1433 | 18 | 40,772,662 | 40,773,661 | 215,515 | 628,366 | RPL17P45 |
| 1467 | 18 | 41,024,413 | 41,025,412 | 250,752 | 440,371 | KC6 |
| 1493 | 18 | 41,226,829 | 41,227,828 | 201,417 | 237,955 | KC6 |
| 1501 | 18 | 43,540,271 | 43,541,270 | 2,312,443 | 265,877 | SYT4 |
| 1517 | 18 | 52,113,203 | 52,114,202 | 8,571,933 | 222,159 | RP11-25O3.1 |
| 1519 | 18 | 53,837,849 | 53,838,848 | 1,723,647 | 232,124 | RPL29P32 |
| 1528 | 18 | 61,127,278 | 61,128,277 | 7,288,430 | 205,305 | CDH20 |
| 1531 | 18 | 64,883,353 | 64,884,352 | 3,755,076 | 205,360 | RP11-762J3.1 |
| 1533 | 18 | 66,281,153 | 66,282,152 | 1,396,801 | 211,506 | PRPF19P1 |
| 1537 | 18 | 72,159,816 | 72,160,815 | 5,877,664 | 227,020 | RP11-736G13.2 |
| 1553 | 2 | 13,219,366 | 13,220,365 | None | 215,415 | AC064875.2 |
| 1564 | 2 | 35,997,192 | 35,998,191 | 22,776,827 | 272,050 | MRPL50P1 |
| 1583 | 2 | 41,375,562 | 41,376,561 | 5,377,371 | 218,007 | HNRNPA1P57 |
| 1591 | 2 | 49,498,606 | 49,499,605 | 8,122,045 | 264,707 | RNU6-439P |
| 1618 | 2 | 53,114,436 | 53,115,435 | 3,614,831 | 230,981 | AC010967.1 |
| 1642 | 2 | 116,115,936 | 116,116,935 | 63,000,501 | 570,283 | RP11-338I24.1 |
| 1655 | 2 | 116,330,528 | 116,331,527 | 213,593 | 355,691 | RP11-338I24.1 |
| 1670 | 2 | 117,411,742 | 117,412,741 | 1,080,215 | 230,567 | AC092170.1 |
| 1685 | 2 | 118,431,064 | 118,432,063 | 1,018,323 | 247,742 | AC093901.1 |
| 1715 | 2 | 122,000,479 | 122,001,478 | 3,568,416 | 205,560 | AC018737.3 |
| 1728 | 2 | 122,203,140 | 122,204,139 | 201,662 | 408,221 | AC018737.3 |
| 1749 | 2 | 122,413,752 | 122,414,751 | 209,613 | 618,833 | AC018737.3 |
| 1771 | 2 | 122,632,078 | 122,633,077 | 217,327 | 432,244 | AC062020.2 |
| 1783 | 2 | 122,861,233 | 122,862,232 | 228,156 | 203,089 | AC062020.2 |
| 1785 | 2 | 125,207,247 | 125,208,246 | 2,345,015 | 217,922 | RNU6-259P |
| 1804 | 2 | 125,408,870 | 125,409,869 | 200,624 | 301,100 | AC097499.1 |
| 1812 | 2 | 128,787,322 | 128,788,321 | 3,377,453 | 206,673 | AC012451.1 |
| 1823 | 2 | 133,802,185 | 133,803,184 | 5,013,864 | 205,786 | RN7SKP93 |
| 1832 | 2 | 139,144,319 | 139,145,318 | 5,341,135 | 220,847 | AC062021.1 |
| 1834 | 2 | 147,101,848 | 147,102,847 | 7,956,530 | 203,630 | AC062032.1 |
| 1847 | 2 | 155,543,931 | 155,544,930 | 8,441,084 | 213,404 | RNU6-546P |
| 1882 | 2 | 155,755,037 | 155,756,036 | 210,107 | 255,581 | AC093375.1 |
| 1891 | 2 | 180,240,600 | 180,241,599 | 24,484,564 | 231,538 | RP11-512G4.1 |
| 1894 | 2 | 184,174,075 | 184,175,074 | 3,932,476 | 203,901 | MIR548AE1 |
| 1898 | 2 | 185,164,829 | 185,165,828 | 989,755 | 262,267 | AC010747.2 |
| 1915 | 2 | 192,405,374 | 192,406,373 | 7,239,546 | 223,546 | AC013401.1 |
| 1924 | 2 | 192,995,547 | 192,996,546 | 589,174 | 219,474 | PCGEM1 |
| 1930 | 2 | 193,482,992 | 193,483,991 | 486,446 | 205,378 | AC092638.2 |
| 1936 | 2 | 195,241,727 | 195,242,726 | 1,757,736 | 205,806 | AC064834.1 |
| 1937 | 2 | 210,880,132 | 210,881,131 | 15,637,406 | 201,025 | CPS1 |
| 1940 | 2 | 226,422,985 | 226,423,984 | 15,541,854 | 234,726 | MIR5702 |
| 1945 | 20 | 12,581,284 | 12,582,283 | None | 200,029 | PA2G4P2 |
| 2035 | 20 | 39,552,847 | 39,553,846 | 26,970,564 | 203,455 | Metazoa_SRP |
| 2041 | 20 | 55,782,618 | 55,783,617 | 16,228,772 | 213,823 | CBLN4 |
| 2075 | 3 | 5,463,141 | 5,464,140 | None | 207,326 | AC026202.5 |
| 2089 | 3 | 5,677,111 | 5,678,110 | 212,971 | 284,732 | AC027119.1 |
| 2095 | 3 | 20,723,443 | 20,724,442 | 15,045,333 | 215,687 | RNU6-815P |
| 2110 | 3 | 20,930,151 | 20,931,150 | 205,709 | 207,113 | AC104441.1 |
| 2112 | 3 | 70,512,728 | 70,513,727 | 49,581,578 | 237,396 | COX6CP6 |
| 2118 | 3 | 74,764,327 | 74,765,326 | 4,250,600 | 229,456 | AC128653.1 |
| 2131 | 3 | 83,010,946 | 83,011,945 | 8,245,620 | 202,925 | CYP51A1P1 |
| 2161 | 3 | 83,238,486 | 83,239,485 | 226,541 | 430,465 | CYP51A1P1 |
| 2179 | 3 | 83,462,181 | 83,463,180 | 222,696 | 473,865 | SRRM1P2 |
| 2203 | 3 | 83,673,788 | 83,674,787 | 210,608 | 262,258 | SRRM1P2 |
| 2211 | 3 | 89,792,169 | 89,793,168 | 6,117,382 | 202,072 | RP11-91A15.1 |
| 2239 | 3 | 94,708,276 | 94,709,275 | 4,915,108 | 200,656 | ARMC10P1 |
| 2246 | 3 | 95,396,204 | 95,397,203 | 686,929 | 223,827 | RPS18P6 |
| 2256 | 3 | 95,897,114 | 95,898,113 | 499,911 | 228,349 | MTHFD2P1 |
| 2265 | 3 | 103,847,850 | 103,848,849 | 7,949,737 | 205,859 | AC016970.1 |
| 2266 | 3 | 104,297,795 | 104,298,794 | 448,946 | 203,906 | RP11-281P11.1 |
| 2267 | 3 | 106,069,554 | 106,070,553 | 1,770,760 | 201,963 | CBLB |
| 2272 | 3 | 110,185,193 | 110,186,192 | 4,114,640 | 207,426 | RP11-696F10.1 |
| 2287 | 3 | 117,339,812 | 117,340,811 | 7,153,620 | 203,394 | RNU6-1200P |
| 2289 | 3 | 135,672,541 | 135,673,540 | 18,331,730 | 252,351 | RP11-237P21.1 |
| 2293 | 3 | 137,217,173 | 137,218,172 | 1,543,633 | 257,621 | IL20RB-AS1 |
| 2308 | 3 | 144,404,890 | 144,405,889 | 7,186,718 | 217,870 | RNA5SP144 |
| 2328 | 3 | 144,605,905 | 144,606,904 | 200,016 | 418,885 | RNA5SP144 |
| 2352 | 3 | 144,823,203 | 144,824,202 | 216,299 | 636,183 | RNA5SP144 |
| 2378 | 3 | 145,091,788 | 145,092,787 | 267,586 | 430,751 | LARP7P4 |
| 2402 | 3 | 145,304,167 | 145,305,166 | 211,380 | 218,372 | LARP7P4 |
| 2406 | 3 | 162,026,067 | 162,027,066 | 16,720,901 | 208,888 | RP11-774I5.1 |
| 2437 | 3 | 162,235,127 | 162,236,126 | 208,061 | 250,415 | TOMM22P6 |
| 2450 | 3 | 163,764,888 | 163,765,887 | 1,528,762 | 235,719 | RP11-208P4.1 |
| 2454 | 3 | 164,405,624 | 164,406,623 | 639,737 | 234,068 | MIR1263 |
| 2464 | 3 | 176,351,409 | 176,352,408 | 11,944,786 | 236,872 | RP11-78E6.1 |
| 2473 | 4 | 10,943,393 | 10,944,392 | None | 245,732 | RP11-61G19.1 |
| 2484 | 4 | 18,247,486 | 18,248,485 | 7,303,094 | 239,577 | RP11-608B3.1 |
| 2487 | 4 | 18,689,510 | 18,690,509 | 441,025 | 201,137 | RP11-608B3.1 |
| 2496 | 4 | 18,891,698 | 18,892,697 | 201,189 | 279,638 | RP11-3J1.1 |
| 2507 | 4 | 24,114,292 | 24,115,291 | 5,221,595 | 305,885 | AC092846.1 |
| 2522 | 4 | 30,223,068 | 30,224,067 | 6,107,777 | 216,018 | RP11-174E22.2 |
| 2539 | 4 | 30,434,197 | 30,435,196 | 210,130 | 285,219 | PCDH7 |
| 2552 | 4 | 32,564,007 | 32,565,006 | 2,128,811 | 210,787 | RP11-240A16.1 |
| 2574 | 4 | 32,765,487 | 32,766,486 | 200,481 | 244,462 | RP11-141P6.1 |
| 2582 | 4 | 35,175,679 | 35,176,678 | 2,409,193 | 209,335 | snoU13 |
| 2595 | 4 | 45,732,389 | 45,733,388 | 10,555,711 | 252,253 | RNU6-931P |
| 2605 | 4 | 60,037,725 | 60,038,724 | 14,304,337 | 203,558 | RNU6-1325P |
| 2620 | 4 | 60,239,987 | 60,240,986 | 201,263 | 405,820 | RNU6-1325P |
| 2646 | 4 | 60,453,282 | 60,454,281 | 212,296 | 209,668 | AC095061.1 |
| 2648 | 4 | 63,695,828 | 63,696,827 | 3,241,547 | 226,883 | RP11-12K22.1 |
| 2667 | 4 | 63,907,629 | 63,908,628 | 210,802 | 366,629 | TECRL |
| 2686 | 4 | 67,106,369 | 67,107,368 | 3,197,741 | 208,998 | RNU6-699P |
| 2700 | 4 | 114,310,805 | 114,311,804 | 47,203,437 | 206,580 | RP11-362M19.1 |
| 2715 | 4 | 115,347,616 | 115,348,615 | 1,035,812 | 204,313 | MRPS33P3 |
| 2725 | 4 | 124,935,714 | 124,936,713 | 9,587,099 | 268,200 | ANKRD50 |
| 2746 | 4 | 126,314,160 | 126,315,159 | 1,377,447 | 207,832 | RP11-318I4.2 |
| 2756 | 4 | 126,783,057 | 126,784,056 | 467,898 | 218,281 | RBM48P1 |
| 2761 | 4 | 129,505,308 | 129,506,307 | 2,721,252 | 205,674 | RP11-419L4.1 |
| 2768 | 4 | 130,169,222 | 130,170,221 | 662,915 | 206,008 | RP11-521E5.1 |
| 2784 | 4 | 160,183,891 | 160,184,890 | 30,013,670 | 336,939 | RP11-502M1.1 |
| 2835 | 4 | 180,211,863 | 180,212,862 | 20,026,973 | 354,282 | RP11-774G5.1 |
| 2866 | 5 | 2,472,579 | 2,473,578 | None | 210,556 | RP11-24P24.1 |
| 2886 | 5 | 3,803,204 | 3,804,203 | 1,329,626 | 206,936 | CTD-2012M11.3 |
| 2888 | 5 | 5,725,675 | 5,726,674 | 1,921,472 | 209,631 | AC026799.1 |
| 2903 | 5 | 27,734,213 | 27,735,212 | 22,007,539 | 249,027 | LINC01021 |
| 2909 | 5 | 30,581,507 | 30,582,506 | 2,846,295 | 215,823 | RP11-136H13.2 |
| 2930 | 5 | 30,791,717 | 30,792,716 | 209,211 | 260,849 | RPL19P11 |
| 2948 | 5 | 51,676,814 | 51,677,813 | 20,884,098 | 208,875 | RNA5SP182 |
| 2952 | 5 | 63,523,959 | 63,524,958 | 11,846,146 | 221,903 | CTD-2049O17.1 |
| 2974 | 5 | 63,749,100 | 63,750,099 | 224,142 | 207,794 | RP11-158J3.2 |
| 2976 | 5 | 84,706,636 | 84,707,635 | 20,956,537 | 292,285 | RP11-509M23.1 |
| 2995 | 5 | 87,949,953 | 87,950,952 | 3,242,318 | 236,645 | CTD-2316B1.2 |
| 3003 | 5 | 99,241,732 | 99,242,731 | 11,290,780 | 246,828 | RP11-93O17.1 |
| 3015 | 5 | 103,813,829 | 103,814,828 | 4,571,098 | 253,579 | NUDT12 |
| 3023 | 5 | 105,633,320 | 105,634,319 | 1,818,492 | 288,675 | RNA5SP189 |
| 3032 | 5 | 106,129,658 | 106,130,657 | 495,339 | 206,550 | RNA5SP189 |
| 3040 | 5 | 110,086,427 | 110,087,426 | 3,955,770 | 201,004 | PGAM5P1 |
| 3041 | 5 | 113,824,045 | 113,825,044 | 3,736,619 | 230,962 | RP11-371M22.1 |
| 3046 | 5 | 119,917,448 | 119,918,447 | 6,092,404 | 236,368 | CTC-507E12.1 |
| 3060 | 5 | 123,845,234 | 123,846,233 | 3,926,787 | 207,831 | KRT18P16 |
| 3077 | 5 | 144,751,618 | 144,752,617 | 20,905,385 | 215,948 | RN7SKP246 |
| 3082 | 5 | 166,598,000 | 166,598,999 | 21,845,383 | 215,401 | CTB-63M22.1 |
| 3093 | 6 | 9,378,117 | 9,379,116 | None | 216,994 | OFCC1 |
| 3097 | 6 | 18,780,959 | 18,781,958 | 9,401,843 | 209,079 | MIR548A1 |
| 3117 | 6 | 48,415,235 | 48,416,234 | 29,633,277 | 200,441 | RBMXP1 |
| 3138 | 6 | 66,315,472 | 66,316,471 | 17,899,238 | 220,563 | NUFIP1P |
| 3160 | 6 | 66,933,522 | 66,934,521 | 617,051 | 204,618 | RNU7-66P |
| 3163 | 6 | 76,986,504 | 76,987,503 | 10,051,983 | 210,644 | RP11-354K4.2 |
| 3183 | 6 | 78,164,459 | 78,165,458 | 1,176,956 | 237,485 | MEI4 |
| 3200 | 6 | 78,390,820 | 78,391,819 | 225,362 | 212,648 | RP3-390M24.1 |
| 3204 | 6 | 80,763,831 | 80,764,830 | 2,372,012 | 206,642 | RP11-486E2.1 |
| 3221 | 6 | 80,988,597 | 80,989,596 | 223,767 | 431,408 | RP11-486E2.1 |
| 3243 | 6 | 81,229,063 | 81,230,062 | 239,467 | 261,377 | FAM46A |
| 3249 | 6 | 82,578,541 | 82,579,540 | 1,348,479 | 211,124 | TPBG |
| 3263 | 6 | 90,793,821 | 90,794,820 | 8,214,281 | 277,321 | MAP3K7 |
| 3304 | 6 | 90,996,462 | 90,997,461 | 201,642 | 392,852 | RP1-177I10.1 |
| 3339 | 6 | 93,652,222 | 93,653,221 | 2,654,761 | 225,885 | SNORA18 |
| 3342 | 6 | 94,649,346 | 94,650,345 | 996,125 | 202,167 | RP3-399J4.1 |
| 3358 | 6 | 94,858,271 | 94,859,270 | 207,926 | 411,092 | RP3-399J4.1 |
| 3376 | 6 | 95,095,367 | 95,096,366 | 236,097 | 407,816 | CYCSP17 |
| 3415 | 6 | 101,107,652 | 101,108,651 | 6,011,286 | 217,314 | RP3-467N11.2 |
| 3425 | 6 | 103,207,185 | 103,208,184 | 2,098,534 | 203,288 | RP1-76C18.1 |
| 3443 | 6 | 103,798,086 | 103,799,085 | 589,902 | 214,818 | SNORA33 |
| 3446 | 6 | 104,226,765 | 104,227,764 | 427,680 | 200,513 | NPM1P10 |
| 3473 | 6 | 104,433,238 | 104,434,237 | 205,474 | 253,004 | RP11-427E4.1 |
| 3481 | 6 | 115,094,761 | 115,095,760 | 10,660,524 | 227,785 | RNU6-475P |
| 3487 | 6 | 119,549,763 | 119,550,762 | 4,454,003 | 222,378 | RNU6-194P |
| 3519 | 6 | 119,763,691 | 119,764,690 | 212,929 | 250,489 | MIR3144 |
| 3523 | 6 | 126,885,903 | 126,886,902 | 7,121,213 | 202,056 | RPS4XP9 |
| 3530 | 6 | 141,846,722 | 141,847,721 | 14,959,820 | 210,219 | RPS3AP23 |
| 3534 | 6 | 145,061,120 | 145,062,119 | 3,213,399 | 286,639 | AL356739.1 |
| 3546 | 6 | 156,146,881 | 156,147,880 | 11,084,762 | 200,002 | MIR1202 |
| 3556 | 7 | 41,359,684 | 41,360,683 | None | 226,177 | AC005022.1 |
| 3573 | 7 | 42,451,678 | 42,452,677 | 1,090,995 | 209,049 | AC027269.2 |
| 3577 | 7 | 49,468,643 | 49,469,642 | 7,015,966 | 208,797 | RP11-122G11.1 |
| 3589 | 7 | 52,474,207 | 52,475,206 | 3,004,565 | 204,638 | SNORA31 |
| 3625 | 7 | 52,690,817 | 52,691,816 | 215,611 | 200,021 | RP11-398K14.1 |
| 3661 | 7 | 85,888,782 | 85,889,781 | 33,196,966 | 252,438 | AC092013.1 |
| 3671 | 7 | 86,423,453 | 86,424,452 | 533,672 | 205,720 | SOCS5P1 |
| 3677 | 7 | 113,632,664 | 113,633,663 | 27,208,212 | 216,342 | RP11-703P11.1 |
| 3681 | 7 | 118,671,413 | 118,672,412 | 5,037,750 | 207,691 | GTF3AP6 |
| 3683 | 7 | 125,669,627 | 125,670,626 | 6,997,215 | 207,758 | RP11-807H17.1 |
| 3686 | 7 | 145,883,492 | 145,884,491 | 20,212,866 | 207,200 | AC006007.1 |
| 3694 | 8 | 76,000,407 | 76,001,406 | None | 213,947 | AC016194.1 |
| 3707 | 8 | 77,781,402 | 77,782,401 | 1,779,996 | 305,021 | RP11-38H17.1 |
| 3727 | 8 | 83,659,161 | 83,660,160 | 5,876,760 | 250,261 | RP11-51M18.1 |
| 3737 | 8 | 89,010,429 | 89,011,428 | 5,350,269 | 201,521 | RP11-642C5.1 |
| 3741 | 8 | 114,534,601 | 114,535,600 | 25,523,173 | 215,690 | RP11-393K19.1 |
| 3749 | 8 | 114,992,073 | 114,993,072 | 456,473 | 200,144 | CARSP2 |
| 3761 | 8 | 141,723,200 | 141,724,199 | 26,730,128 | 204,463 | AC138647.1 |
| 3766 | 9 | 1,536,428 | 1,537,427 | None | 202,475 | RNA5SP279 |
| 3783 | 9 | 1,743,015 | 1,744,014 | 205,588 | 233,770 | RP11-443B9.1 |
| 3789 | 9 | 11,850,793 | 11,851,792 | 10,106,779 | 232,172 | RP11-32D4.1 |
| 3794 | 9 | 13,705,376 | 13,706,375 | 1,853,584 | 217,865 | RP11-536O18.1 |
| 3800 | 9 | 18,009,516 | 18,010,515 | 4,303,141 | 350,082 | RP11-570H19.2 |
| 3830 | 9 | 23,189,453 | 23,190,452 | 5,178,938 | 236,350 | AL391117.1 |
| 3860 | 9 | 23,412,105 | 23,413,104 | 221,653 | 219,002 | SUMO2P2 |
| 3863 | 9 | 24,157,509 | 24,158,508 | 744,405 | 201,065 | RP11-321L2.3 |
| 3882 | 9 | 25,351,936 | 25,352,935 | 1,193,428 | 262,785 | RN7SKP120 |
| 3890 | 9 | 26,382,945 | 26,383,944 | 1,030,010 | 204,456 | AL356791.2 |
| 3896 | 9 | 30,093,346 | 30,094,345 | 3,709,402 | 266,635 | ME2P1 |
| 3922 | 9 | 30,356,760 | 30,357,759 | 262,415 | 201,121 | SLC4A1APP1 |
| 3923 | 9 | 31,849,777 | 31,850,776 | 1,492,018 | 204,617 | HMGB3P23 |
| 3940 | 9 | 32,072,305 | 32,073,304 | 221,529 | 220,254 | RNA5SP281 |
| 3955 | 9 | 74,083,427 | 74,084,426 | 42,010,123 | 212,503 | RP11-401G5.1 |
| 3964 | 9 | 81,075,848 | 81,076,847 | 6,991,422 | 205,485 | RP11-289F5.1 |
| 3975 | 9 | 118,356,705 | 118,357,704 | 37,279,858 | 273,323 | TPT1P9 |
| 3989 | 9 | 119,729,136 | 119,730,135 | 1,371,432 | 204,918 | RP11-360A18.2 |
| 4019 | X | 7,624,243 | 7,625,242 | None | 217,020 | VCX |
| 4024 | X | 20,680,056 | 20,681,055 | 13,054,814 | 227,625 | RN7SKP183 |
| 4036 | X | 20,896,970 | 20,897,969 | 215,915 | 316,668 | RNU6-133P |
| 4043 | X | 35,320,455 | 35,321,454 | 14,422,486 | 260,481 | RP11-504E21.1 |
| 4050 | X | 66,898,623 | 66,899,622 | 31,577,169 | 222,259 | RNU6-394P |
| 4057 | X | 67,104,152 | 67,105,151 | 204,530 | 268,422 | RP6-22P16.1 |
| 4062 | X | 79,697,749 | 79,698,748 | 12,592,598 | 316,008 | TBX22 |
| 4066 | X | 82,207,815 | 82,208,814 | 2,509,067 | 206,488 | RNU6-974P |
| 4072 | X | 83,274,809 | 83,275,808 | 1,065,995 | 232,442 | POU3F4 |
| 4075 | X | 85,589,655 | 85,590,654 | 2,313,847 | 258,756 | RP1-93L7.3 |
| 4087 | X | 91,096,066 | 91,097,065 | 5,505,412 | 210,716 | RP13-212L9.1 |
| 4110 | X | 98,888,588 | 98,889,587 | 7,791,523 | 465,779 | HMGB1P32 |
| 4135 | X | 99,170,074 | 99,171,073 | 280,487 | 214,122 | AL109750.1 |
| 4138 | X | 117,612,134 | 117,613,133 | 18,441,061 | 212,053 | RP3-378P9.2 |
| 4143 | X | 121,580,764 | 121,581,763 | 3,967,631 | 209,711 | MIR3672 |
| 4149 | X | 122,213,105 | 122,214,104 | 631,342 | 201,979 | RP11-417D4.1 |
| 4153 | X | 125,866,857 | 125,867,856 | 3,652,753 | 203,863 | FO393407.1 |
| 4155 | X | 127,094,708 | 127,095,707 | 1,226,852 | 231,127 | AL596243.1 |
| 4160 | X | 137,895,295 | 137,896,294 | 10,799,588 | 207,301 | RNU6-985P |
| 4177 | X | 138,145,219 | 138,146,218 | 248,925 | 251,133 | RN7SKP31 |
| 4181 | X | 142,823,291 | 142,824,290 | 4,677,073 | 201,628 | SPANXN4 |
| 4184 | X | 144,511,738 | 144,512,737 | 1,687,448 | 202,045 | RRM2P4 |
