# Supplementary material for: In silico phylogenomics using complete genomes: a case study on the evolution of hominoids
Source: HighWire-hosted journal article supplement (doi:10.1101/gr.203950.115), 2016-07-19
Supplement: Supplemental_Table_S2.docx [file Supplemental_Table_S2.docx]

**Table S2.** Number of candidate anonymous loci per human chromosome and their composition of repetitive DNA and low complexity repeats. Numbers of candidate loci refer to the numbers of 1 kb-long loci retained by ALFIE at the conclusion of step 1 in the program. For each human Chromosome number (Chr #), the following is displayed: number of candidate loci found; size of the chromosome; size of the anonymous region (i.e., concatenated candidate loci length); total number of masked bases (‘N’s) residing within anonymous regions; percentage of each anonymous region represented by masked bases; and the size of each anonymous region after the masked bases are removed. It is estimated here that ~247 Mb (8%) or ~18 Mb (0.6%) of the hominoid genome is comprised of DNA that is free from the effects of selection depending on whether the amounts of repetitive DNA and low complexity repeats are included or excluded, respectively. The AL 292 dataset analyzed in this study was from the 0.6 % fraction because these loci are considered likely to be single-copy, neutral, unlinked, and free from repetitive DNA and low complexity repeats (e.g., CpG sites). Note, these are source data for Fig. S1.

| Chr # | # candidate loci | chr size (bp) | anonymous region total size (bp) | # masked bases in anonymous regions (bp) | % masked bases in anonymous regions | anonymous region - 'N's |
| --- | --- | --- | --- | --- | --- | --- |
| 1 | 217 | 248,956,422 | 23,603,588 | 22,607,167 | 95.8 | 996,421 |
| 2 | 392 | 242,193,529 | 6,967,353 | 5,186,571 | 74.4 | 1,780,782 |
| 3 | 393 | 198,295,559 | 6,840,568 | 5,097,756 | 74.5 | 1,742,812 |
| 4 | 394 | 190,214,555 | 5,645,347 | 3,874,923 | 68.6 | 1,770,424 |
| 5 | 231 | 181,538,259 | 6,147,758 | 5,197,276 | 84.5 | 950,482 |
| 6 | 458 | 170,805,979 | 5,492,831 | 3,709,998 | 67.5 | 1,782,833 |
| 7 | 143 | 159,345,973 | 5,280,702 | 4,686,382 | 88.7 | 594,320 |
| 8 | 72 | 145,138,636 | 2,855,982 | 2,521,027 | 88.3 | 334,955 |
| 9 | 224 | 138,394,717 | 19,380,718 | 18,317,547 | 94.5 | 1,063,171 |
| 10 | 152 | 133,797,422 | 4,103,551 | 3,582,417 | 87.3 | 521,134 |
| 11 | 114 | 135,086,622 | 5,018,127 | 4,449,360 | 88.7 | 568,767 |
| 12 | 70 | 133,275,309 | 3,840,896 | 3,524,723 | 91.8 | 316,173 |
| 13 | 431 | 114,364,328 | 21,479,476 | 19,765,274 | 92.0 | 1,714,202 |
| 14 | 145 | 107,043,718 | 19,335,888 | 18,742,218 | 96.9 | 593,670 |
| 15 | 1 | 101,991,189 | 19,722,719 | 19,695,544 | 99.9 | 27,175 |
| 16 | 67 | 90,338,345 | 10,763,731 | 10,411,040 | 96.7 | 352,691 |
| 17 | 23 | 83,257,441 | 3,998,890 | 3,905,724 | 97.7 | 93,166 |
| 18 | 332 | 80,373,285 | 7,859,129 | 6,508,388 | 82.8 | 1,350,741 |
| 19 | 0 | 58,617,616 | 3,075,056 | 3,074,805 | 100.0 | 251 |
| 20 | 97 | 64,444,167 | 3,775,765 | 3,391,155 | 89.8 | 384,610 |
| 21 | 0 | 46,709,983 | 6,786,080 | 6,780,973 | 99.9 | 5,107 |
| 22 | 33 | 50,818,468 | 13,163,214 | 13,033,766 | 99.0 | 129,448 |
| X | 202 | 156,040,895 | 7,982,197 | 6,921,516 | 86.7 | 1,060,681 |
| Y | 42 | 57,227,415 | 33,758,084 | 33,448,968 | 99.1 | 309,116 |
| Total | **4,233** | **3,088,269,832** | **246,877,650** | **228,434,518** |  | **18,443,132** |
|  |  |  | **(8%)** |  |  | **(0.6%)** |
