# Supplementary material for: In silico phylogenomics using complete genomes: a case study on the evolution of hominoids
Source: HighWire-hosted journal article supplement (doi:10.1101/gr.203950.115), 2016-07-19
Supplement: Supplemental_Table_S3.docx [file Supplemental_Table_S3.docx]

**Table S3.** Evolutionary properties for 292 anonymous loci sampled from the hominoid genomes.Each locus is represented by presumably orthologous sequences obtained from the genomes of human (H), chimpanzee (C) gorilla (G), and orangutan (O). ID = identification number of anonymous locus; Ti/Tv = estimated transition/transversion rate ratio; Model = name of nucleotide substitution model selected by program jModelTest (see Posada 2008 for details about models); Topology = topology of rooted gene tree inferred via maximum likelihood using program PhyML (Guindon et al. 2010).

| ID | Ti/Tv | Model | Topology |
| --- | --- | --- | --- |
| 1 | 2.77 | HKY+I | ((C,G),H) |
| 5 | NA | TPM3uf | ((H,C),G) |
| 9 | NA | TPM3uf | ((H,C),G) |
| 37 | 2.02 | HKY | ((H,C),G) |
| 50 | 2.12 | HKY | ((H,C),G) |
| 66 | 1.67 | HKY | ((H,C),G) |
| 84 | 1.29 | HKY | ((C,G),H) |
| 106 | 2.72 | HKY | ((C,G),H) |
| 114 | NA | TPM3uf | ((H,G),C) |
| 132 | 2.91 | HKY | ((H,C),G) |
| 133 | 2.19 | HKY | ((H,G),C) |
| 146 | 1.75 | HKY | ((C,G),H) |
| 172 | 2.71 | HKY | ((H,C),G) |
| 191 | 2.07 | HKY | ((H,C),G) |
| 210 | 0.97 | HKY | ((H,C),G) |
| 219 | 2.5 | HKY | ((H,C),G) |
| 224 | 1.79 | HKY | ((H,C),G) |
| 253 | 1.87 | HKY | ((H,G),C) |
| 259 | 2.99 | HKY | ((H,C),G) |
| 271 | 2.12 | HKY | ((H,C),G) |
| 286 | 2.22 | HKY | ((C,G),H) |
| 289 | NA | TPM2uf | ((H,C),G) |
| 294 | 3 | K80 | ((H,C),G) |
| 347 | 3.76 | HKY | ((H,C),G) |
| 374 | NA | TPM2uf | ((H,C),G) |
| 383 | 1.34 | HKY | ((H,C),G) |
| 397 | NA | TrN | ((H,C),G) |
| 398 | 2.19 | HKY | ((H,G),C) |
| 405 | 2.08 | HKY+I | ((C,G),H) |
| 410 | 1.91 | HKY | ((H,C),G) |
| 434 | 2.35 | HKY | ((H,C),G) |
| 439 | 2.34 | HKY | ((H,C),G) |
| 444 | 2.27 | HKY | ((H,G),C) |
| 463 | 3.49 | K80 | ((H,C),G) |
| 465 | 3.19 | K80 | ((H,C),G) |
| 484 | 3.38 | HKY | ((H,C),G) |
| 498 | 2.38 | HKY | ((H,C),G) |
| 519 | 1.94 | HKY | ((H,C),G) |
| 526 | 2.87 | HKY | ((C,G),H) |
| 540 | 2.81 | HKY | ((C,G),H) |
| 546 | NA | TPM3uf | ((H,C),G) |
| 554 | 2.25 | HKY | ((H,C),G) |
| 560 | NA | TPM3uf | ((C,G),H) |
| 567 | NA | F81 | ((C,G),H) |
| 585 | 2.82 | HKY | ((H,C),G) |
| 614 | 1.21 | HKY | ((H,C),G) |
| 621 | 4.84 | HKY | ((C,G),H) |
| 631 | 2.62 | HKY | ((H,C),G) |
| 664 | 1.47 | HKY | ((C,G),H) |
| 679 | 1.63 | K80 | ((H,C),G) |
| 683 | 2.75 | HKY | ((H,C),G) |
| 704 | NA | TPM2uf | ((H,C),G) |
| 727 | 1.85 | HKY | ((C,G),H) |
| 742 | 1.16 | HKY | ((H,C),G) |
| 760 | 4.08 | HKY | ((C,G),H) |
| 773 | 1.67 | HKY | ((H,C),G) |
| 782 | 2.12 | HKY | ((H,C),G) |
| 784 | 2.62 | HKY | ((H,G),C) |
| 824 | 2.18 | HKY | ((H,C),G) |
| 860 | 2.31 | HKY | ((H,C),G) |
| 892 | NA | TPM3uf | ((H,C),G) |
| 923 | 1.67 | HKY | ((H,C),G) |
| 944 | 2.1 | HKY | ((H,C),G) |
| 977 | 2.47 | HKY | ((H,C),G) |
| 996 | NA | TPM2uf | ((H,C),G) |
| 1023 | 2.03 | HKY | ((H,C),G) |
| 1050 | NA | TPM3uf | ((H,G),C) |
| 1067 | NA | TPM3uf | ((C,G),H) |
| 1086 | 1.98 | HKY | ((H,C),G) |
| 1098 | 1.81 | HKY | ((H,C),G) |
| 1122 | 1.46 | HKY | ((C,G),H) |
| 1182 | NA | TPM2uf | ((H,G),C) |
| 1210 | 2.51 | HKY | ((H,C),G) |
| 1222 | 3.17 | K80 | ((C,G),H) |
| 1233 | 2.72 | HKY | ((H,C),G) |
| 1240 | 2.09 | HKY+I | ((H,C),G) |
| 1272 | 1.5 | HKY | ((H,G),C) |
| 1290 | 4.63 | HKY | ((H,C),G) |
| 1324 | 2.1 | HKY | ((H,C),G) |
| 1343 | 1.69 | HKY | ((H,C),G) |
| 1364 | 2.71 | HKY | ((H,C),G) |
| 1405 | 1.78 | HKY | ((H,G),C) |
| 1433 | 2.12 | HKY | ((H,C),G) |
| 1467 | 2.33 | HKY | ((H,C),G) |
| 1493 | 2.67 | HKY | ((H,G),C) |
| 1501 | 2.04 | HKY | ((H,C),G) |
| 1517 | 1.82 | HKY | ((H,C),G) |
| 1519 | 2.1 | HKY | ((H,C),G) |
| 1528 | NA | TPM3uf | ((H,C),G) |
| 1531 | 7.76 | HKY | ((H,C),G) |
| 1533 | 2.4 | HKY | ((H,C),G) |
| 1537 | 1.62 | HKY | ((H,C),G) |
| 1553 | 1.66 | HKY | ((H,G),C) |
| 1564 | 2.77 | HKY | ((H,C),G) |
| 1583 | 3.29 | HKY | ((H,C),G) |
| 1591 | NA | TPM3uf | ((H,C),G) |
| 1618 | NA | TPM2uf | ((H,G),C) |
| 1642 | 1.05 | HKY | ((H,C),G) |
| 1655 | 2.43 | HKY | ((H,C),G) |
| 1670 | 1.6 | HKY | ((H,G),C) |
| 1685 | 1.94 | HKY | ((H,C),G) |
| 1715 | 2.32 | HKY | ((H,C),G) |
| 1728 | 2.18 | HKY | ((H,C),G) |
| 1749 | 2.36 | HKY | ((H,C),G) |
| 1771 | 2.62 | HKY | ((H,C),G) |
| 1783 | NA | TPM3uf | ((C,G),H) |
| 1785 | 2.1 | HKY | ((H,C),G) |
| 1804 | 1.39 | HKY | ((H,G),C) |
| 1812 | 2.41 | HKY | ((H,G),C) |
| 1823 | 1.33 | K80 | ((H,C),G) |
| 1832 | 2.1 | HKY | ((H,G),C) |
| 1834 | 2.24 | HKY | ((H,C),G) |
| 1847 | 2.26 | HKY | ((H,C),G) |
| 1882 | 2.43 | HKY | ((H,C),G) |
| 1891 | 1.51 | HKY | ((H,C),G) |
| 1894 | NA | TPM3uf | ((H,C),G) |
| 1898 | NA | F81 | ((H,C),G) |
| 1915 | 2.03 | HKY | ((H,C),G) |
| 1924 | 2.5 | HKY | ((C,G),H) |
| 1930 | 1.97 | HKY | ((H,C),G) |
| 1936 | 1.55 | HKY | ((H,C),G) |
| 1937 | NA | TPM3uf | ((H,C),G) |
| 1940 | 2.17 | HKY | ((H,C),G) |
| 1945 | 1.91 | HKY | ((H,G),C) |
| 2035 | NA | TPM3uf | ((H,C),G) |
| 2041 | 1.36 | HKY | ((C,G),H) |
| 2075 | NA | TrN | ((H,C),G) |
| 2089 | 2.91 | K80+I | ((H,C),G) |
| 2095 | 1.67 | HKY | ((C,G),H) |
| 2110 | 2.97 | HKY | ((H,G),C) |
| 2112 | 2.92 | HKY | ((H,G),C) |
| 2118 | 6.75 | HKY | ((H,C),G) |
| 2131 | 1.81 | HKY | ((H,C),G) |
| 2161 | 2.43 | HKY | ((H,C),G) |
| 2179 | 2.05 | HKY | ((H,G),C) |
| 2203 | NA | TPM2uf | ((H,C),G) |
| 2211 | NA | TrN | ((H,C),G) |
| 2239 | NA | TPM3uf | ((H,C),G) |
| 2246 | 1.44 | HKY | ((H,C),G) |
| 2256 | NA | TPM3uf | ((C,G),H) |
| 2265 | NA | TPM3uf | ((H,G),C) |
| 2266 | 1.48 | HKY | ((H,G),C) |
| 2267 | NA | TrN | ((H,C),G) |
| 2272 | 2.52 | HKY | ((H,C),G) |
| 2287 | 1.33 | HKY | ((C,G),H) |
| 2289 | 3.38 | K80 | ((C,G),H) |
| 2293 | 2.23 | HKY | ((H,C),G) |
| 2308 | NA | TPM1uf | ((H,C),G) |
| 2328 | NA | TPM3uf | ((H,C),G) |
| 2352 | 1.46 | HKY | ((H,C),G) |
| 2378 | 2.77 | HKY | ((H,C),G) |
| 2402 | NA | TPM3uf | ((H,G),C) |
| 2406 | 1.91 | HKY | ((C,G),H) |
| 2437 | NA | TPM2uf | ((H,G),C) |
| 2450 | 2.21 | HKY | ((H,G),C) |
| 2454 | 1.61 | HKY | ((H,C),G) |
| 2464 | 2.63 | HKY | ((H,C),G) |
| 2473 | 2.21 | K80 | ((H,C),G) |
| 2484 | 2.37 | HKY | ((H,G),C) |
| 2487 | NA | TrN | ((H,C),G) |
| 2496 | 1.71 | HKY | ((H,C),G) |
| 2507 | 2.47 | HKY | ((H,C),G) |
| 2522 | 2.4 | HKY | ((H,C),G) |
| 2539 | 1.97 | HKY | ((C,G),H) |
| 2552 | 1.63 | HKY | ((C,G),H) |
| 2574 | NA | TPM1uf | ((H,G),C) |
| 2582 | 1.87 | HKY | ((H,C),G) |
| 2595 | 4.08 | HKY | ((C,G),H) |
| 2605 | 2.49 | HKY | ((H,C),G) |
| 2620 | NA | TPM2uf | ((C,G),H) |
| 2646 | NA | TPM2uf | ((C,G),H) |
| 2648 | 1.93 | HKY | ((H,C),G) |
| 2667 | 1.64 | HKY | ((H,C),G) |
| 2686 | 2.28 | HKY | ((H,C),G) |
| 2700 | 2.02 | HKY | ((H,C),G) |
| 2715 | NA | TPM3uf | ((H,C),G) |
| 2725 | 2.38 | HKY | ((H,G),C) |
| 2746 | 2 | HKY | ((H,G),C) |
| 2756 | 1.5 | HKY | ((H,C),G) |
| 2761 | 2.98 | HKY | ((C,G),H) |
| 2768 | NA | TPM2uf | ((H,C),G) |
| 2784 | NA | TPM1uf | ((H,C),G) |
| 2835 | 2.41 | HKY | ((H,G),C) |
| 2866 | 2.66 | HKY | ((H,G),C) |
| 2886 | 2.06 | HKY | ((H,C),G) |
| 2888 | 1.79 | K80 | ((H,C),G) |
| 2903 | 2.29 | HKY | ((C,G),H) |
| 2909 | 3.28 | HKY | ((H,G),C) |
| 2930 | NA | TPM3uf | ((H,C),G) |
| 2948 | NA | TPM3uf | ((H,G),C) |
| 2952 | 2.09 | HKY | ((H,C),G) |
| 2974 | NA | TPM3uf | ((H,C),G) |
| 2976 | 2.12 | HKY | ((H,C),G) |
| 2995 | NA | F81 | ((H,C),G) |
| 3003 | NA | TPM3uf | ((H,G),C) |
| 3015 | 4.25 | HKY | ((H,C),G) |
| 3023 | 1.75 | HKY | ((C,G),H) |
| 3032 | NA | TPM1uf | ((H,C),G) |
| 3040 | NA | TPM2uf | ((H,G),C) |
| 3041 | 1.77 | HKY | ((H,G),C) |
| 3046 | 1.44 | HKY | ((H,C),G) |
| 3060 | 2.54 | HKY | ((H,C),G) |
| 3077 | 1.73 | HKY | ((H,C),G) |
| 3082 | 3.46 | HKY | ((C,G),H) |
| 3093 | 2.78 | HKY | ((H,C),G) |
| 3097 | 1.65 | HKY | ((C,G),H) |
| 3117 | 1.34 | HKY | ((H,C),G) |
| 3138 | 0.73 | HKY | ((C,G),H) |
| 3160 | 2.22 | HKY | ((H,C),G) |
| 3163 | 2.79 | HKY | ((C,G),H) |
| 3183 | NA | F81 | ((H,C),G) |
| 3200 | 2.79 | HKY | ((C,G),H) |
| 3204 | 1.48 | HKY | ((C,G),H) |
| 3221 | 2.04 | HKY | ((H,C),G) |
| 3243 | 2.2 | HKY | ((H,G),C) |
| 3249 | 2.26 | HKY | ((H,G),C) |
| 3263 | 2.02 | HKY | ((H,C),G) |
| 3304 | 2.82 | HKY | ((H,C),G) |
| 3339 | NA | TPM3uf | ((H,C),G) |
| 3342 | 1.62 | HKY | ((H,G),C) |
| 3358 | 1.93 | HKY | ((H,C),G) |
| 3376 | 1.89 | HKY | ((H,C),G) |
| 3415 | 2.11 | HKY | ((H,C),G) |
| 3425 | 2.58 | HKY | ((H,C),G) |
| 3443 | 3.04 | HKY | ((H,C),G) |
| 3446 | 2.14 | HKY | ((H,G),C) |
| 3473 | NA | TrN | ((H,G),C) |
| 3481 | NA | TPM3uf | ((H,C),G) |
| 3487 | 2.25 | HKY | ((C,G),H) |
| 3519 | 1.37 | HKY | ((C,G),H) |
| 3523 | 1.67 | HKY | ((H,G),C) |
| 3530 | NA | TPM3uf | ((H,C),G) |
| 3534 | 1.98 | HKY | ((H,G),C) |
| 3546 | 2.18 | K80 | ((H,G),C) |
| 3556 | 2.99 | HKY | ((H,C),G) |
| 3573 | 2.3 | HKY | ((H,C),G) |
| 3577 | 1.62 | HKY | ((H,C),G) |
| 3589 | 2.7 | HKY | ((H,C),G) |
| 3625 | NA | TPM3uf | ((H,C),G) |
| 3661 | NA | F81 | ((H,C),G) |
| 3671 | 1.24 | HKY | ((C,G),H) |
| 3677 | 3.41 | HKY | ((H,C),G) |
| 3681 | 2.53 | HKY | ((H,G),C) |
| 3683 | NA | TPM2uf | ((H,C),G) |
| 3686 | 1.55 | HKY | ((C,G),H) |
| 3694 | 2.94 | HKY | ((H,C),G) |
| 3707 | 1.49 | HKY | ((H,C),G) |
| 3727 | NA | TPM1uf | ((H,C),G) |
| 3737 | 2.4 | HKY | ((C,G),H) |
| 3741 | NA | TPM1uf+I | ((C,G),H) |
| 3749 | 6.8 | HKY+I | ((H,G),C) |
| 3761 | 2.27 | HKY | ((C,G),H) |
| 3766 | 4.46 | HKY | ((H,C),G) |
| 3783 | 1.71 | HKY | ((H,G),C) |
| 3789 | 2.1 | HKY | ((H,C),G) |
| 3794 | 4.05 | HKY | ((H,C),G) |
| 3800 | NA | TPM3uf | ((H,C),G) |
| 3830 | 1.39 | HKY | ((H,C),G) |
| 3860 | NA | F81 | ((H,C),G) |
| 3863 | NA | TPM3uf | ((H,G),C) |
| 3882 | 1.76 | HKY | ((H,G),C) |
| 3890 | NA | TrN | ((H,C),G) |
| 3896 | 1.98 | HKY | ((C,G),H) |
| 3922 | NA | TPM3uf | ((C,G),H) |
| 3923 | 1.64 | HKY | ((H,C),G) |
| 3940 | 1.35 | HKY | ((H,C),G) |
| 3955 | NA | F81 | ((H,C),G) |
| 3964 | 2.61 | HKY | ((C,G),H) |
| 3975 | NA | TPM2uf | ((H,C),G) |
| 3989 | 2.4 | HKY | ((C,G),H) |
| 4019 | 2.1 | K80 | ((H,G),C) |
| 4024 | 2.22 | HKY | ((H,C),G) |
| 4036 | 1.92 | HKY | ((H,C),G) |
| 4043 | 1.25 | HKY | ((H,C),G) |
| 4050 | 1.9 | HKY | ((H,C),G) |
| 4057 | NA | TPM3uf | ((H,C),G) |
| 4062 | 2.1 | HKY | ((H,G),C) |
| 4066 | 2.33 | HKY | ((H,C),G) |
| 4072 | 2.45 | HKY | ((H,C),G) |
| 4075 | 3.8 | HKY | ((H,C),G) |
| 4087 | 1.76 | HKY | ((H,C),G) |
| 4110 | 2.28 | HKY | ((H,C),G) |
| 4135 | 2.36 | HKY | ((C,G),H) |
| 4138 | 2.46 | HKY | ((H,C),G) |
| 4143 | 1.52 | HKY | ((H,C),G) |
| 4149 | NA | TPM3uf | ((H,C),G) |
| 4153 | 1.63 | HKY | ((H,C),G) |
| 4155 | 1.78 | HKY | ((H,C),G) |
| 4160 | 5.26 | HKY | ((H,C),G) |
| 4177 | 2.53 | HKY | ((H,G),C) |
| 4181 | NA | TPM3uf | ((C,G),H) |
| 4184 | 1.53 | HKY | ((H,C),G) |
