# Supplementary material for: In silico phylogenomics using complete genomes: a case study on the evolution of hominoids
Source: HighWire-hosted journal article supplement (doi:10.1101/gr.203950.115), 2016-07-19
Supplement: Supplemental_Table_S4.docx [file Supplemental_Table_S4.docx]

**Table S4.** Evolutionary properties for 242 AE loci sampled from the hominoid genomes.Each locus is represented by presumably orthologous sequences obtained from the genomes of human (H), chimpanzee (C) gorilla (G), and orangutan (O). locus ID = identification number of locus; Chromosome = human Chromosome number; Start and End = chromosomal coordinates in human genome hg19; Topology = topology of rooted gene tree inferred via maximum likelihood using program PhyML (Guindon et al. 2010); Ti/Tv = estimated transition/transversion rate ratio; and Model = name of nucleotide substitution model selected by program jModelTest (see Posada 2008 for details about models). Note, each locus is comprised of two 500 bp long flanking sequences each of which is located 0 bp from their adjacent AE.

| locus ID | Chromosome | Start | End | Topology | Ti/Tv | Model |
| --- | --- | --- | --- | --- | --- | --- |
| 1 | 1 | 101704486 | 101705724 | ((H,C),G) | 3.01 | K80 |
| 2 | 1 | 10363483 | 10364721 | ((C,G),H) | 0.00 | TrN |
| 3 | 1 | 109794177 | 109795415 | ((H,C),G) | 14.15 | K80 |
| 7 | 1 | 114523442 | 114524680 | ((H,C),G) | 3.34 | K80 |
| 8 | 1 | 147091059 | 147092297 | ((H,C),G) | 3.27 | HKY |
| 10 | 1 | 155448515 | 155449753 | ((C,G),H) | 0.00 | F81 |
| 13 | 1 | 171510249 | 171511487 | ((H,C),G) | 0.00 | F81 |
| 14 | 1 | 174417026 | 174418264 | ((C,G),H) | 0.00 | F81 |
| 15 | 1 | 178426694 | 178427932 | ((H,C),G) | 2.14 | K80 |
| 16 | 1 | 178833886 | 178835074 | ((H,C),G) | 1.56 | HKY |
| 19 | 1 | 200375871 | 200377109 | ((C,G),H) | 0.00 | F81 |
| 21 | 1 | 200817122 | 200818360 | ((H,C),G) | 0.00 | F81 |
| 24 | 1 | 202287117 | 202288340 | ((H,C),G) | 2.53 | HKY |
| 25 | 1 | 205272439 | 205273637 | ((C,G),H) | 2.03 | HKY |
| 26 | 1 | 208390254 | 208391492 | ((C,G),H) | 1.48 | HKY |
| 27 | 1 | 215847662 | 215848900 | ((H,C),G) | 3.56 | K80 |
| 32 | 1 | 229771075 | 229772313 | ((H,C),G) | 0.00 | TPM3 |
| 33 | 1 | 232649922 | 232651160 | ((H,C),G) | 6.74 | K80 |
| 38 | 1 | 38462534 | 38463752 | ((H,C),G) | 1.42 | HKY |
| 40 | 1 | 39796945 | 39798183 | ((H,C),G) | 1.84 | K80 |
| 41 | 1 | 40701055 | 40702293 | ((H,G),C) | 2.26 | HKY |
| 43 | 1 | 42047112 | 42048350 | ((H,C),G) | 6.32 | HKY |
| 49 | 1 | 78097266 | 78098504 | ((C,G),H) | 3.01 | HKY |
| 51 | 1 | 91403327 | 91404565 | ((H,C),G) | 2.21 | HKY |
| 55 | 10 | 105361403 | 105362641 | ((H,C),G) | 13.23 | HKY |
| 61 | 10 | 15254816 | 15256054 | ((H,G),C) | 4.56 | HKY |
| 62 | 10 | 24762103 | 24763341 | ((H,C),G) | 3.27 | K80 |
| 63 | 10 | 26668174 | 26669412 | ((C,G),H) | 1.11 | K80 |
| 67 | 10 | 50818611 | 50819849 | ((H,C),G) | 3.19 | HKY |
| 69 | 10 | 61832243 | 61833481 | ((C,G),H) | 6.01 | HKY |
| 71 | 10 | 63850637 | 63851875 | ((C,G),H) | 4.71 | HKY |
| 72 | 10 | 64973051 | 64974060 | ((H,C),G) | 0.00 | TPM3uf |
| 73 | 10 | 75406086 | 75407294 | ((H,C),G) | 0.00 | F81 |
| 76 | 10 | 76602278 | 76603516 | ((H,C),G) | 8.59 | HKY |
| 79 | 10 | 77221299 | 77222439 | ((C,G),H) | 3.22 | HKY |
| 80 | 10 | 97115195 | 97116433 | ((H,C),G) | 4.03 | HKY |
| 84 | 11 | 110035350 | 110036588 | ((C,G),H) | 0.00 | JC |
| 85 | 11 | 111745817 | 111747015 | ((H,G),C) | 4.36 | HKY |
| 86 | 11 | 118342363 | 118343561 | ((C,G),H) | 0.00 | F81 |
| 90 | 11 | 128839599 | 128840837 | ((H,C),G) | 2.51 | K80 |
| 91 | 11 | 130274910 | 130276148 | ((H,C),G) | 1.28 | K80 |
| 95 | 11 | 17190356 | 17191594 | ((C,G),H) | 2.27 | HKY |
| 97 | 11 | 36597110 | 36598348 | ((H,C),G) | 3.84 | K80 |
| 98 | 11 | 45248040 | 45249278 | ((H,C),G) | 6.36 | HKY |
| 99 | 11 | 45671186 | 45672424 | ((H,C),G) | 3.02 | HKY |
| 101 | 11 | 46725799 | 46727037 | ((H,C),G) | 3.06 | HKY |
| 103 | 11 | 606877 | 608115 | ((H,C),G) | 5.24 | HKY |
| 104 | 11 | 61511144 | 61512382 | ((H,C),G) | 6.65 | HKY |
| 105 | 11 | 70318467 | 70319705 | ((H,C),G) | 2.52 | HKY |
| 109 | 11 | 76371314 | 76372552 | ((H,C),G) | 3.64 | HKY |
| 110 | 11 | 78380165 | 78381403 | ((H,C),G) | 3.69 | K80 |
| 111 | 11 | 86518551 | 86519789 | ((H,C),G) | 6.24 | K80+I |
| 113 | 11 | 88241552 | 88242790 | ((H,C),G) | 3.02 | HKY |
| 114 | 11 | 92531802 | 92533040 | ((H,G),C) | 10.09 | HKY |
| 118 | 12 | 100451923 | 100453161 | ((H,C),G) | 5.38 | HKY |
| 119 | 12 | 106459993 | 106461231 | ((H,G),C) | 4.20 | K80 |
| 121 | 12 | 122957902 | 122959140 | ((H,C),G) | 1.76 | HKY+I |
| 123 | 12 | 129558284 | 129559522 | ((H,C),G) | 7.74 | HKY |
| 124 | 12 | 13715792 | 13717030 | ((C,G),H) | 3.51 | HKY |
| 125 | 12 | 32480337 | 32481575 | ((H,C),G) | 2.35 | HKY |
| 126 | 12 | 40012409 | 40013647 | ((H,C),G) | 0.00 | JC |
| 127 | 12 | 41965938 | 41967176 | ((C,G),H) | 2.58 | HKY |
| 128 | 12 | 67698436 | 67699674 | ((H,G),C) | 0.00 | F81 |
| 129 | 12 | 68050895 | 68052133 | ((C,G),H) | 3.26 | K80 |
| 130 | 13 | 23911676 | 23912914 | ((C,G),H) | 3.35 | HKY |
| 132 | 13 | 27332613 | 27333851 | ((H,C),G) | 14.13 | K80 |
| 133 | 13 | 33702998 | 33704160 | ((H,C),G) | 8.06 | K80 |
| 138 | 13 | 42873274 | 42874492 | ((H,C),G) | 3.85 | HKY |
| 146 | 13 | 77672061 | 77673299 | ((C,G),H) | 8.60 | HKY |
| 147 | 13 | 97638997 | 97640235 | ((H,C),G) | 0.00 | TPM2uf+I |
| 148 | 14 | 101004103 | 101005341 | ((H,C),G) | 2.79 | HKY |
| 150 | 14 | 104641653 | 104642891 | ((H,C),G) | 0.00 | TPM3uf |
| 155 | 14 | 55817420 | 55818578 | ((C,G),H) | 2.62 | K80 |
| 156 | 14 | 70634228 | 70635466 | ((C,G),H) | 3.01 | K80 |
| 157 | 14 | 79423051 | 79424047 | ((H,G),C) | 2.05 | HKY |
| 158 | 14 | 81743613 | 81744851 | ((H,C),G) | 7.05 | K80 |
| 162 | 15 | 34354881 | 34356119 | ((C,G),H) | 4.04 | K80 |
| 165 | 15 | 41164865 | 41166103 | ((H,C),G) | 2.33 | HKY |
| 170 | 15 | 43813666 | 43814904 | ((H,C),G) | 6.55 | K80 |
| 172 | 15 | 48062729 | 48063967 | ((H,G),C) | 15.08 | K80 |
| 173 | 15 | 51791071 | 51792309 | ((C,G),H) | 5.52 | HKY |
| 174 | 15 | 59910469 | 59911707 | ((H,C),G) | 2.77 | K80 |
| 176 | 15 | 65369322 | 65370560 | ((H,G),C) | 1.84 | HKY |
| 177 | 15 | 72189735 | 72190903 | ((H,C),G) | 1.91 | HKY |
| 179 | 15 | 77906441 | 77907679 | ((H,C),G) | 5.54 | HKY |
| 180 | 15 | 79748320 | 79749306 | ((H,C),G) | 10.14 | K80 |
| 182 | 15 | 83932213 | 83933451 | ((H,G),C) | 3.78 | HKY |
| 183 | 15 | 98033311 | 98034342 | ((H,C),G) | 0.00 | TPM1uf |
| 185 | 16 | 20974646 | 20975884 | ((C,G),H) | 4.05 | K80 |
| 186 | 16 | 49671373 | 49672611 | ((C,G),H) | 10.63 | HKY |
| 188 | 16 | 67942695 | 67943761 | ((H,C),G) | 4.30 | HKY |
| 189 | 16 | 68155693 | 68156931 | ((H,C),G) | 0.00 | F81 |
| 191 | 16 | 72826801 | 72828039 | ((H,G),C) | 4.90 | K80 |
| 193 | 16 | 89351942 | 89353110 | ((H,C),G) | 2.58 | HKY |
| 196 | 17 | 18218857 | 18220095 | ((C,G),H) | 2.44 | K80 |
| 197 | 17 | 37564874 | 37566112 | ((H,C),G) | 0.00 | JC |
| 199 | 17 | 38710726 | 38711964 | ((H,C),G) | 3.08 | HKY+I |
| 200 | 17 | 40010001 | 40011239 | ((H,C),G) | 4.52 | K80 |
| 201 | 17 | 47655709 | 47656947 | ((H,C),G) | 1.32 | HKY |
| 202 | 17 | 62290134 | 62291372 | ((H,C),G) | 7.08 | K80 |
| 203 | 17 | 68170755 | 68171993 | ((H,G),C) | 3.01 | K80 |
| 205 | 17 | 71281444 | 71282602 | ((H,C),G) | 3.47 | HKY |
| 206 | 17 | 72352609 | 72353847 | ((H,G),C) | 1.32 | HKY |
| 210 | 17 | 76045091 | 76046309 | ((C,G),H) | 32618.84 | K80 |
| 212 | 17 | 79898459 | 79899697 | ((H,G),C) | 0.00 | TPM1uf |
| 213 | 18 | 22804248 | 22805486 | ((H,G),C) | 16.10 | K80 |
| 216 | 18 | 24495958 | 24497196 | ((C,G),H) | 6.58 | HKY |
| 217 | 18 | 2890869 | 2892107 | ((H,G),C) | 3.59 | HKY |
| 218 | 18 | 31324459 | 31325697 | ((H,C),G) | 3.43 | K80 |
| 219 | 18 | 42530380 | 42531618 | ((H,C),G) | 32393.68 | HKY |
| 223 | 18 | 65178153 | 65179391 | ((H,C),G) | 0.00 | F81 |
| 225 | 18 | 7231047 | 7232285 | ((H,G),C) | 2.02 | K80 |
| 232 | 18 | 77895426 | 77896664 | ((H,C),G) | 14.15 | K80 |
| 235 | 19 | 31039688 | 31040926 | ((H,C),G) | 2.02 | K80 |
| 236 | 19 | 31768220 | 31769458 | ((H,C),G) | 5.55 | HKY |
| 241 | 2 | 122362885 | 122363971 | ((H,C),G) | 0.00 | TPM2uf |
| 243 | 2 | 164466655 | 164467893 | ((C,G),H) | 0.00 | JC |
| 244 | 2 | 1652197 | 1653435 | ((H,C),G) | 0.00 | F81 |
| 245 | 2 | 168099333 | 168100571 | ((H,C),G) | 0.00 | TPM1uf |
| 260 | 2 | 18112785 | 18114023 | ((H,G),C) | 4.23 | K80 |
| 261 | 2 | 190530576 | 190531654 | ((C,G),H) | 0.00 | F81 |
| 263 | 2 | 203419836 | 203421074 | ((C,G),H) | 0.00 | F81 |
| 265 | 2 | 207040520 | 207041722 | ((H,G),C) | 5.38 | HKY |
| 268 | 2 | 210559126 | 210560334 | ((H,C),G) | 4.55 | HKY |
| 275 | 2 | 219506901 | 219508139 | ((H,G),C) | 3.03 | HKY |
| 276 | 2 | 224462280 | 224463508 | ((C,G),H) | 0.00 | F81 |
| 277 | 2 | 227661551 | 227662789 | ((H,C),G) | 3.24 | HKY |
| 279 | 2 | 32639916 | 32641154 | ((C,G),H) | 0.00 | F81 |
| 280 | 2 | 48026825 | 48028063 | ((H,C),G) | 4.71 | HKY |
| 281 | 2 | 48808117 | 48809355 | ((C,G),H) | 2.01 | HKY |
| 282 | 2 | 54079992 | 54081230 | ((H,C),G) | 0.00 | JC |
| 283 | 2 | 54872876 | 54874114 | ((H,G),C) | 2.50 | K80 |
| 287 | 2 | 80529625 | 80530863 | ((H,C),G) | 0.00 | F81 |
| 288 | 2 | 86830991 | 86832229 | ((H,C),G) | 2.01 | HKY |
| 291 | 20 | 14306070 | 14307308 | ((C,G),H) | 0.00 | JC |
| 293 | 20 | 19955327 | 19956565 | ((C,G),H) | 3.01 | HKY |
| 295 | 20 | 3127408 | 3128646 | ((H,C),G) | 2.82 | K80 |
| 296 | 20 | 33329684 | 33330902 | ((H,C),G) | 7.04 | HKY |
| 297 | 20 | 39989824 | 39991062 | ((C,G),H) | 4.05 | HKY |
| 299 | 20 | 49509113 | 49510351 | ((H,C),G) | 14.13 | K80 |
| 304 | 20 | 62193756 | 62194974 | ((H,C),G) | 7.00 | HKY+I |
| 307 | 21 | 16338002 | 16339240 | ((C,G),H) | 2.76 | HKY+I |
| 309 | 21 | 32638078 | 32639316 | ((C,G),H) | 0.00 | JC |
| 313 | 22 | 18300499 | 18301697 | ((H,C),G) | 58.18 | HKY+I |
| 316 | 22 | 42605787 | 42607025 | ((C,G),H) | 0.00 | F81 |
| 319 | 3 | 112357597 | 112358835 | ((H,G),C) | 2.35 | HKY |
| 321 | 3 | 113376582 | 113377790 | ((C,G),H) | 6.58 | HKY |
| 323 | 3 | 114069334 | 114070572 | ((C,G),H) | 3.52 | HKY |
| 324 | 3 | 124951229 | 124952467 | ((H,C),G) | 0.00 | F81 |
| 326 | 3 | 127641616 | 127642854 | ((H,G),C) | 2.35 | HKY |
| 327 | 3 | 12976796 | 12978034 | ((H,C),G) | 5.58 | HKY |
| 329 | 3 | 141162109 | 141163347 | ((H,G),C) | 2.45 | K80 |
| 330 | 3 | 142280848 | 142282086 | ((H,C),G) | 7.01 | HKY |
| 331 | 3 | 150459429 | 150460667 | ((H,G),C) | 1.79 | K80 |
| 333 | 3 | 151154451 | 151155689 | ((H,C),G) | 8.11 | HKY |
| 336 | 3 | 17051611 | 17052849 | ((H,G),C) | 4.69 | HKY |
| 338 | 3 | 179051067 | 179052305 | ((H,G),C) | 3.02 | HKY |
| 339 | 3 | 194080505 | 194081743 | ((H,C),G) | 0.00 | TPM2uf |
| 340 | 3 | 196387543 | 196388781 | ((C,G),H) | 2.28 | HKY |
| 341 | 3 | 37367078 | 37368316 | ((H,C),G) | 2.15 | HKY |
| 342 | 3 | 3887023 | 3888261 | ((H,G),C) | 3.35 | HKY |
| 343 | 3 | 42678463 | 42679621 | ((C,G),H) | 8.12 | HKY |
| 345 | 3 | 43389312 | 43390550 | ((H,C),G) | 4.69 | K80 |
| 346 | 3 | 47164140 | 47165378 | ((H,C),G) | 3.50 | HKY |
| 348 | 3 | 49691378 | 49692616 | ((H,C),G) | 0.00 | F81 |
| 353 | 4 | 114278401 | 114279639 | ((H,C),G) | 1.51 | HKY |
| 355 | 4 | 121957481 | 121958719 | ((H,C),G) | 10.71 | HKY |
| 356 | 4 | 125590237 | 125591475 | ((H,C),G) | 2.62 | HKY |
| 358 | 4 | 126238429 | 126239667 | ((H,C),G) | 6.35 | K80+I |
| 361 | 4 | 138450374 | 138451612 | ((C,G),H) | 2.01 | HKY |
| 362 | 4 | 149355817 | 149357055 | ((H,C),G) | 1.89 | HKY |
| 366 | 4 | 1563358 | 1564596 | ((H,C),G) | 2.26 | HKY+G |
| 367 | 4 | 169432568 | 169433806 | ((H,C),G) | 3.05 | K80 |
| 368 | 4 | 183244669 | 183245907 | ((H,C),G) | 2.04 | HKY |
| 370 | 4 | 186544655 | 186545867 | ((C,G),H) | 2.32 | K80 |
| 371 | 4 | 187003836 | 187005074 | ((H,C),G) | 2.45 | HKY |
| 372 | 4 | 187628530 | 187629768 | ((C,G),H) | 13.15 | K80 |
| 374 | 4 | 57181545 | 57182783 | ((C,G),H) | 3.30 | HKY |
| 375 | 4 | 6862993 | 6864231 | ((H,C),G) | 0.00 | F81 |
| 380 | 5 | 112177963 | 112179201 | ((C,G),H) | 2.41 | HKY |
| 381 | 5 | 115782061 | 115783299 | ((C,G),H) | 2.18 | HKY |
| 382 | 5 | 118484333 | 118485571 | ((H,C),G) | 2.01 | HKY |
| 389 | 5 | 149359884 | 149361122 | ((H,C),G) | 4.70 | HKY |
| 390 | 5 | 149676906 | 149678144 | ((H,C),G) | 2.02 | HKY |
| 391 | 5 | 150921775 | 150922917 | ((C,G),H) | 0.00 | TrNef |
| 396 | 5 | 167644838 | 167646072 | ((H,C),G) | 6.06 | K80 |
| 399 | 5 | 33936566 | 33937804 | ((C,G),H) | 1.43 | HKY |
| 401 | 5 | 54165317 | 54166555 | ((C,G),H) | 1.76 | HKY |
| 403 | 5 | 67522126 | 67523150 | ((H,C),G) | 4.36 | HKY |
| 405 | 5 | 7866510 | 7867748 | ((H,C),G) | 1.86 | HKY |
| 406 | 6 | 100837736 | 100838944 | ((H,C),G) | 6.39 | HKY |
| 411 | 6 | 132269903 | 132271141 | ((C,G),H) | 1.92 | HKY |
| 413 | 6 | 143091187 | 143092425 | ((C,G),H) | 4.04 | K80 |
| 417 | 6 | 146125497 | 146126735 | ((H,G),C) | 3.29 | HKY |
| 418 | 6 | 146719540 | 146720778 | ((C,G),H) | 3.86 | K80 |
| 419 | 6 | 151152097 | 151153335 | ((H,C),G) | 21.25 | HKY |
| 420 | 6 | 151670944 | 151672182 | ((C,G),H) | 0.00 | TrN |
| 423 | 6 | 152651279 | 152652517 | ((C,G),H) | 0.00 | F81 |
| 424 | 6 | 157527726 | 157528964 | ((H,C),G) | 31902.56 | K80 |
| 428 | 6 | 34826058 | 34827296 | ((H,C),G) | 2.01 | K80 |
| 429 | 6 | 42796161 | 42797324 | ((C,G),H) | 0.00 | F81 |
| 430 | 6 | 53518951 | 53520189 | ((H,G),C) | 2.18 | HKY |
| 431 | 6 | 56472774 | 56474012 | ((H,C),G) | 1.85 | HKY |
| 433 | 6 | 7229804 | 7231042 | ((H,C),G) | 1.51 | HKY |
| 434 | 6 | 7579384 | 7580613 | ((H,G),C) | 0.00 | F81 |
| 439 | 6 | 87725064 | 87726271 | ((H,C),G) | 4.29 | K80 |
| 440 | 6 | 87965063 | 87966301 | ((C,G),H) | 0.00 | F81 |
| 443 | 7 | 113558214 | 113559382 | ((H,C),G) | 3.37 | HKY |
| 445 | 7 | 117431240 | 117432478 | ((C,G),H) | 4.29 | HKY |
| 446 | 7 | 132192165 | 132193403 | ((H,C),G) | 0.00 | TrN |
| 449 | 7 | 21468888 | 21470126 | ((H,C),G) | 4.53 | HKY |
| 450 | 7 | 28996739 | 28997977 | ((C,G),H) | 2.25 | HKY |
| 451 | 7 | 42004857 | 42006095 | ((H,G),C) | 0.00 | F81 |
| 452 | 7 | 82544137 | 82545375 | ((H,C),G) | 0.00 | JC |
| 453 | 8 | 106813253 | 106814491 | ((C,G),H) | 2.82 | HKY |
| 456 | 8 | 123963462 | 123964700 | ((H,G),C) | 4.80 | HKY |
| 458 | 8 | 124663841 | 124665079 | ((H,G),C) | 31539.97 | HKY |
| 459 | 8 | 125497924 | 125499162 | ((H,C),G) | 3.69 | HKY |
| 461 | 8 | 24771323 | 24772561 | ((H,C),G) | 0.00 | F81 |
| 465 | 8 | 55533488 | 55534646 | ((H,C),G) | 1.52 | K80 |
| 467 | 8 | 59059045 | 59060283 | ((H,C),G) | 2.26 | K80 |
| 470 | 8 | 67576795 | 67578033 | ((C,G),H) | 0.00 | F81 |
| 472 | 8 | 67902057 | 67903292 | ((C,G),H) | 2.45 | HKY |
| 473 | 8 | 77765352 | 77766481 | ((H,G),C) | 0.00 | F81 |
| 476 | 8 | 94934020 | 94935258 | ((H,C),G) | 3.22 | K80 |
| 479 | 9 | 109688320 | 109689558 | ((C,G),H) | 2.26 | K80 |
| 482 | 9 | 113169860 | 113171098 | ((H,G),C) | 1.52 | K80 |
| 483 | 9 | 119460054 | 119461292 | ((H,C),G) | 5.53 | K80 |
| 485 | 9 | 125796640 | 125797878 | ((H,C),G) | 0.00 | JC |
| 486 | 9 | 129641777 | 129643015 | ((C,G),H) | 0.00 | TrNef |
| 487 | 9 | 138713470 | 138714708 | ((H,C),G) | 3.41 | HKY |
| 489 | 9 | 27949587 | 27950777 | ((C,G),H) | 3.01 | HKY |
| 490 | 9 | 35091088 | 35092326 | ((H,G),C) | 2.02 | HKY |
| 491 | 9 | 35300193 | 35301371 | ((H,C),G) | 2.66 | HKY |
| 493 | 9 | 5919662 | 5920900 | ((H,C),G) | 2.35 | HKY |
| 495 | 9 | 73150371 | 73151609 | ((H,C),G) | 2.19 | K80 |
| 497 | 9 | 94172076 | 94173217 | ((C,G),H) | 0.00 | JC |
| 499 | 9 | 95147403 | 95148641 | ((H,C),G) | 2.89 | HKY |
| 500 | 9 | 990125 | 991363 | ((H,C),G) | 1.83 | K80 |
| 503 | X | 17743506 | 17744744 | ((C,G),H) | 34225.45 | K80 |
| 508 | X | 39932620 | 39933858 | ((H,G),C) | 7.56 | HKY |
| 509 | X | 73960642 | 73961880 | ((H,G),C) | 0.96 | HKY |
