# Supplementary material for: In silico phylogenomics using complete genomes: a case study on the evolution of hominoids
Source: HighWire-hosted journal article supplement (doi:10.1101/gr.203950.115), 2016-07-19
Supplement: Supplemental_Table_S5.docx [file Supplemental_Table_S5.docx]

**Table S5.** Evolutionary properties for 171 AE loci sampled from the hominoid genomes.Each locus is represented by presumably orthologous sequences obtained from the genomes of human (H), chimpanzee (C) gorilla (G), and orangutan (O). locus ID = identification number of locus; Chromosome = human Chromosome number; Start and End = chromosomal coordinates in human genome hg19; Topology = topology of rooted gene tree inferred via maximum likelihood using program PhyML (Guindon et al. 2010); Ti/Tv = estimated transition/transversion rate ratio; and Model = name of nucleotide substitution model selected by program jModelTest (see Posada 2008 for details about models). Note, each locus is comprised of two 500 bp long flanking sequences each of which is located 500 bp from their adjacent AE.

| locus ID | Chromosome | Start | End | Topology | Ti/Tv | Model |
| --- | --- | --- | --- | --- | --- | --- |
| 3 | 1 | 109793677 | 109795915 | ((H,C),G) | 2.61 | K80 |
| 8 | 1 | 147090559 | 147092797 | ((H,C),G) | 0.00 | F81 |
| 10 | 1 | 155448015 | 155450253 | ((C,G),H) | 0.00 | JC |
| 12 | 1 | 16260110 | 16262348 | ((H,C),G) | 2.21 | HKY |
| 15 | 1 | 178426194 | 178428432 | ((H,C),G) | 1.59 | HKY |
| 22 | 1 | 200817446 | 200819684 | ((H,C),G) | 4.04 | HKY |
| 25 | 1 | 205272060 | 205274137 | ((C,G),H) | 2.20 | K80 |
| 29 | 1 | 223176939 | 223179177 | ((H,C),G) | 0.00 | TPM3 |
| 31 | 1 | 229770352 | 229772590 | ((C,G),H) | 2.18 | K80 |
| 33 | 1 | 232649422 | 232651491 | ((H,C),G) | 4.26 | K80 |
| 34 | 1 | 240070097 | 240072335 | ((H,C),G) | 1.74 | K80 |
| 39 | 1 | 38462629 | 38464837 | ((H,C),G) | 3.68 | HKY |
| 41 | 1 | 40700555 | 40702793 | ((H,C),G) | 3.28 | HKY |
| 43 | 1 | 42046612 | 42048850 | ((C,G),H) | 1.62 | HKY |
| 45 | 1 | 59246744 | 59248982 | ((C,G),H) | 0.00 | JC |
| 49 | 1 | 78096766 | 78099004 | ((C,G),H) | 0.00 | F81 |
| 51 | 1 | 91402827 | 91405065 | ((H,C),G) | 2.83 | HKY |
| 53 | 1 | 99771079 | 99773317 | ((C,G),H) | 1.87 | HKY |
| 56 | 10 | 126713648 | 126715886 | ((H,C),G) | 2.37 | K80 |
| 59 | 10 | 131403288 | 131405526 | ((H,C),G) | 2.11 | HKY |
| 63 | 10 | 26667674 | 26669912 | ((H,G),C) | 2.20 | HKY |
| 65 | 10 | 31808973 | 31811211 | ((H,C),G) | 0.00 | F81 |
| 66 | 10 | 50530912 | 50533150 | ((H,C),G) | 6.29 | HKY |
| 68 | 10 | 50818878 | 50821116 | ((H,C),G) | 1.13 | HKY |
| 69 | 10 | 61831743 | 61833981 | ((H,G),C) | 0.00 | F81 |
| 71 | 10 | 63850137 | 63852375 | ((H,C),G) | 2.14 | K80 |
| 72 | 10 | 64972322 | 64974560 | ((C,G),H) | 5.55 | HKY |
| 80 | 10 | 97114695 | 97116933 | ((H,C),G) | 2.22 | K80 |
| 82 | 10 | 98740449 | 98742588 | ((H,C),G) | 1.72 | K80 |
| 84 | 11 | 110034850 | 110037088 | ((C,G),H) | 3.62 | HKY |
| 85 | 11 | 111745504 | 111747515 | ((H,C),G) | 1.79 | HKY |
| 86 | 11 | 118341863 | 118344061 | ((H,C),G) | 2.51 | HKY |
| 93 | 11 | 16006746 | 16008984 | ((C,G),H) | 2.18 | HKY |
| 95 | 11 | 17190153 | 17192094 | ((H,C),G) | 0.00 | F81 |
| 98 | 11 | 45247540 | 45249775 | ((H,C),G) | 3.29 | K80 |
| 99 | 11 | 45670686 | 45672924 | ((H,C),G) | 1.79 | HKY |
| 101 | 11 | 46725582 | 46727537 | ((H,C),G) | 2.75 | K80 |
| 103 | 11 | 606377 | 608615 | ((C,G),H) | 2.69 | HKY |
| 104 | 11 | 61510862 | 61512882 | ((H,C),G) | 0.00 | TPM3uf |
| 110 | 11 | 78379861 | 78381737 | ((C,G),H) | 10.12 | K80 |
| 114 | 11 | 92531302 | 92533540 | ((H,G),C) | 7.03 | K80 |
| 119 | 12 | 106459493 | 106461731 | ((C,G),H) | 14.07 | K80 |
| 121 | 12 | 122957402 | 122959281 | ((C,G),H) | 0.00 | TrN |
| 124 | 12 | 13715292 | 13717530 | ((H,C),G) | 2.77 | K80 |
| 125 | 12 | 32479837 | 32482039 | ((C,G),H) | 0.00 | TPM3uf |
| 130 | 13 | 23911176 | 23913414 | ((H,C),G) | 6.55 | HKY |
| 132 | 13 | 27332113 | 27334351 | ((C,G),H) | 3.03 | HKY |
| 140 | 13 | 42873713 | 42875951 | ((H,C),G) | 4.87 | HKY |
| 144 | 13 | 58207013 | 58209251 | ((C,G),H) | 2.68 | HKY |
| 148 | 14 | 101003603 | 101005841 | ((H,C),G) | 0.00 | TPM2uf |
| 149 | 14 | 102451960 | 102454107 | ((H,C),G) | 5.06 | K80 |
| 150 | 14 | 104641153 | 104643391 | ((H,C),G) | 3.74 | HKY |
| 152 | 14 | 26916166 | 26918382 | ((H,C),G) | 28656.03 | HKY |
| 155 | 14 | 55816920 | 55819078 | ((H,G),C) | 2.35 | K80 |
| 157 | 14 | 79422551 | 79424688 | ((C,G),H) | 1.50 | HKY |
| 158 | 14 | 81743113 | 81745351 | ((C,G),H) | 2.74 | K80 |
| 163 | 15 | 40659366 | 40661604 | ((H,C),G) | 3.64 | HKY |
| 168 | 15 | 42983148 | 42985386 | ((H,C),G) | 1.68 | K80 |
| 170 | 15 | 43813166 | 43815404 | ((C,G),H) | 3.02 | K80 |
| 173 | 15 | 51790571 | 51792809 | ((C,G),H) | 3.05 | HKY |
| 174 | 15 | 59909969 | 59912207 | ((H,C),G) | 1.41 | HKY |
| 176 | 15 | 65368927 | 65371060 | ((H,C),G) | 2.23 | K80 |
| 180 | 15 | 79747568 | 79749806 | ((H,C),G) | 5.92 | HKY |
| 184 | 16 | 19125823 | 19128061 | ((H,C),G) | 1.63 | K80 |
| 185 | 16 | 20974452 | 20976384 | ((C,G),H) | 2.90 | K80 |
| 186 | 16 | 49670873 | 49673111 | ((H,C),G) | 7.77 | HKY |
| 192 | 16 | 72827384 | 72829622 | ((H,C),G) | 31598.57 | HKY |
| 194 | 17 | 17066712 | 17068950 | ((H,C),G) | 7.12 | K80 |
| 195 | 17 | 17696423 | 17698661 | ((C,G),H) | 3.70 | HKY |
| 196 | 17 | 18218357 | 18220595 | ((C,G),H) | 1.22 | K80 |
| 197 | 17 | 37564374 | 37566612 | ((H,C),G) | 1584.46 | HKY |
| 199 | 17 | 38710226 | 38712152 | ((H,C),G) | 2.83 | K80 |
| 201 | 17 | 47655209 | 47657447 | ((H,C),G) | 2.23 | K80 |
| 203 | 17 | 68170255 | 68172493 | ((H,C),G) | 4.06 | K80 |
| 205 | 17 | 71280944 | 71283102 | ((H,G),C) | 1.98 | HKY+I |
| 207 | 17 | 74003028 | 74005266 | ((H,G),C) | 1.79 | HKY |
| 211 | 17 | 76045061 | 76047299 | ((H,C),G) | 2.70 | HKY |
| 215 | 18 | 22804558 | 22806796 | ((H,C),G) | 2.26 | K80 |
| 216 | 18 | 24495458 | 24497696 | ((C,G),H) | 2.10 | HKY |
| 217 | 18 | 2890427 | 2892607 | ((H,C),G) | 2.02 | K80 |
| 219 | 18 | 42529880 | 42532118 | ((C,G),H) | 4.36 | HKY |
| 224 | 18 | 65178643 | 65180881 | ((H,C),G) | 0.00 | F81 |
| 226 | 18 | 72997434 | 72999672 | ((H,C),G) | 0.00 | TrN |
| 231 | 18 | 77170051 | 77172247 | ((H,C),G) | 2.98 | HKY |
| 232 | 18 | 77894926 | 77897164 | ((H,C),G) | 0.00 | TPM2 |
| 238 | 19 | 32843429 | 32845597 | ((H,C),G) | 6.04 | HKY |
| 240 | 2 | 11052545 | 11054678 | ((C,G),H) | 1.90 | HKY |
| 243 | 2 | 164466155 | 164468393 | ((C,G),H) | 3.35 | K80 |
| 245 | 2 | 168098833 | 168101071 | ((H,C),G) | 1.88 | HKY |
| 246 | 2 | 179395138 | 179397376 | ((C,G),H) | 2.41 | HKY |
| 262 | 2 | 198948428 | 198950596 | ((H,C),G) | 9.08 | HKY |
| 268 | 2 | 210558626 | 210560834 | ((H,G),C) | 5.72 | HKY |
| 276 | 2 | 224461780 | 224464008 | ((C,G),H) | 2.83 | HKY |
| 280 | 2 | 48026325 | 48028500 | ((H,C),G) | 3.17 | HKY+I |
| 282 | 2 | 54079768 | 54081730 | ((H,C),G) | 1.75 | HKY |
| 283 | 2 | 54872376 | 54874614 | ((H,C),G) | 1.17 | K80 |
| 286 | 2 | 60688134 | 60690372 | ((H,C),G) | 6.53 | K80+I |
| 288 | 2 | 86830491 | 86832729 | ((H,C),G) | 4.28 | HKY |
| 290 | 20 | 10621105 | 10623308 | ((H,C),G) | 6.08 | K80 |
| 291 | 20 | 14305570 | 14307808 | ((C,G),H) | 8.05 | HKY |
| 295 | 20 | 3127025 | 3129146 | ((C,G),H) | 0.00 | TrN |
| 298 | 20 | 49508163 | 49510401 | ((H,C),G) | 6.54 | K80 |
| 303 | 20 | 58518414 | 58520632 | ((H,C),G) | 1.35 | HKY |
| 304 | 20 | 62193256 | 62195474 | ((H,G),C) | 5.13 | HKY |
| 307 | 21 | 16337502 | 16339740 | ((H,G),C) | 13.11 | HKY |
| 310 | 21 | 37617023 | 37619141 | ((H,C),G) | 3.17 | K80 |
| 312 | 21 | 43411320 | 43413558 | ((C,G),H) | 0.00 | TPM3 |
| 313 | 22 | 18299999 | 18302197 | ((H,G),C) | 2.68 | HKY |
| 316 | 22 | 42605392 | 42607525 | ((H,C),G) | 2.02 | K80 |
| 319 | 3 | 112357114 | 112359335 | ((H,C),G) | 2.84 | K80 |
| 323 | 3 | 114068903 | 114071072 | ((C,G),H) | 4.79 | K80 |
| 327 | 3 | 12976296 | 12978434 | ((H,C),G) | 1.72 | HKY |
| 331 | 3 | 150458929 | 150461167 | ((H,C),G) | 0.00 | TPM3 |
| 336 | 3 | 17051111 | 17053349 | ((H,G),C) | 6.55 | HKY |
| 341 | 3 | 37366578 | 37368816 | ((C,G),H) | 2.14 | HKY |
| 343 | 3 | 42677963 | 42680121 | ((C,G),H) | 0.00 | TPM3uf |
| 345 | 3 | 43388812 | 43391050 | ((H,G),C) | 4.79 | K80 |
| 346 | 3 | 47163640 | 47165878 | ((H,C),G) | 4.24 | HKY |
| 348 | 3 | 49690878 | 49693116 | ((C,G),H) | 0.00 | F81 |
| 349 | 3 | 51429028 | 51431266 | ((H,C),G) | 2.88 | HKY |
| 351 | 3 | 73431883 | 73434121 | ((H,C),G) | 2.61 | K80 |
| 353 | 4 | 114277901 | 114280139 | ((H,C),G) | 1.91 | HKY |
| 356 | 4 | 125590098 | 125591975 | ((H,C),G) | 0.00 | F81 |
| 358 | 4 | 126237929 | 126240167 | ((H,C),G) | 0.00 | JC |
| 361 | 4 | 138449874 | 138452112 | ((H,C),G) | 5.92 | HKY+I |
| 362 | 4 | 149355317 | 149357555 | ((C,G),H) | 0.00 | TrN |
| 369 | 4 | 186543894 | 186546102 | ((C,G),H) | 2.90 | K80 |
| 371 | 4 | 187003406 | 187005375 | ((C,G),H) | 2.16 | HKY |
| 372 | 4 | 187628030 | 187630268 | ((H,C),G) | 2.76 | K80 |
| 373 | 4 | 37446612 | 37448850 | ((C,G),H) | 0.00 | TrNef |
| 374 | 4 | 57181045 | 57182882 | ((H,G),C) | 1.70 | HKY |
| 375 | 4 | 6862493 | 6864731 | ((H,G),C) | 2.27 | HKY |
| 380 | 5 | 112177463 | 112179701 | ((C,G),H) | 0.00 | F81 |
| 386 | 5 | 139907016 | 139909254 | ((H,G),C) | 0.00 | F81 |
| 392 | 5 | 150921815 | 150924053 | ((C,G),H) | 3989.24 | K80 |
| 396 | 5 | 167644334 | 167646572 | ((H,C),G) | 3.03 | HKY |
| 397 | 5 | 179192022 | 179193911 | ((H,C),G) | 0.00 | TPM1 |
| 401 | 5 | 54164817 | 54167055 | ((C,G),H) | 2.08 | HKY |
| 405 | 5 | 7866010 | 7868248 | ((H,C),G) | 0.00 | F81 |
| 408 | 6 | 12120215 | 12122453 | ((H,C),G) | 0.00 | TPM1uf |
| 412 | 6 | 138752089 | 138754327 | ((H,G),C) | 2.51 | HKY |
| 413 | 6 | 143090687 | 143092925 | ((H,C),G) | 6.56 | K80 |
| 417 | 6 | 146124997 | 146127235 | ((H,C),G) | 6.05 | HKY |
| 419 | 6 | 151151610 | 151153817 | ((H,C),G) | 1.93 | K80 |
| 420 | 6 | 151670444 | 151672682 | ((C,G),H) | 0.00 | TrN |
| 423 | 6 | 152650779 | 152653017 | ((H,C),G) | 3.02 | HKY |
| 429 | 6 | 42795645 | 42797824 | ((C,G),H) | 3.80 | K80 |
| 431 | 6 | 56472274 | 56474512 | ((H,C),G) | 3.45 | HKY |
| 440 | 6 | 87964563 | 87966801 | ((C,G),H) | 0.00 | F81 |
| 444 | 7 | 116339073 | 116341311 | ((H,G),C) | 4.33 | HKY+I |
| 449 | 7 | 21468388 | 21470626 | ((H,C),G) | 0.00 | F81 |
| 450 | 7 | 28996239 | 28998477 | ((H,C),G) | 0.00 | TPM3uf |
| 452 | 7 | 82543654 | 82545875 | ((H,C),G) | 2.22 | HKY |
| 454 | 8 | 106813354 | 106815592 | ((H,C),G) | 2.66 | HKY+I |
| 457 | 8 | 123963529 | 123965767 | ((H,G),C) | 5.36 | HKY |
| 470 | 8 | 67576295 | 67578533 | ((H,G),C) | 3.35 | HKY |
| 474 | 8 | 77765555 | 77767793 | ((H,C),G) | 4.51 | HKY |
| 477 | 8 | 94934444 | 94936682 | ((H,C),G) | 2.16 | HKY |
| 479 | 9 | 109687860 | 109690058 | ((H,C),G) | 30053.37 | HKY |
| 482 | 9 | 113169360 | 113171433 | ((H,C),G) | 2.90 | K80 |
| 486 | 9 | 129641303 | 129643515 | ((H,C),G) | 2.41 | HKY |
| 487 | 9 | 138712970 | 138715208 | ((H,C),G) | 3.69 | HKY |
| 489 | 9 | 27949087 | 27951325 | ((H,C),G) | 2.37 | K80 |
| 490 | 9 | 35090588 | 35092826 | ((H,C),G) | 2.36 | K80 |
| 497 | 9 | 94171576 | 94173814 | ((H,C),G) | 3.44 | HKY |
| 499 | 9 | 95146903 | 95149033 | ((H,C),G) | 11.20 | HKY |
| 500 | 9 | 989625 | 991863 | ((C,G),H) | 2.19 | HKY |
| 502 | X | 129147991 | 129150024 | ((H,G),C) | 4.03 | HKY |
| 508 | X | 39932120 | 39934358 | ((H,C),G) | 4.78 | K80 |
| 511 | X | 73961614 | 73963852 | ((H,C),G) | 3.35 | K80 |
| 512 | X | 84525243 | 84527481 | ((H,G),C) | 2.36 | HKY |
