# Supplementary material for: In silico phylogenomics using complete genomes: a case study on the evolution of hominoids
Source: HighWire-hosted journal article supplement (doi:10.1101/gr.203950.115), 2016-07-19
Supplement: Supplemental_Table_S6.docx [file Supplemental_Table_S6.docx]

**Table S6.** Posterior probabilities and associated statistics for parameters estimated from our AL 292 dataset. We used the program BPP2.2 (Yang 2001) to estimate three ancestral population size (**) and three speciation (**) parameters from genomic data for the hominoids. See Table S5 for descriptions of prior combos (P1-P5) and parameters. We repeated each analysis once (runs 1 and 2) to check for convergence.

| **292-locus P1 run 1** | HC | HCG | HCGO | HCG-O | HC-G | HC |
| --- | --- | --- | --- | --- | --- | --- |
| mean | 0.004465 | 0.003368 | 0.005494 | 0.012518 | 0.006085 | 0.004095 |
| median | 0.004423 | 0.003359 | 0.00548 | 0.01252 | 0.006086 | 0.004097 |
| S.D. | 0.000811 | 0.000317 | 0.000512 | 0.000248 | 0.000151 | 0.000215 |
| min | 0.001769 | 0.002365 | 0.00389 | 0.011585 | 0.005447 | 0.003269 |
| max | 0.008188 | 0.004838 | 0.007851 | 0.013512 | 0.006647 | 0.004912 |
| 2.50% | 0.002984 | 0.002784 | 0.004527 | 0.01203 | 0.005788 | 0.003672 |
| 97.50% | 0.00618 | 0.004014 | 0.006533 | 0.013002 | 0.00638 | 0.004518 |
| 2.5%HPD | 0.002926 | 0.002782 | 0.004499 | 0.012035 | 0.005779 | 0.003674 |
| 97.5%HPD | 0.00611 | 0.00401 | 0.006497 | 0.013004 | 0.00637 | 0.004519 |
|  |  |  |  |  |  |  |
|  |  |  |  |  |  |  |
| **292-locus P1 run2** | HC | HCG | HCGO | HCG-O | HC-G | HC |
| mean | 0.004464 | 0.003373 | 0.005523 | 0.012508 | 0.006084 | 0.004094 |
| median | 0.004418 | 0.00336 | 0.005508 | 0.012507 | 0.006086 | 0.004097 |
| S.D. | 0.000811 | 0.00031 | 0.000528 | 0.000253 | 0.000149 | 0.000214 |
| min | 0.00163 | 0.002326 | 0.003371 | 0.011575 | 0.005434 | 0.003172 |
| max | 0.008327 | 0.004951 | 0.007648 | 0.013553 | 0.006628 | 0.00508 |
| 2.50% | 0.003011 | 0.002801 | 0.004536 | 0.012016 | 0.005788 | 0.003667 |
| 97.50% | 0.006209 | 0.004011 | 0.006594 | 0.013005 | 0.006371 | 0.004506 |
| 2.5%HPD | 0.002916 | 0.002782 | 0.004485 | 0.012023 | 0.005795 | 0.003671 |
| 97.5%HPD | 0.006066 | 0.00398 | 0.006531 | 0.013009 | 0.006376 | 0.004508 |
|  |  |  |  |  |  |  |
|  |  |  |  |  |  |  |
|  |  |  |  |  |  |  |
|  |  |  |  |  |  |  |
| **292-locus P2 run 1** | HC | HCG | HCGO | HCG-O | HC-G | HC |
| mean | 0.004485 | 0.003352 | 0.005488 | 0.012529 | 0.006092 | 0.004089 |
| median | 0.00446 | 0.003337 | 0.005459 | 0.01253 | 0.006093 | 0.004087 |
| S.D. | 0.000792 | 0.000303 | 0.000539 | 0.000257 | 0.000146 | 0.00021 |
| min | 0.002051 | 0.002409 | 0.003716 | 0.011586 | 0.005437 | 0.003313 |
| max | 0.008029 | 0.004645 | 0.008446 | 0.013472 | 0.006659 | 0.004855 |
| 2.50% | 0.003019 | 0.002803 | 0.004505 | 0.012012 | 0.005807 | 0.003678 |
| 97.50% | 0.006136 | 0.003982 | 0.006601 | 0.013027 | 0.006372 | 0.004504 |
| 2.5%HPD | 0.002961 | 0.002793 | 0.004497 | 0.012014 | 0.005804 | 0.003678 |
| 97.5%HPD | 0.006053 | 0.003967 | 0.006591 | 0.013028 | 0.006369 | 0.004501 |
|  |  |  |  |  |  |  |
|  |  |  |  |  |  |  |
| **292-locus P2 run2** | HC | HCG | HCGO | HCG-O | HC-G | HC |
| mean | 0.004512 | 0.00335 | 0.005506 | 0.012517 | 0.006093 | 0.004083 |
| median | 0.004469 | 0.003339 | 0.005487 | 0.012518 | 0.006093 | 0.004084 |
| S.D. | 0.000814 | 0.000306 | 0.000526 | 0.000251 | 0.000148 | 0.000213 |
| min | 0.002003 | 0.002386 | 0.003675 | 0.011591 | 0.005537 | 0.003065 |
| max | 0.008475 | 0.004745 | 0.007948 | 0.013537 | 0.006715 | 0.004882 |
| 2.50% | 0.003047 | 0.002781 | 0.004536 | 0.012022 | 0.005805 | 0.003665 |
| 97.50% | 0.006232 | 0.003983 | 0.006591 | 0.013005 | 0.006381 | 0.004493 |
| 2.5%HPD | 0.002981 | 0.002748 | 0.004486 | 0.012023 | 0.005806 | 0.00367 |
| 97.5%HPD | 0.006142 | 0.003945 | 0.006528 | 0.013005 | 0.006382 | 0.004496 |
|  |  |  |  |  |  |  |
|  |  |  |  |  |  |  |
|  |  |  |  |  |  |  |
|  |  |  |  |  |  |  |
| **292-locus P3 run1** | HC | HCG | HCGO | HCG-O | HC-G | HC |
| mean | 0.005665 | 0.003397 | 0.005958 | 0.012387 | 0.006095 | 0.00386 |
| median | 0.005566 | 0.003379 | 0.005937 | 0.012389 | 0.006096 | 0.003866 |
| S.D. | 0.001098 | 0.000303 | 0.000576 | 0.000254 | 0.000143 | 0.000236 |
| min | 0.00246 | 0.002266 | 0.003757 | 0.011346 | 0.00548 | 0.002878 |
| max | 0.010912 | 0.004752 | 0.008979 | 0.013485 | 0.006639 | 0.004716 |
| 2.50% | 0.003789 | 0.002846 | 0.004897 | 0.01189 | 0.005811 | 0.003372 |
| 97.50% | 0.008141 | 0.004036 | 0.007138 | 0.01288 | 0.006372 | 0.004308 |
| 2.5%HPD | 0.003677 | 0.002801 | 0.004859 | 0.011895 | 0.005815 | 0.003378 |
| 97.5%HPD | 0.007964 | 0.003986 | 0.007093 | 0.012881 | 0.006375 | 0.004313 |
|  |  |  |  |  |  |  |
|  |  |  |  |  |  |  |
| **292-locus P3 run2** | HC | HCG | HCGO | HCG-O | HC-G | HC |
| mean | 0.005704 | 0.003378 | 0.005965 | 0.012384 | 0.006104 | 0.003852 |
| median | 0.005626 | 0.003367 | 0.005946 | 0.012386 | 0.006104 | 0.003854 |
| S.D. | 0.001075 | 0.000308 | 0.000576 | 0.000253 | 0.000144 | 0.000232 |
| min | 0.002659 | 0.00243 | 0.004032 | 0.011341 | 0.005533 | 0.00271 |
| max | 0.011061 | 0.004856 | 0.008457 | 0.013374 | 0.006674 | 0.004661 |
| 2.50% | 0.003826 | 0.002823 | 0.00491 | 0.011883 | 0.005821 | 0.00339 |
| 97.50% | 0.008022 | 0.004015 | 0.007159 | 0.012884 | 0.006387 | 0.004286 |
| 2.5%HPD | 0.003724 | 0.002799 | 0.004868 | 0.011901 | 0.005823 | 0.003398 |
| 97.5%HPD | 0.007851 | 0.00398 | 0.007107 | 0.012898 | 0.006388 | 0.004291 |
|  |  |  |  |  |  |  |
|  |  |  |  |  |  |  |
|  |  |  |  |  |  |  |
|  |  |  |  |  |  |  |
| **292-locus P4 run1** | HC | HCG | HCGO | HCG-O | HC-G | HC |
| mean | 0.005716 | 0.00338 | 0.005958 | 0.012396 | 0.006102 | 0.003851 |
| median | 0.005636 | 0.003367 | 0.005939 | 0.012398 | 0.006103 | 0.003852 |
| S.D. | 0.001074 | 0.000306 | 0.000581 | 0.000257 | 0.000144 | 0.000232 |
| min | 0.002185 | 0.00236 | 0.004012 | 0.01128 | 0.005496 | 0.002895 |
| max | 0.010886 | 0.004671 | 0.008489 | 0.013408 | 0.006661 | 0.004743 |
| 2.50% | 0.003828 | 0.002829 | 0.004888 | 0.011886 | 0.005821 | 0.003392 |
| 97.50% | 0.008015 | 0.004024 | 0.007168 | 0.012897 | 0.006382 | 0.004302 |
| 2.5%HPD | 0.003777 | 0.002806 | 0.004871 | 0.011886 | 0.005822 | 0.003382 |
| 97.5%HPD | 0.007937 | 0.003992 | 0.007141 | 0.012897 | 0.006382 | 0.004288 |
|  |  |  |  |  |  |  |
|  |  |  |  |  |  |  |
| **292-locus P4 run2** | HC | HCG | HCGO | HCG-O | HC-G | HC |
| mean | 0.005641 | 0.003401 | 0.005951 | 0.012399 | 0.006096 | 0.003864 |
| median | 0.00557 | 0.00339 | 0.005937 | 0.012401 | 0.006096 | 0.003866 |
| S.D. | 0.001054 | 0.000312 | 0.000564 | 0.000249 | 0.000145 | 0.000229 |
| min | 0.002587 | 0.002374 | 0.003926 | 0.011331 | 0.005516 | 0.002748 |
| max | 0.01128 | 0.005 | 0.008307 | 0.013316 | 0.006727 | 0.00467 |
| 2.50% | 0.003794 | 0.002819 | 0.004891 | 0.011908 | 0.005813 | 0.003414 |
| 97.50% | 0.007906 | 0.004033 | 0.007105 | 0.012886 | 0.006383 | 0.004303 |
| 2.5%HPD | 0.003584 | 0.002808 | 0.004824 | 0.011901 | 0.00581 | 0.003412 |
| 97.5%HPD | 0.007658 | 0.004019 | 0.007026 | 0.012875 | 0.006378 | 0.0043 |
|  |  |  |  |  |  |  |
|  |  |  |  |  |  |  |
|  |  |  |  |  |  |  |
|  |  |  |  |  |  |  |
| **292-locus P5 run1** | HC | HCG | HCGO | HCG-O | HC-G | HC |
| mean | 0.00615 | 0.003389 | 0.006118 | 0.012341 | 0.006102 | 0.003779 |
| median | 0.006046 | 0.003379 | 0.006104 | 0.01234 | 0.006102 | 0.003782 |
| S.D. | 0.001178 | 0.00031 | 0.000589 | 0.000256 | 0.000148 | 0.000236 |
| min | 0.002799 | 0.002246 | 0.004042 | 0.011423 | 0.005423 | 0.0029 |
| max | 0.011401 | 0.004783 | 0.00828 | 0.013204 | 0.006676 | 0.004683 |
| 2.50% | 0.004136 | 0.002818 | 0.005007 | 0.011834 | 0.00581 | 0.003306 |
| 97.50% | 0.008718 | 0.004035 | 0.00733 | 0.012844 | 0.006393 | 0.004234 |
| 2.5%HPD | 0.004025 | 0.002806 | 0.004978 | 0.011837 | 0.005799 | 0.003298 |
| 97.5%HPD | 0.008568 | 0.004016 | 0.007281 | 0.012845 | 0.00638 | 0.004226 |
|  |  |  |  |  |  |  |
|  |  |  |  |  |  |  |
| **292-locus P5 run2** | HC | HCG | HCGO | HCG-O | HC-G | HC |
| mean | 0.006184 | 0.003395 | 0.006105 | 0.012348 | 0.006101 | 0.003769 |
| median | 0.006099 | 0.003384 | 0.006086 | 0.012347 | 0.006099 | 0.003774 |
| S.D. | 0.001164 | 0.000314 | 0.00059 | 0.000254 | 0.000148 | 0.000231 |
| min | 0.002924 | 0.002338 | 0.004058 | 0.011339 | 0.00544 | 0.002818 |
| max | 0.012097 | 0.004907 | 0.008801 | 0.013388 | 0.006688 | 0.004615 |
| 2.50% | 0.004152 | 0.002818 | 0.00501 | 0.011843 | 0.005811 | 0.003304 |
| 97.50% | 0.008715 | 0.004044 | 0.007307 | 0.012847 | 0.006389 | 0.004212 |
| 2.5%HPD | 0.003958 | 0.002809 | 0.004978 | 0.011863 | 0.005812 | 0.003322 |
| 97.5%HPD | 0.008431 | 0.004031 | 0.007265 | 0.012861 | 0.006389 | 0.004225 |
