# Supplementary material for: In silico phylogenomics using complete genomes: a case study on the evolution of hominoids
Source: HighWire-hosted journal article supplement (doi:10.1101/gr.203950.115), 2016-07-19
Supplement: Supplemental_Table_S7.docx [file Supplemental_Table_S7.docx]

**Table S7.** Posterior probabilities and associated statistics for parameters estimated from our AL 292 dataset converted into demographic and time units.We converted the original parameter estimates from Table S8 into demographic and absolute time units. See Table S5 for descriptions of prior combos (P1-P5), parameters, and details about parameter conversions. Speciation times are in units of millions of years ago.

| **292-locus P1 run 1** | *N*HC | *N*HCG | *N*HCGO | HCG-O | HC-G | HC |
| --- | --- | --- | --- | --- | --- | --- |
| mean | 42,443 | 39,717 | 90,362 | 12.5 | 6.1 | 4.1 |
| median | 42,044 | 39,611 | 90,132 | 12.5 | 6.1 | 4.1 |
| S.D. | 15,418 |  |  |  |  |  |
| min |  |  |  |  |  |  |
| max |  |  |  |  |  |  |
| 2.50% | 28,365 | 32,830 | 74,457 | 12.0 | 5.8 | 3.7 |
| 97.50% | 58,745 | 47,335 | 107,451 | 13.0 | 6.4 | 4.5 |
| 2.5%HPD | 27,814 | 32,807 | 73,997 | 12.0 | 5.8 | 3.7 |
| 97.5%HPD | 58,080 | 47,288 | 106,859 | 13.0 | 6.4 | 4.5 |
|  |  |  |  |  |  |  |
|  |  |  |  |  |  |  |
| **292-locus P1 run2** | *N*HC | *N*HCG | *N*HCGO | HCG-O | HC-G | HC |
| mean | 42,433 | 39,776 | 90,839 | 12.5 | 6.1 | 4.1 |
| median | 41,996 | 39,623 | 90,592 | 12.5 | 6.1 | 4.1 |
| S.D. | 15,418 |  |  |  |  |  |
| min |  |  |  |  |  |  |
| max |  |  |  |  |  |  |
| 2.50% | 28,622 | 33,031 | 74,605 | 12.0 | 5.8 | 3.7 |
| 97.50% | 59,021 | 47,300 | 108,454 | 13.0 | 6.4 | 4.5 |
| 2.5%HPD | 27,719 | 32,807 | 73,766 | 12.0 | 5.8 | 3.7 |
| 97.5%HPD | 57,662 | 46,934 | 107,418 | 13.0 | 6.4 | 4.5 |
|  |  |  |  |  |  |  |
|  |  |  |  |  |  |  |
|  |  |  |  |  |  |  |
|  |  |  |  |  |  |  |
| **292-locus P2 run 1** | *N*HC | *N*HCG | *N*HCGO | HCG-O | HC-G | HC |
| mean | 42,633 | 39,528 | 90,263 | 12.5 | 6.1 | 4.1 |
| median | 42,395 | 39,351 | 89,786 | 12.5 | 6.1 | 4.1 |
| S.D. | 15,057 |  |  |  |  |  |
| min |  |  |  |  |  |  |
| max |  |  |  |  |  |  |
| 2.50% | 28,698 | 33,054 | 74,095 | 12.0 | 5.8 | 3.7 |
| 97.50% | 58,327 | 46,958 | 108,569 | 13.0 | 6.4 | 4.5 |
| 2.5%HPD | 28,146 | 32,936 | 73,964 | 12.0 | 5.8 | 3.7 |
| 97.5%HPD | 57,538 | 46,781 | 108,405 | 13.0 | 6.4 | 4.5 |
|  |  |  |  |  |  |  |
|  |  |  |  |  |  |  |
| **292-locus P2 run2** | *N*HC | *N*HCG | *N*HCGO | HCG-O | HC-G | HC |
| mean | 42,890 | 39,505 | 90,559 | 12.5 | 6.1 | 4.1 |
| median | 42,481 | 39,375 | 90,247 | 12.5 | 6.1 | 4.1 |
| S.D. | 15,475 |  |  |  |  |  |
| min |  |  |  |  |  |  |
| max |  |  |  |  |  |  |
| 2.50% | 28,964 | 32,795 | 74,605 | 12.0 | 5.8 | 3.7 |
| 97.50% | 59,240 | 46,969 | 108,405 | 13.0 | 6.4 | 4.5 |
| 2.5%HPD | 28,337 | 32,406 | 73,783 | 12.0 | 5.8 | 3.7 |
| 97.5%HPD | 58,384 | 46,521 | 107,368 | 13.0 | 6.4 | 4.5 |
|  |  |  |  |  |  |  |
|  |  |  |  |  |  |  |
|  |  |  |  |  |  |  |
|  |  |  |  |  |  |  |
| **292-locus P3 run1** | *N*HC | *N*HCG | *N*HCGO | HCG-O | HC-G | HC |
| mean | 53,850 | 40,059 | 97,993 | 12.4 | 6.1 | 3.9 |
| median | 52,909 | 39,847 | 97,648 | 12.4 | 6.1 | 3.9 |
| S.D. | 20,875 |  |  |  |  |  |
| min |  |  |  |  |  |  |
| max |  |  |  |  |  |  |
| 2.50% | 36,017 | 33,561 | 80,543 | 11.9 | 5.8 | 3.4 |
| 97.50% | 77,386 | 47,594 | 117,401 | 12.9 | 6.4 | 4.3 |
| 2.5%HPD | 34,952 | 33,031 | 79,918 | 11.9 | 5.8 | 3.4 |
| 97.5%HPD | 75,703 | 47,005 | 116,661 | 12.9 | 6.4 | 4.3 |
|  |  |  |  |  |  |  |
|  |  |  |  |  |  |  |
| **292-locus P3 run2** | *N*HC | *N*HCG | *N*HCGO | HCG-O | HC-G | HC |
| mean | 54,221 | 39,835 | 98,109 | 12.4 | 6.1 | 3.9 |
| median | 53,479 | 39,705 | 97,796 | 12.4 | 6.1 | 3.9 |
| S.D. | 20,437 |  |  |  |  |  |
| min |  |  |  |  |  |  |
| max |  |  |  |  |  |  |
| 2.50% | 36,369 | 33,290 | 80,757 | 11.9 | 5.8 | 3.4 |
| 97.50% | 76,255 | 47,347 | 117,747 | 12.9 | 6.4 | 4.3 |
| 2.5%HPD | 35,399 | 33,007 | 80,066 | 11.9 | 5.8 | 3.4 |
| 97.5%HPD | 74,629 | 46,934 | 116,891 | 12.9 | 6.4 | 4.3 |
|  |  |  |  |  |  |  |
|  |  |  |  |  |  |  |
|  |  |  |  |  |  |  |
|  |  |  |  |  |  |  |
| **292-locus P4 run1** | *N*HC | *N*HCG | *N*HCGO | HCG-O | HC-G | HC |
| mean | 54,335 | 39,858 | 97,993 | 12.4 | 6.1 | 3.9 |
| median | 53,574 | 39,705 | 97,681 | 12.4 | 6.1 | 3.9 |
| S.D. | 20,418 |  |  |  |  |  |
| min |  |  |  |  |  |  |
| max |  |  |  |  |  |  |
| 2.50% | 36,388 | 33,361 | 80,395 | 11.9 | 5.8 | 3.4 |
| 97.50% | 76,188 | 47,453 | 117,895 | 12.9 | 6.4 | 4.3 |
| 2.5%HPD | 35,903 | 33,090 | 80,115 | 11.9 | 5.8 | 3.4 |
| 97.5%HPD | 75,447 | 47,075 | 117,451 | 12.9 | 6.4 | 4.3 |
|  |  |  |  |  |  |  |
|  |  |  |  |  |  |  |
| **292-locus P4 run2** | *N*HC | *N*HCG | *N*HCGO | HCG-O | HC-G | HC |
| mean | 53,622 | 40,106 | 97,878 | 12.4 | 6.1 | 3.9 |
| median | 52,947 | 39,976 | 97,648 | 12.4 | 6.1 | 3.9 |
| S.D. | 20,038 |  |  |  |  |  |
| min |  |  |  |  |  |  |
| max |  |  |  |  |  |  |
| 2.50% | 36,065 | 33,243 | 80,444 | 11.9 | 5.8 | 3.4 |
| 97.50% | 75,152 | 47,559 | 116,859 | 12.9 | 6.4 | 4.3 |
| 2.5%HPD | 34,068 | 33,113 | 79,342 | 11.9 | 5.8 | 3.4 |
| 97.5%HPD | 72,795 | 47,394 | 115,559 | 12.9 | 6.4 | 4.3 |
|  |  |  |  |  |  |  |
|  |  |  |  |  |  |  |
|  |  |  |  |  |  |  |
|  |  |  |  |  |  |  |
| **292-locus P5 run1** | *N*HC | *N*HCG | *N*HCGO | HCG-O | HC-G | HC |
| mean | 58,460 | 39,965 | 100,625 | 12.3 | 6.1 | 3.8 |
| median | 57,471 | 39,847 | 100,395 | 12.3 | 6.1 | 3.8 |
| S.D. | 22,395 |  |  |  |  |  |
| min |  |  |  |  |  |  |
| max |  |  |  |  |  |  |
| 2.50% | 39,316 | 33,231 | 82,352 | 11.8 | 5.8 | 3.3 |
| 97.50% | 82,871 | 47,583 | 120,559 | 12.8 | 6.4 | 4.2 |
| 2.5%HPD | 38,260 | 33,090 | 81,875 | 11.8 | 5.8 | 3.3 |
| 97.5%HPD | 81,445 | 47,358 | 119,753 | 12.8 | 6.4 | 4.2 |
|  |  |  |  |  |  |  |
|  |  |  |  |  |  |  |
| **292-locus P5 run2** | *N*HC | *N*HCG | *N*HCGO | HCG-O | HC-G | HC |
| mean | 58,783 | 40,035 | 100,411 | 12.3 | 6.1 | 3.8 |
| median | 57,975 | 39,906 | 100,099 | 12.3 | 6.1 | 3.8 |
| S.D. | 22,129 |  |  |  |  |  |
| min |  |  |  |  |  |  |
| max |  |  |  |  |  |  |
| 2.50% | 39,468 | 33,231 | 82,401 | 11.8 | 5.8 | 3.3 |
| 97.50% | 82,842 | 47,689 | 120,181 | 12.8 | 6.4 | 4.2 |
| 2.5%HPD | 37,624 | 33,125 | 81,875 | 11.9 | 5.8 | 3.3 |
| 97.5%HPD | 80,143 | 47,535 | 119,490 | 12.9 | 6.4 | 4.2 |
