# Supplementary material for: In silico phylogenomics using complete genomes: a case study on the evolution of hominoids
Source: HighWire-hosted journal article supplement (doi:10.1101/gr.203950.115), 2016-07-19
Supplement: Supplemental_Table_S8.docx [file Supplemental_Table_S8.docx]

**Table S8.** Posterior probabilities and associated statistics for parameters estimated from the AL 53 dataset from (Chen and Li 2001).We used the program BPP2.2 (Yang 2012) to estimate three ancestral population size (**) and three speciation (**) parameters from genomic data for the hominoids. See Table S5 for descriptions of prior combos (P1-P5) and parameters. We repeated each analysis once (runs 1 and 2) to check for convergence.

| **53-locus P1 run 1** | HC | HCG | HCGO | HCG-O | HC-G | HC |
| --- | --- | --- | --- | --- | --- | --- |
| mean | 0.00181 | 0.003517 | 0.001958 | 0.013922 | 0.005919 | 0.004856 |
| median | 0.001702 | 0.003481 | 0.001872 | 0.013949 | 0.005896 | 0.004868 |
| S.D. | 0.000897 | 0.000726 | 0.001288 | 0.000869 | 0.000425 | 0.000434 |
| min | 0.000145 | 0.001109 | 0.000066 | 0.010565 | 0.004503 | 0.00291 |
| max | 0.008076 | 0.006763 | 0.00705 | 0.016732 | 0.007751 | 0.006316 |
| 2.50% | 0.000403 | 0.002189 | 0.000086 | 0.012182 | 0.00514 | 0.003976 |
| 97.50% | 0.003847 | 0.005051 | 0.004624 | 0.015499 | 0.006798 | 0.005675 |
| 2.5%HPD | 0.000299 | 0.002177 | 0.000066 | 0.012227 | 0.005123 | 0.003948 |
| 97.5%HPD | 0.00354 | 0.005022 | 0.004228 | 0.015534 | 0.006775 | 0.005641 |
|  |  |  |  |  |  |  |
|  |  |  |  |  |  |  |
| **53-locus P1 run 2** | HC | HCG | HCGO | HCG-O | HC-G | HC |
| mean | 0.001946 | 0.00348 | 0.001942 | 0.013941 | 0.005935 | 0.004798 |
| median | 0.001814 | 0.003447 | 0.001843 | 0.01398 | 0.005914 | 0.004811 |
| S.D. | 0.000887 | 0.00073 | 0.001255 | 0.000851 | 0.000438 | 0.000421 |
| min | 0.000221 | 0.001279 | 0.000163 | 0.010501 | 0.004496 | 0.002877 |
| max | 0.007919 | 0.006875 | 0.007193 | 0.016656 | 0.007845 | 0.006306 |
| 2.50% | 0.00059 | 0.002147 | 0.000225 | 0.012236 | 0.005127 | 0.003928 |
| 97.50% | 0.00397 | 0.005021 | 0.004565 | 0.015465 | 0.006836 | 0.005581 |
| 2.5%HPD | 0.000397 | 0.002101 | 0.000168 | 0.012229 | 0.005091 | 0.003981 |
| 97.5%HPD | 0.003637 | 0.004958 | 0.004134 | 0.015455 | 0.006786 | 0.00563 |
|  |  |  |  |  |  |  |
|  |  |  |  |  |  |  |
|  |  |  |  |  |  |  |
|  |  |  |  |  |  |  |
| **53-locus P2 run 1** | HC | HCG | HCGO | HCG-O | HC-G | HC |
| mean | 0.001877 | 0.003483 | 0.001923 | 0.013993 | 0.005946 | 0.004834 |
| median | 0.001751 | 0.003455 | 0.00178 | 0.014036 | 0.005925 | 0.004847 |
| S.D. | 0.000896 | 0.000709 | 0.00119 | 0.000828 | 0.000427 | 0.000438 |
| min | 0.000208 | 0.001052 | 0.000128 | 0.010995 | 0.004425 | 0.002971 |
| max | 0.007264 | 0.007074 | 0.00684 | 0.016658 | 0.008177 | 0.006485 |
| 2.50% | 0.000514 | 0.002173 | 0.000302 | 0.012311 | 0.005157 | 0.003932 |
| 97.50% | 0.003962 | 0.00496 | 0.004503 | 0.015472 | 0.006835 | 0.005663 |
| 2.5%HPD | 0.000379 | 0.002107 | 0.000199 | 0.012373 | 0.005172 | 0.003943 |
| 97.5%HPD | 0.00363 | 0.004886 | 0.004091 | 0.015521 | 0.006847 | 0.005671 |
|  |  |  |  |  |  |  |
|  |  |  |  |  |  |  |
| **53-locus P2 run 2** | HC | HCG | HCGO | HCG-O | HC-G | HC |
| mean | 0.0019 | 0.003498 | 0.001881 | 0.014027 | 0.00593 | 0.004814 |
| median | 0.001779 | 0.003469 | 0.001741 | 0.014069 | 0.005911 | 0.004829 |
| S.D. | 0.000883 | 0.000721 | 0.001115 | 0.00079 | 0.000431 | 0.000425 |
| min | 0.00015 | 0.001104 | 0.000124 | 0.010877 | 0.004476 | 0.002918 |
| max | 0.006833 | 0.006709 | 0.006772 | 0.017075 | 0.007842 | 0.006418 |
| 2.50% | 0.000555 | 0.00218 | 0.000289 | 0.012431 | 0.005132 | 0.003936 |
| 97.50% | 0.003931 | 0.004995 | 0.004331 | 0.015469 | 0.006813 | 0.005599 |
| 2.5%HPD | 0.000463 | 0.002078 | 0.000145 | 0.012533 | 0.005128 | 0.00395 |
| 97.5%HPD | 0.003659 | 0.004879 | 0.003899 | 0.015554 | 0.006803 | 0.005609 |
|  |  |  |  |  |  |  |
|  |  |  |  |  |  |  |
|  |  |  |  |  |  |  |
|  |  |  |  |  |  |  |
| **53-locus P3 run 1** | HC | HCG | HCGO | HCG-O | HC-G | HC |
| mean | 0.003998 | 0.003954 | 0.004796 | 0.012693 | 0.00592 | 0.004233 |
| median | 0.003675 | 0.003901 | 0.004747 | 0.012666 | 0.005908 | 0.004258 |
| S.D. | 0.002031 | 0.000879 | 0.001479 | 0.000793 | 0.000438 | 0.000565 |
| min | 0.00037 | 0.0014 | 0.000542 | 0.010125 | 0.004442 | 0.001971 |
| max | 0.016106 | 0.009587 | 0.012014 | 0.015931 | 0.008133 | 0.005981 |
| 2.50% | 0.000989 | 0.002414 | 0.00189 | 0.011198 | 0.005099 | 0.003055 |
| 97.50% | 0.008812 | 0.005822 | 0.007866 | 0.014328 | 0.006813 | 0.00527 |
| 2.5%HPD | 0.000555 | 0.002276 | 0.001742 | 0.011172 | 0.005093 | 0.003124 |
| 97.5%HPD | 0.007944 | 0.005646 | 0.00771 | 0.014284 | 0.006802 | 0.00531 |
|  | 783.1 | 1609.8 | 693.7 | 788 | 1916.2 | 938.6 |
|  |  |  |  |  |  |  |
|  |  |  |  |  |  |  |
| **53-locus P3 run 2** | HC | HCG | HCGO | HCG-O | HC-G | HC |
| mean | 0.004091 | 0.003943 | 0.004768 | 0.012701 | 0.005934 | 0.004217 |
| median | 0.003758 | 0.003873 | 0.004713 | 0.012675 | 0.005926 | 0.00425 |
| S.D. | 0.002021 | 0.000886 | 0.001459 | 0.000779 | 0.000434 | 0.00055 |
| min | 0.000347 | 0.001535 | 0.000527 | 0.009829 | 0.004329 | 0.001521 |
| max | 0.01853 | 0.008765 | 0.012396 | 0.01604 | 0.007685 | 0.006511 |
| 2.50% | 0.001171 | 0.002392 | 0.001967 | 0.011206 | 0.005119 | 0.003067 |
| 97.50% | 0.008993 | 0.005873 | 0.007823 | 0.01431 | 0.006801 | 0.005213 |
| 2.5%HPD | 0.000844 | 0.002258 | 0.001872 | 0.011154 | 0.005114 | 0.003109 |
| 97.5%HPD | 0.008111 | 0.005689 | 0.007675 | 0.014234 | 0.00679 | 0.005248 |
|  |  |  |  |  |  |  |
|  |  |  |  |  |  |  |
|  |  |  |  |  |  |  |
|  |  |  |  |  |  |  |
| **53-locus P4 run 1** | HC | HCG | HCGO | HCG-O | HC-G | HC |
| mean | 0.004123 | 0.003928 | 0.00471 | 0.012784 | 0.005942 | 0.004211 |
| median | 0.003775 | 0.003865 | 0.004626 | 0.012779 | 0.005927 | 0.004244 |
| S.D. | 0.00204 | 0.000879 | 0.00142 | 0.000768 | 0.000435 | 0.000549 |
| min | 0.00056 | 0.001093 | 0.000788 | 0.009956 | 0.004184 | 0.001675 |
| max | 0.014134 | 0.009099 | 0.013257 | 0.015826 | 0.007723 | 0.006044 |
| 2.50% | 0.00131 | 0.002395 | 0.00214 | 0.011293 | 0.005124 | 0.003051 |
| 97.50% | 0.009192 | 0.00583 | 0.007708 | 0.01431 | 0.006829 | 0.005188 |
| 2.5%HPD | 0.000947 | 0.002301 | 0.002055 | 0.011293 | 0.005127 | 0.003107 |
| 97.5%HPD | 0.008223 | 0.00571 | 0.007609 | 0.01431 | 0.00683 | 0.005225 |
|  |  |  |  |  |  |  |
|  |  |  |  |  |  |  |
| **53-locus P4 run 2** | HC | HCG | HCGO | HCG-O | HC-G | HC |
| mean | 0.003931 | 0.004006 | 0.004529 | 0.012869 | 0.005914 | 0.004248 |
| median | 0.003632 | 0.003932 | 0.004495 | 0.012839 | 0.005909 | 0.004267 |
| S.D. | 0.00196 | 0.000881 | 0.001462 | 0.000798 | 0.00044 | 0.000548 |
| min | 0.000359 | 0.001442 | 0.000422 | 0.010033 | 0.004427 | 0.001867 |
| max | 0.015152 | 0.008286 | 0.011768 | 0.015994 | 0.007851 | 0.005955 |
| 2.50% | 0.001001 | 0.002491 | 0.001528 | 0.01137 | 0.005081 | 0.003106 |
| 97.50% | 0.008622 | 0.005922 | 0.007497 | 0.014536 | 0.006816 | 0.005263 |
| 2.5%HPD | 0.000611 | 0.002325 | 0.001755 | 0.011306 | 0.005078 | 0.003177 |
| 97.5%HPD | 0.007657 | 0.005691 | 0.007672 | 0.014446 | 0.006807 | 0.005323 |
|  |  |  |  |  |  |  |
|  |  |  |  |  |  |  |
|  |  |  |  |  |  |  |
|  |  |  |  |  |  |  |
| **53-locus P5 run 1** | HC | HCG | HCGO | HCG-O | HC-G | HC |
| mean | 0.006697 | 0.004068 | 0.00559 | 0.012459 | 0.005919 | 0.003794 |
| median | 0.005845 | 0.003977 | 0.005489 | 0.012448 | 0.005909 | 0.003825 |
| S.D. | 0.004076 | 0.000914 | 0.001605 | 0.000778 | 0.000435 | 0.000675 |
| min | 0.000835 | 0.001635 | 0.0014 | 0.009262 | 0.00432 | 0.000004 |
| max | 0.04235 | 0.009119 | 0.015358 | 0.015457 | 0.007603 | 0.006212 |
| 2.50% | 0.001664 | 0.002532 | 0.002696 | 0.010968 | 0.005081 | 0.002375 |
| 97.50% | 0.016509 | 0.006116 | 0.008999 | 0.014039 | 0.006791 | 0.005017 |
| 2.5%HPD | 0.000896 | 0.00243 | 0.002537 | 0.011012 | 0.005063 | 0.002415 |
| 97.5%HPD | 0.013906 | 0.005938 | 0.008798 | 0.01407 | 0.006767 | 0.005036 |
|  |  |  |  |  |  |  |
|  |  |  |  |  |  |  |
| **53-locus P5 run 2** | HC | HCG | HCGO | HCG-O | HC-G | HC |
| mean | 0.006698 | 0.004114 | 0.005584 | 0.012451 | 0.0059 | 0.003826 |
| median | 0.005456 | 0.004034 | 0.005483 | 0.012438 | 0.005888 | 0.003889 |
| S.D. | 0.005343 | 0.000946 | 0.001594 | 0.000767 | 0.000447 | 0.000708 |
| min | 0.000614 | 0.001495 | 0.000578 | 0.009591 | 0.004208 | 0.000104 |
| max | 0.064845 | 0.009424 | 0.014133 | 0.015796 | 0.008046 | 0.005807 |
| 2.50% | 0.001513 | 0.002492 | 0.002685 | 0.010976 | 0.005041 | 0.002244 |
| 97.50% | 0.01915 | 0.006203 | 0.008945 | 0.014034 | 0.006795 | 0.005012 |
| 2.5%HPD | 0.000825 | 0.002438 | 0.002549 | 0.010948 | 0.005001 | 0.002421 |
| 97.5%HPD | 0.015098 | 0.006109 | 0.008742 | 0.013986 | 0.00674 | 0.005128 |
