# Supplementary material for: In silico phylogenomics using complete genomes: a case study on the evolution of hominoids
Source: HighWire-hosted journal article supplement (doi:10.1101/gr.203950.115), 2016-07-19
Supplement: Supplemental_Table_S9.docx [file Supplemental_Table_S9.docx]

**Table S9.** Posterior probabilities and associated statistics for parameters estimated from the AL 53 dataset from (Chen and Li 2001) converted into demographic and time units. We converted the original parameter estimates from Table S6 into demographic and absolute time units. See Table S5 for descriptions of prior combos (P1-P5), parameters, and details about parameter conversions. Speciation times are in units of millions of years ago.

| **53-locus P1 run 1** | *N*HC | *N*HCG | *N*HCGO | **HCG-O | **HC-G | **HC |
| --- | --- | --- | --- | --- | --- | --- |
| mean | 17,205 | 41,474 | 32,204 | 13.9 | 5.9 | 4.9 |
| median | 16,179 | 41,050 | 30,789 | 13.9 | 5.9 | 4.9 |
| S.D. | 17,053 |  |  |  |  |  |
| min |  |  |  |  |  |  |
| max |  |  |  |  |  |  |
| 0.025 | 3,831 | 25,814 | 1,414 | 12.2 | 5.1 | 4.0 |
| 0.975 | 36,568 | 59,564 | 76,053 | 15.5 | 6.8 | 5.7 |
| 2.5%HPD | 2,842 | 25,672 | 1,086 | 12.2 | 5.1 | 3.9 |
| 97.5%HPD | 33,650 | 59,222 | 69,539 | 15.5 | 6.8 | 5.6 |
|  |  |  |  |  |  |  |
|  |  |  |  |  |  |  |
| **53-locus P1 run 2** | *N*HC | *N*HCG | *N*HCGO | **HCG-O | **HC-G | **HC |
| mean | 18,498 | 41,038 | 31,941 | 13.9 | 5.9 | 4.8 |
| median | 17,243 | 40,649 | 30,313 | 14.0 | 5.9 | 4.8 |
| S.D. | 16,863 |  |  |  |  |  |
| min |  |  |  |  |  |  |
| max |  |  |  |  |  |  |
| 0.025 | 5,608 | 25,318 | 3,701 | 12.2 | 5.1 | 3.9 |
| 0.975 | 37,738 | 59,210 | 75,082 | 15.5 | 6.8 | 5.6 |
| 2.5%HPD | 3,774 | 24,776 | 2,763 | 12.2 | 5.1 | 4.0 |
| 97.5%HPD | 34,572 | 58,467 | 67,993 | 15.5 | 6.8 | 5.6 |
|  |  |  |  |  |  |  |
|  |  |  |  |  |  |  |
|  |  |  |  |  |  |  |
|  |  |  |  |  |  |  |
| **53-locus P2 run 1** | *N*HC | *N*HCG | *N*HCGO | **HCG-O | **HC-G | **HC |
| mean | 17,842 | 41,073 | 31,628 | 14.0 | 5.9 | 4.8 |
| median | 16,644 | 40,743 | 29,276 | 14.0 | 5.9 | 4.8 |
| S.D. | 17,034 |  |  |  |  |  |
| min |  |  |  |  |  |  |
| max |  |  |  |  |  |  |
| 0.025 | 4,886 | 25,625 | 4,967 | 12.3 | 5.2 | 3.9 |
| 0.975 | 37,662 | 58,491 | 74,063 | 15.5 | 6.8 | 5.7 |
| 2.5%HPD | 3,603 | 24,847 | 3,273 | 12.4 | 5.2 | 3.9 |
| 97.5%HPD | 34,506 | 57,618 | 67,286 | 15.5 | 6.8 | 5.7 |
|  |  |  |  |  |  |  |
|  |  |  |  |  |  |  |
| **53-locus P2 run 2** | *N*HC | *N*HCG | *N*HCGO | **HCG-O | **HC-G | **HC |
| mean | 18,061 | 41,250 | 30,938 | 14.0 | 5.9 | 4.8 |
| median | 16,911 | 40,908 | 28,635 | 14.1 | 5.9 | 4.8 |
| S.D. | 16,787 |  |  |  |  |  |
| min |  |  |  |  |  |  |
| max |  |  |  |  |  |  |
| 0.025 | 5,276 | 25,708 | 4,753 | 12.4 | 5.1 | 3.9 |
| 0.975 | 37,367 | 58,903 | 71,234 | 15.5 | 6.8 | 5.6 |
| 2.5%HPD | 4,401 | 24,505 | 2,385 | 12.5 | 5.1 | 4.0 |
| 97.5%HPD | 34,781 | 57,535 | 64,128 | 15.6 | 6.8 | 5.6 |
|  |  |  |  |  |  |  |
|  |  |  |  |  |  |  |
|  |  |  |  |  |  |  |
|  |  |  |  |  |  |  |
| **53-locus P3 run 1** | *N*HC | *N*HCG | *N*HCGO | **HCG-O | **HC-G | **HC |
| mean | 38,004 | 46,627 | 78,882 | 12.7 | 5.9 | 4.2 |
| median | 34,933 | 46,002 | 78,076 | 12.7 | 5.9 | 4.3 |
| S.D. | 38,612 |  |  |  |  |  |
| min |  |  |  |  |  |  |
| max |  |  |  |  |  |  |
| 0.025 | 9,401 | 28,467 | 31,086 | 11.2 | 5.1 | 3.1 |
| 0.975 | 83,764 | 68,656 | 129,375 | 14.3 | 6.8 | 5.3 |
| 2.5%HPD | 5,276 | 26,840 | 28,651 | 11.2 | 5.1 | 3.1 |
| 97.5%HPD | 75,513 | 66,580 | 126,809 | 14.3 | 6.8 | 5.3 |
|  |  |  |  |  |  |  |
|  |  |  |  |  |  |  |
|  |  |  |  |  |  |  |
| **53-locus P3 run 2** | *N*HC | *N*HCG | *N*HCGO | **HCG-O | **HC-G | **HC |
| mean | 38,888 | 46,498 | 78,421 | 12.7 | 5.9 | 4.2 |
| median | 35,722 | 45,672 | 77,516 | 12.7 | 5.9 | 4.3 |
| S.D. | 38,422 |  |  |  |  |  |
| min |  |  |  |  |  |  |
| max |  |  |  |  |  |  |
| 0.025 | 11,131 | 28,208 | 32,352 | 11.2 | 5.1 | 3.1 |
| 0.975 | 85,485 | 69,257 | 128,668 | 14.3 | 6.8 | 5.2 |
| 2.5%HPD | 8,023 | 26,627 | 30,789 | 11.2 | 5.1 | 3.1 |
| 97.5%HPD | 77,101 | 67,087 | 126,234 | 14.2 | 6.8 | 5.2 |
|  |  |  |  |  |  |  |
|  |  |  |  |  |  |  |
|  |  |  |  |  |  |  |
|  |  |  |  |  |  |  |
| **53-locus P4 run 1** | *N*HC | *N*HCG | *N*HCGO | **HCG-O | **HC-G | **HC |
| mean | 39,192 | 46,321 | 77,467 | 12.8 | 5.9 | 4.2 |
| median | 35,884 | 45,578 | 76,086 | 12.8 | 5.9 | 4.2 |
| S.D. | 38,783 |  |  |  |  |  |
| min |  |  |  |  |  |  |
| max |  |  |  |  |  |  |
| 0.025 | 12,452 | 28,243 | 35,197 | 11.3 | 5.1 | 3.1 |
| 0.975 | 87,376 | 68,750 | 126,776 | 14.3 | 6.8 | 5.2 |
| 2.5%HPD | 9,002 | 27,134 | 33,799 | 11.3 | 5.1 | 3.1 |
| 97.5%HPD | 78,165 | 67,335 | 125,148 | 14.3 | 6.8 | 5.2 |
|  |  |  |  |  |  |  |
|  |  |  |  |  |  |  |
| **53-locus P4 run 2** | *N*HC | *N*HCG | *N*HCGO | **HCG-O | **HC-G | **HC |
| mean | 37,367 | 47,241 | 74,490 | 12.9 | 5.9 | 4.2 |
| median | 34,525 | 46,368 | 73,931 | 12.8 | 5.9 | 4.3 |
| S.D. | 37,262 |  |  |  |  |  |
| min |  |  |  |  |  |  |
| max |  |  |  |  |  |  |
| 0.025 | 9,515 | 29,375 | 25,132 | 11.4 | 5.1 | 3.1 |
| 0.975 | 81,958 | 69,835 | 123,306 | 14.5 | 6.8 | 5.3 |
| 2.5%HPD | 5,808 | 27,417 | 28,865 | 11.3 | 5.1 | 3.2 |
| 97.5%HPD | 72,785 | 67,111 | 126,184 | 14.4 | 6.8 | 5.3 |
|  |  |  |  |  |  |  |
|  |  |  |  |  |  |  |
|  |  |  |  |  |  |  |
|  |  |  |  |  |  |  |
| **53-locus P5 run 1** | *N*HC | *N*HCG | *N*HCGO | **HCG-O | **HC-G | **HC |
| mean | 63,660 | 47,972 | 91,941 | 12.5 | 5.9 | 3.8 |
| median | 55,561 | 46,899 | 90,280 | 12.4 | 5.9 | 3.8 |
| S.D. | 77,490 |  |  |  |  |  |
| min |  |  |  |  |  |  |
| max |  |  |  |  |  |  |
| 0.025 | 15,817 | 29,858 | 44,342 | 11.0 | 5.1 | 2.4 |
| 0.975 | 156,930 | 72,123 | 148,010 | 14.0 | 6.8 | 5.0 |
| 2.5%HPD | 8,517 | 28,656 | 41,727 | 11.0 | 5.1 | 2.4 |
| 97.5%HPD | 132,186 | 70,024 | 144,704 | 14.1 | 6.8 | 5.0 |
|  |  |  |  |  |  |  |
|  |  |  |  |  |  |  |
| **53-locus P5 run 2** | *N*HC | *N*HCG | *N*HCGO | **HCG-O | **HC-G | **HC |
| mean | 63,669 | 48,514 | 91,842 | 12.5 | 5.9 | 3.8 |
| median | 51,863 | 47,571 | 90,181 | 12.4 | 5.9 | 3.9 |
| S.D. | 101,578 |  |  |  |  |  |
| min |  |  |  |  |  |  |
| max |  |  |  |  |  |  |
| 0.025 | 14,382 | 29,387 | 44,161 | 11.0 | 5.0 | 2.2 |
| 0.975 | 182,034 | 73,149 | 147,122 | 14.0 | 6.8 | 5.0 |
| 2.5%HPD | 7,842 | 28,750 | 41,924 | 10.9 | 5.0 | 2.4 |
| 97.5%HPD | 143,517 | 72,040 | 143,783 | 14.0 | 6.7 | 5.1 |
