# Supplementary material for: In silico phylogenomics using complete genomes: a case study on the evolution of hominoids
Source: HighWire-hosted journal article supplement (doi:10.1101/gr.203950.115), 2016-07-19
Supplement: Supplemental_Table_S10.docx [file Supplemental_Table_S10.docx]

**Table S10.** Posterior probabilities and associated statistics for parameters estimated from our AE 171 dataset. We used the program BPP2.2 (Yang 2001) to estimate three ancestral population size (**) and three speciation (**) parameters from genomic data for the hominoids. See Table S5 for descriptions of prior combos (P1-P5) and parameters. We repeated each analysis once (runs 1 and 2) to check for convergence.

| 171 loci-P1 run1 | HC | HCG | HCGO | HCG-O | HC-G | HC |
| --- | --- | --- | --- | --- | --- | --- |
| mean | 0.001481 | 0.002199 | 0.006918 | 0.006079 | 0.003443 | 0.002575 |
| median | 0.001444 | 0.002175 | 0.006892 | 0.00608 | 0.003443 | 0.002577 |
| S.D. | 0.000489 | 0.000339 | 0.000627 | 0.000232 | 0.000159 | 0.000177 |
| min | 0.000387 | 0.001206 | 0.00471 | 0.005184 | 0.002853 | 0.001788 |
| max | 0.0041 | 0.003707 | 0.009957 | 0.007074 | 0.004042 | 0.003178 |
| 0.025 | 0.000626 | 0.001571 | 0.005776 | 0.005627 | 0.003137 | 0.002221 |
| 0.975 | 0.002556 | 0.002919 | 0.00823 | 0.00653 | 0.003764 | 0.002912 |
| 2.5%HPD | 0.000508 | 0.001526 | 0.005742 | 0.005625 | 0.003122 | 0.002233 |
| 97.5%HPD | 0.002358 | 0.002848 | 0.008175 | 0.006525 | 0.003747 | 0.002919 |
|  |  |  |  |  |  |  |
|  |  |  |  |  |  |  |
|  |  |  |  |  |  |  |
| 171 loci-P1 run2 | HC | HCG | HCGO | HCG-O | HC-G | HC |
| mean | 0.001467 | 0.002207 | 0.006949 | 0.006071 | 0.003437 | 0.002578 |
| median | 0.001418 | 0.002188 | 0.006927 | 0.006065 | 0.003435 | 0.002587 |
| S.D. | 0.000478 | 0.000343 | 0.000633 | 0.000236 | 0.000161 | 0.000174 |
| min | 0.000484 | 0.001062 | 0.004527 | 0.005149 | 0.002868 | 0.001833 |
| max | 0.004093 | 0.003861 | 0.009592 | 0.007031 | 0.004211 | 0.003224 |
| 0.025 | 0.000682 | 0.001581 | 0.005765 | 0.005624 | 0.003127 | 0.002217 |
| 0.975 | 0.002531 | 0.002927 | 0.008249 | 0.006547 | 0.003756 | 0.002898 |
| 2.5%HPD | 0.000612 | 0.001542 | 0.00571 | 0.005614 | 0.003125 | 0.00223 |
| 97.5%HPD | 0.002389 | 0.002871 | 0.008178 | 0.006533 | 0.003753 | 0.00291 |
|  |  |  |  |  |  |  |
|  |  |  |  |  |  |  |
|  |  |  |  |  |  |  |
| 171 loci-P2 run1 | HC | HCG | HCGO | HCG-O | HC-G | HC |
| mean | 0.001467 | 0.002192 | 0.006921 | 0.006079 | 0.003449 | 0.002584 |
| median | 0.001419 | 0.002177 | 0.006898 | 0.006082 | 0.003448 | 0.002589 |
| S.D. | 0.000483 | 0.000338 | 0.000637 | 0.000238 | 0.000161 | 0.000176 |
| min | 0.00041 | 0.001208 | 0.004798 | 0.005087 | 0.002886 | 0.001881 |
| max | 0.003768 | 0.003575 | 0.009478 | 0.007085 | 0.004016 | 0.003241 |
| 0.025 | 0.000688 | 0.001568 | 0.005751 | 0.005616 | 0.003141 | 0.002222 |
| 0.975 | 0.00254 | 0.002899 | 0.008223 | 0.00654 | 0.003764 | 0.002919 |
| 2.5%HPD | 0.000632 | 0.001524 | 0.005722 | 0.005626 | 0.003141 | 0.002241 |
| 97.5%HPD | 0.002437 | 0.002846 | 0.00819 | 0.006547 | 0.003764 | 0.002933 |
|  |  |  |  |  |  |  |
|  |  |  |  |  |  |  |
|  |  |  |  |  |  |  |
| 171 loci-P2 run2 | HC | HCG | HCGO | HCG-O | HC-G | HC |
| mean | 0.00149 | 0.002201 | 0.006921 | 0.006083 | 0.003444 | 0.002575 |
| median | 0.001451 | 0.002178 | 0.006891 | 0.00608 | 0.003447 | 0.002581 |
| S.D. | 0.000499 | 0.000348 | 0.000635 | 0.000237 | 0.000165 | 0.000178 |
| min | 0.000223 | 0.001175 | 0.004877 | 0.005216 | 0.002803 | 0.001819 |
| max | 0.004556 | 0.003897 | 0.00971 | 0.006984 | 0.004093 | 0.003198 |
| 0.025 | 0.000648 | 0.001577 | 0.005748 | 0.005628 | 0.003118 | 0.002216 |
| 0.975 | 0.002565 | 0.002938 | 0.008245 | 0.006551 | 0.003765 | 0.002909 |
| 2.5%HPD | 0.000602 | 0.001521 | 0.005747 | 0.005612 | 0.003118 | 0.002226 |
| 97.5%HPD | 0.002459 | 0.002869 | 0.008241 | 0.006534 | 0.003765 | 0.002917 |
|  |  |  |  |  |  |  |
|  |  |  |  |  |  |  |
|  |  |  |  |  |  |  |
| 171 loci-P3 run1 | HC | HCG | HCGO | HCG-O | HC-G | HC |
| mean | 0.001868 | 0.002229 | 0.007578 | 0.005992 | 0.003444 | 0.002458 |
| median | 0.001799 | 0.002209 | 0.00754 | 0.005992 | 0.003447 | 0.002462 |
| S.D. | 0.000649 | 0.000362 | 0.000723 | 0.000235 | 0.000164 | 0.000202 |
| min | 0.00039 | 0.001034 | 0.005102 | 0.005103 | 0.002776 | 0.001508 |
| max | 0.006074 | 0.003815 | 0.011181 | 0.006926 | 0.004162 | 0.003228 |
| 0.025 | 0.000627 | 0.00159 | 0.00627 | 0.005521 | 0.003123 | 0.002049 |
| 0.975 | 0.003313 | 0.003 | 0.009088 | 0.006447 | 0.003765 | 0.002856 |
| 2.5%HPD | 0.000501 | 0.001553 | 0.006249 | 0.005523 | 0.00311 | 0.002045 |
| 97.5%HPD | 0.003048 | 0.002953 | 0.009059 | 0.006448 | 0.00375 | 0.002848 |
|  |  |  |  |  |  |  |
|  |  |  |  |  |  |  |
|  |  |  |  |  |  |  |
| 171 loci-P3 run2 | HC | HCG | HCGO | HCG-O | HC-G | HC |
| mean | 0.001811 | 0.002247 | 0.007607 | 0.00598 | 0.003437 | 0.002474 |
| median | 0.001753 | 0.002215 | 0.00757 | 0.005979 | 0.003438 | 0.002481 |
| S.D. | 0.000632 | 0.000359 | 0.000723 | 0.000234 | 0.000165 | 0.000197 |
| min | 0.000467 | 0.001064 | 0.005381 | 0.00511 | 0.002758 | 0.00165 |
| max | 0.005599 | 0.004178 | 0.010724 | 0.006912 | 0.004027 | 0.003164 |
| 0.025 | 0.000679 | 0.001613 | 0.006293 | 0.005521 | 0.003115 | 0.002069 |
| 0.975 | 0.003219 | 0.003018 | 0.009119 | 0.006442 | 0.00376 | 0.002848 |
| 2.5%HPD | 0.000494 | 0.001567 | 0.006281 | 0.005516 | 0.0031 | 0.002082 |
| 97.5%HPD | 0.002941 | 0.002953 | 0.009099 | 0.006434 | 0.003742 | 0.002856 |
|  |  |  |  |  |  |  |
|  |  |  |  |  |  |  |
|  |  |  |  |  |  |  |
| 171 loci-P4 run1 | HC | HCG | HCGO | HCG-O | HC-G | HC |
| mean | 0.001817 | 0.002227 | 0.007592 | 0.005984 | 0.003446 | 0.002471 |
| median | 0.001754 | 0.002207 | 0.007552 | 0.005979 | 0.003443 | 0.002478 |
| S.D. | 0.000567 | 0.000348 | 0.000716 | 0.000227 | 0.00016 | 0.000182 |
| min | 0.00058 | 0.001146 | 0.00544 | 0.005102 | 0.002833 | 0.001676 |
| max | 0.005617 | 0.003757 | 0.010548 | 0.006917 | 0.004094 | 0.003087 |
| 0.025 | 0.000896 | 0.001589 | 0.006287 | 0.005548 | 0.00314 | 0.002092 |
| 0.975 | 0.00313 | 0.002959 | 0.009116 | 0.00644 | 0.003768 | 0.002803 |
| 2.5%HPD | 0.000761 | 0.001558 | 0.006167 | 0.00555 | 0.003134 | 0.002109 |
| 97.5%HPD | 0.002897 | 0.002927 | 0.008974 | 0.006441 | 0.003759 | 0.002816 |
|  |  |  |  |  |  |  |
|  |  |  |  |  |  |  |
|  |  |  |  |  |  |  |
| 171 loci-P4 run2 | HC | HCG | HCGO | HCG-O | HC-G | HC |
| mean | 0.001837 | 0.002236 | 0.007616 | 0.005975 | 0.003441 | 0.002468 |
| median | 0.001754 | 0.002219 | 0.007585 | 0.005974 | 0.00344 | 0.002475 |
| S.D. | 0.000641 | 0.000346 | 0.000726 | 0.000233 | 0.000155 | 0.0002 |
| min | 0.000497 | 0.001257 | 0.005176 | 0.005147 | 0.002912 | 0.001675 |
| max | 0.005648 | 0.003677 | 0.010988 | 0.006809 | 0.004018 | 0.003106 |
| 0.025 | 0.000788 | 0.001611 | 0.006299 | 0.005525 | 0.003142 | 0.002051 |
| 0.975 | 0.003326 | 0.002966 | 0.009153 | 0.006442 | 0.003749 | 0.002843 |
| 2.5%HPD | 0.000717 | 0.001608 | 0.006239 | 0.005505 | 0.003138 | 0.002074 |
| 97.5%HPD | 0.003119 | 0.002959 | 0.009066 | 0.006415 | 0.003743 | 0.002856 |
|  |  |  |  |  |  |  |
|  |  |  |  |  |  |  |
|  |  |  |  |  |  |  |
| 171 loci-P5 run1 | HC | HCG | HCGO | HCG-O | HC-G | HC |
| mean | 0.001923 | 0.002259 | 0.007782 | 0.005956 | 0.003435 | 0.002443 |
| median | 0.00183 | 0.002237 | 0.007748 | 0.005955 | 0.003433 | 0.002452 |
| S.D. | 0.000671 | 0.000365 | 0.000734 | 0.00023 | 0.000164 | 0.000198 |
| min | 0.000576 | 0.001049 | 0.005449 | 0.005086 | 0.002836 | 0.001541 |
| max | 0.005502 | 0.004265 | 0.010727 | 0.006815 | 0.004211 | 0.003103 |
| 0.025 | 0.000872 | 0.001596 | 0.006427 | 0.005508 | 0.003116 | 0.00203 |
| 0.975 | 0.00347 | 0.003025 | 0.009307 | 0.006413 | 0.003757 | 0.002805 |
| 2.5%HPD | 0.000741 | 0.001585 | 0.006391 | 0.005499 | 0.003115 | 0.002046 |
| 97.5%HPD | 0.003188 | 0.003011 | 0.009245 | 0.006402 | 0.003755 | 0.002815 |
|  |  |  |  |  |  |  |
|  |  |  |  |  |  |  |
|  |  |  |  |  |  |  |
| 171 loci-P5 run2 | HC | HCG | HCGO | HCG-O | HC-G | HC |
| mean | 0.001984 | 0.002248 | 0.007807 | 0.00595 | 0.003441 | 0.002426 |
| median | 0.001899 | 0.002229 | 0.007776 | 0.005947 | 0.003439 | 0.002433 |
| S.D. | 0.000692 | 0.000367 | 0.000733 | 0.000227 | 0.000163 | 0.000204 |
| min | 0.000376 | 0.001147 | 0.005583 | 0.005086 | 0.002921 | 0.001554 |
| max | 0.006091 | 0.004017 | 0.01135 | 0.006825 | 0.004169 | 0.003183 |
| 0.025 | 0.000847 | 0.001577 | 0.006455 | 0.005511 | 0.003127 | 0.002001 |
| 0.975 | 0.003565 | 0.003016 | 0.009338 | 0.006406 | 0.003765 | 0.002807 |
| 2.5%HPD | 0.000638 | 0.001551 | 0.006387 | 0.005503 | 0.003122 | 0.002019 |
| 97.5%HPD | 0.003294 | 0.002978 | 0.009263 | 0.006395 | 0.003759 | 0.002819 |
