# Supplementary material for: In silico phylogenomics using complete genomes: a case study on the evolution of hominoids
Source: HighWire-hosted journal article supplement (doi:10.1101/gr.203950.115), 2016-07-19
Supplement: Supplemental_Table_S11.docx [file Supplemental_Table_S11.docx]

**Table S11.** Posterior probabilities and associated statistics for parameters estimated from our AE 171 dataset converted into demographic and time units.We converted the original parameter estimates from Table S8 into demographic and absolute time units. See Table S5 for descriptions of prior combos (P1-P5), parameters, and details about parameter conversions. Speciation times are in units of millions of years ago.

| **171 loci-P1 run1** | *N*HC | *N*HCG | *N*HCGO | HCG-O | HC-G | HC |
| --- | --- | --- | --- | --- | --- | --- |
| mean | 14,078 | 25,932 | 113,783 | 6.1 | 3.4 | 2.6 |
| median | 13,726 | 25,649 | 113,355 | 6.1 | 3.4 | 2.6 |
| S.D. | 9,297 |  |  |  |  |  |
| min |  |  |  |  |  |  |
| max |  |  |  |  |  |  |
| 0.025 | 5,951 | 18,526 | 95,000 | 5.6 | 3.1 | 2.2 |
| 0.975 | 24,297 | 34,422 | 135,362 | 6.5 | 3.8 | 2.9 |
| 2.5%HPD | 4,829 | 17,995 | 94,441 | 5.6 | 3.1 | 2.2 |
| 97.5%HPD | 22,414 | 33,585 | 134,457 | 6.5 | 3.7 | 2.9 |
|  |  |  |  |  |  |  |
|  |  |  |  |  |  |  |
|  |  |  |  |  |  |  |
| **171 loci-P1 run2** | *N*HC | *N*HCG | *N*HCGO | HCG-O | HC-G | HC |
| mean | 13,945 | 26,026 | 114,293 | 6.1 | 3.4 | 2.6 |
| median | 13,479 | 25,802 | 113,931 | 6.1 | 3.4 | 2.6 |
| S.D. | 9,087 |  |  |  |  |  |
| min |  |  |  |  |  |  |
| max |  |  |  |  |  |  |
| 0.025 | 6,483 | 18,644 | 94,819 | 5.6 | 3.1 | 2.2 |
| 0.975 | 24,059 | 34,517 | 135,674 | 6.5 | 3.8 | 2.9 |
| 2.5%HPD | 5,817 | 18,184 | 93,914 | 5.6 | 3.1 | 2.2 |
| 97.5%HPD | 22,709 | 33,856 | 134,507 | 6.5 | 3.8 | 2.9 |
|  |  |  |  |  |  |  |
|  |  |  |  |  |  |  |
|  |  |  |  |  |  |  |
| **171 loci-P2 run1** | *N*HC | *N*HCG | *N*HCGO | HCG-O | HC-G | HC |
| mean | 13,945 | 25,849 | 113,832 | 6.1 | 3.4 | 2.6 |
| median | 13,489 | 25,672 | 113,454 | 6.1 | 3.4 | 2.6 |
| S.D. | 9,183 |  |  |  |  |  |
| min |  |  |  |  |  |  |
| max |  |  |  |  |  |  |
| 0.025 | 6,540 | 18,491 | 94,589 | 5.6 | 3.1 | 2.2 |
| 0.975 | 24,144 | 34,186 | 135,247 | 6.5 | 3.8 | 2.9 |
| 2.5%HPD | 6,008 | 17,972 | 94,112 | 5.6 | 3.1 | 2.2 |
| 97.5%HPD | 23,165 | 33,561 | 134,704 | 6.5 | 3.8 | 2.9 |
|  |  |  |  |  |  |  |
|  |  |  |  |  |  |  |
|  |  |  |  |  |  |  |
| **171 loci-P2 run2** | *N*HC | *N*HCG | *N*HCGO | HCG-O | HC-G | HC |
| mean | 14,163 | 25,955 | 113,832 | 6.1 | 3.4 | 2.6 |
| median | 13,793 | 25,684 | 113,339 | 6.1 | 3.4 | 2.6 |
| S.D. | 9,487 |  |  |  |  |  |
| min |  |  |  |  |  |  |
| max |  |  |  |  |  |  |
| 0.025 | 6,160 | 18,597 | 94,539 | 5.6 | 3.1 | 2.2 |
| 0.975 | 24,382 | 34,646 | 135,609 | 6.6 | 3.8 | 2.9 |
| 2.5%HPD | 5,722 | 17,936 | 94,523 | 5.6 | 3.1 | 2.2 |
| 97.5%HPD | 23,375 | 33,833 | 135,543 | 6.5 | 3.8 | 2.9 |
|  |  |  |  |  |  |  |
|  |  |  |  |  |  |  |
|  |  |  |  |  |  |  |
| **171 loci-P3 run1** | *N*HC | *N*HCG | *N*HCGO | HCG-O | HC-G | HC |
| mean | 17,757 | 26,285 | 124,638 | 6.0 | 3.4 | 2.5 |
| median | 17,101 | 26,050 | 124,013 | 6.0 | 3.4 | 2.5 |
| S.D. | 12,338 |  |  |  |  |  |
| min |  |  |  |  |  |  |
| max |  |  |  |  |  |  |
| 0.025 | 5,960 | 18,750 | 103,125 | 5.5 | 3.1 | 2.0 |
| 0.975 | 31,492 | 35,377 | 149,474 | 6.4 | 3.8 | 2.9 |
| 2.5%HPD | 4,762 | 18,314 | 102,780 | 5.5 | 3.1 | 2.0 |
| 97.5%HPD | 28,973 | 34,823 | 148,997 | 6.4 | 3.8 | 2.8 |
|  |  |  |  |  |  |  |
|  |  |  |  |  |  |  |
|  |  |  |  |  |  |  |
| **171 loci-P3 run2** | *N*HC | *N*HCG | *N*HCGO | HCG-O | HC-G | HC |
| mean | 17,215 | 26,498 | 125,115 | 6.0 | 3.4 | 2.5 |
| median | 16,663 | 26,120 | 124,507 | 6.0 | 3.4 | 2.5 |
| S.D. | 12,015 |  |  |  |  |  |
| min |  |  |  |  |  |  |
| max |  |  |  |  |  |  |
| 0.025 | 6,454 | 19,021 | 103,503 | 5.5 | 3.1 | 2.1 |
| 0.975 | 30,599 | 35,590 | 149,984 | 6.4 | 3.8 | 2.8 |
| 2.5%HPD | 4,696 | 18,479 | 103,306 | 5.5 | 3.1 | 2.1 |
| 97.5%HPD | 27,956 | 34,823 | 149,655 | 6.4 | 3.7 | 2.9 |
|  |  |  |  |  |  |  |
|  |  |  |  |  |  |  |
|  |  |  |  |  |  |  |
| **171 loci-P4 run1** | *N*HC | *N*HCG | *N*HCGO | HCG-O | HC-G | HC |
| mean | 17,272 | 26,262 | 124,868 | 6.0 | 3.4 | 2.5 |
| median | 16,673 | 26,026 | 124,211 | 6.0 | 3.4 | 2.5 |
| S.D. | 10,779 |  |  |  |  |  |
| min |  |  |  |  |  |  |
| max |  |  |  |  |  |  |
| 0.025 | 8,517 | 18,738 | 103,405 | 5.5 | 3.1 | 2.1 |
| 0.975 | 29,753 | 34,894 | 149,934 | 6.4 | 3.8 | 2.8 |
| 2.5%HPD | 7,234 | 18,373 | 101,431 | 5.6 | 3.1 | 2.1 |
| 97.5%HPD | 27,538 | 34,517 | 147,599 | 6.4 | 3.8 | 2.8 |
|  |  |  |  |  |  |  |
|  |  |  |  |  |  |  |
|  |  |  |  |  |  |  |
| **171 loci-P4 run2** | *N*HC | *N*HCG | *N*HCGO | HCG-O | HC-G | HC |
| mean | 17,462 | 26,368 | 125,263 | 6.0 | 3.4 | 2.5 |
| median | 16,673 | 26,167 | 124,753 | 6.0 | 3.4 | 2.5 |
| S.D. | 12,186 |  |  |  |  |  |
| min |  |  |  |  |  |  |
| max |  |  |  |  |  |  |
| 0.025 | 7,490 | 18,998 | 103,602 | 5.5 | 3.1 | 2.1 |
| 0.975 | 31,616 | 34,976 | 150,543 | 6.4 | 3.7 | 2.8 |
| 2.5%HPD | 6,816 | 18,962 | 102,615 | 5.5 | 3.1 | 2.1 |
| 97.5%HPD | 29,648 | 34,894 | 149,112 | 6.4 | 3.7 | 2.9 |
|  |  |  |  |  |  |  |
|  |  |  |  |  |  |  |
|  |  |  |  |  |  |  |
| **171 loci-P5 run1** | *N*HC | *N*HCG | *N*HCGO | HCG-O | HC-G | HC |
| mean | 18,279 | 26,639 | 127,993 | 6.0 | 3.4 | 2.4 |
| median | 17,395 | 26,380 | 127,434 | 6.0 | 3.4 | 2.5 |
| S.D. | 12,757 |  |  |  |  |  |
| min |  |  |  |  |  |  |
| max |  |  |  |  |  |  |
| 0.025 | 8,289 | 18,821 | 105,707 | 5.5 | 3.1 | 2.0 |
| 0.975 | 32,985 | 35,672 | 153,076 | 6.4 | 3.8 | 2.8 |
| 2.5%HPD | 7,044 | 18,691 | 105,115 | 5.5 | 3.1 | 2.0 |
| 97.5%HPD | 30,304 | 35,507 | 152,056 | 6.4 | 3.8 | 2.8 |
|  |  |  |  |  |  |  |
|  |  |  |  |  |  |  |
|  |  |  |  |  |  |  |
| **171 loci-P5 run2** | *N*HC | *N*HCG | *N*HCGO | HCG-O | HC-G | HC |
| mean | 18,859 | 26,509 | 128,405 | 6.0 | 3.4 | 2.4 |
| median | 18,051 | 26,285 | 127,895 | 5.9 | 3.4 | 2.4 |
| S.D. | 13,156 |  |  |  |  |  |
| min |  |  |  |  |  |  |
| max |  |  |  |  |  |  |
| 0.025 | 8,051 | 18,597 | 106,168 | 5.5 | 3.1 | 2.0 |
| 0.975 | 33,888 | 35,566 | 153,586 | 6.4 | 3.8 | 2.8 |
| 2.5%HPD | 6,065 | 18,290 | 105,049 | 5.5 | 3.1 | 2.0 |
| 97.5%HPD | 31,312 | 35,118 | 152,352 | 6.4 | 3.8 | 2.8 |
