# Supplementary material for: In silico phylogenomics using complete genomes: a case study on the evolution of hominoids
Source: HighWire-hosted journal article supplement (doi:10.1101/gr.203950.115), 2016-07-19
Supplement: Supplemental_Table_S12.docx [file Supplemental_Table_S12.docx]

**Table S12.** Posterior probabilities and associated statistics for parameters estimated from our AE 242 dataset. We used the program BPP2.2 (Yang 2001) to estimate three ancestral population size (**) and three speciation (**) parameters from genomic data for the hominoids. See Table S5 for descriptions of prior combos (P1-P5) and parameters. We repeated each analysis once (runs 1 and 2) to check for convergence.

| **242 loci-P1 run1** | HC | HCG | HCGO | HCG-O | HC-G | HC |
| --- | --- | --- | --- | --- | --- | --- |
| mean | 0.001552 | 0.002086 | 0.008082 | 0.004838 | 0.002983 | 0.002228 |
| median | 0.00151 | 0.002079 | 0.008061 | 0.004834 | 0.002982 | 0.002232 |
| S.D. | 0.000442 | 0.000264 | 0.000591 | 0.000167 | 0.000119 | 0.000138 |
| min | 0.000544 | 0.001298 | 0.006173 | 0.004263 | 0.002535 | 0.001696 |
| max | 0.003894 | 0.003266 | 0.010821 | 0.005502 | 0.003459 | 0.002669 |
| 0.025 | 0.000764 | 0.001592 | 0.00699 | 0.004518 | 0.002754 | 0.001942 |
| 0.975 | 0.002517 | 0.002615 | 0.009289 | 0.005172 | 0.003217 | 0.00249 |
| 2.5%HPD | 0.000734 | 0.001576 | 0.006958 | 0.004515 | 0.002752 | 0.001961 |
| 97.5%HPD | 0.002458 | 0.002596 | 0.009245 | 0.005168 | 0.003214 | 0.002505 |
|  |  |  |  |  |  |  |
|  |  |  |  |  |  |  |
|  |  |  |  |  |  |  |
| **242 loci-P1 run2** | HC | HCG | HCGO | HCG-O | HC-G | HC |
| mean | 0.001562 | 0.002061 | 0.008089 | 0.004832 | 0.002994 | 0.002227 |
| median | 0.001524 | 0.002053 | 0.008066 | 0.004833 | 0.002994 | 0.00223 |
| S.D. | 0.000445 | 0.000272 | 0.000586 | 0.000169 | 0.00012 | 0.000136 |
| min | 0.000524 | 0.001289 | 0.006038 | 0.004219 | 0.002558 | 0.001629 |
| max | 0.003892 | 0.003237 | 0.010458 | 0.005419 | 0.003522 | 0.002707 |
| 0.025 | 0.000786 | 0.001551 | 0.007 | 0.004501 | 0.00276 | 0.00195 |
| 0.975 | 0.002535 | 0.002615 | 0.009294 | 0.005161 | 0.003233 | 0.002485 |
| 2.5%HPD | 0.000741 | 0.001532 | 0.006991 | 0.004503 | 0.002765 | 0.001955 |
| 97.5%HPD | 0.002445 | 0.002593 | 0.009274 | 0.005161 | 0.003237 | 0.002489 |
|  |  |  |  |  |  |  |
|  |  |  |  |  |  |  |
|  |  |  |  |  |  |  |
| **242 loci-P2 run1** | HC | HCG | HCGO | HCG-O | HC-G | HC |
| mean | 0.001517 | 0.002086 | 0.008051 | 0.004842 | 0.002986 | 0.002242 |
| median | 0.001472 | 0.002078 | 0.008033 | 0.004842 | 0.002984 | 0.002246 |
| S.D. | 0.000469 | 0.000265 | 0.000573 | 0.000167 | 0.000118 | 0.000145 |
| min | 0.000466 | 0.001215 | 0.006194 | 0.004169 | 0.002539 | 0.001659 |
| max | 0.003878 | 0.003255 | 0.010548 | 0.005468 | 0.003462 | 0.002718 |
| 0.025 | 0.00072 | 0.001603 | 0.00698 | 0.004521 | 0.002762 | 0.001944 |
| 0.975 | 0.002587 | 0.002644 | 0.00922 | 0.005171 | 0.003219 | 0.002518 |
| 2.5%HPD | 0.000618 | 0.001592 | 0.007026 | 0.004512 | 0.002759 | 0.001965 |
| 97.5%HPD | 0.002401 | 0.002626 | 0.009262 | 0.005159 | 0.003214 | 0.002535 |
|  |  |  |  |  |  |  |
|  |  |  |  |  |  |  |
|  |  |  |  |  |  |  |
| **242 loci-P2 run2** | HC | HCG | HCGO | HCG-O | HC-G | HC |
| mean | 0.001572 | 0.002059 | 0.008106 | 0.004828 | 0.002997 | 0.002227 |
| median | 0.001534 | 0.002046 | 0.008078 | 0.004826 | 0.002996 | 0.00223 |
| S.D. | 0.000456 | 0.000268 | 0.000599 | 0.000173 | 0.000116 | 0.000142 |
| min | 0.000563 | 0.001096 | 0.006108 | 0.004207 | 0.002566 | 0.001561 |
| max | 0.003768 | 0.003216 | 0.010537 | 0.00542 | 0.00343 | 0.002743 |
| 0.025 | 0.000787 | 0.001579 | 0.007017 | 0.004494 | 0.002771 | 0.001935 |
| 0.975 | 0.002569 | 0.002606 | 0.009337 | 0.005165 | 0.003224 | 0.002493 |
| 2.5%HPD | 0.000713 | 0.001581 | 0.007 | 0.004487 | 0.002769 | 0.001948 |
| 97.5%HPD | 0.002453 | 0.002606 | 0.009313 | 0.005155 | 0.00322 | 0.002502 |
|  |  |  |  |  |  |  |
|  |  |  |  |  |  |  |
|  |  |  |  |  |  |  |
| **242 loci-P3 run1** | HC | HCG | HCGO | HCG-O | HC-G | HC |
| mean | 0.001873 | 0.002062 | 0.008628 | 0.004787 | 0.002994 | 0.002143 |
| median | 0.001817 | 0.002045 | 0.008603 | 0.004786 | 0.002994 | 0.002149 |
| S.D. | 0.000551 | 0.000273 | 0.000656 | 0.000168 | 0.000119 | 0.000149 |
| min | 0.000548 | 0.001261 | 0.00623 | 0.004136 | 0.002517 | 0.001528 |
| max | 0.004774 | 0.003372 | 0.011459 | 0.00544 | 0.003425 | 0.002623 |
| 0.025 | 0.000961 | 0.001556 | 0.007405 | 0.004456 | 0.002758 | 0.001838 |
| 0.975 | 0.003093 | 0.002635 | 0.010012 | 0.005115 | 0.003227 | 0.002416 |
| 2.5%HPD | 0.000847 | 0.001527 | 0.007343 | 0.004456 | 0.002753 | 0.001848 |
| 97.5%HPD | 0.002942 | 0.002602 | 0.009932 | 0.005114 | 0.003221 | 0.002424 |
|  |  |  |  |  |  |  |
|  |  |  |  |  |  |  |
|  |  |  |  |  |  |  |
| **242 loci-P3 run2** | HC | HCG | HCGO | HCG-O | HC-G | HC |
| mean | 0.00193 | 0.002049 | 0.00863 | 0.004786 | 0.002998 | 0.002129 |
| median | 0.001876 | 0.002035 | 0.008612 | 0.004784 | 0.002996 | 0.002133 |
| S.D. | 0.000588 | 0.000272 | 0.000644 | 0.000169 | 0.000117 | 0.000158 |
| min | 0.000592 | 0.001255 | 0.006469 | 0.004145 | 0.002567 | 0.001485 |
| max | 0.005468 | 0.003681 | 0.01127 | 0.005415 | 0.003458 | 0.002679 |
| 0.025 | 0.000945 | 0.001543 | 0.007427 | 0.004463 | 0.002772 | 0.001806 |
| 0.975 | 0.003271 | 0.002609 | 0.009951 | 0.005125 | 0.003233 | 0.002423 |
| 2.5%HPD | 0.000836 | 0.001513 | 0.007398 | 0.004455 | 0.002776 | 0.001824 |
| 97.5%HPD | 0.003058 | 0.00257 | 0.009915 | 0.005114 | 0.003235 | 0.002436 |
|  |  |  |  |  |  |  |
|  |  |  |  |  |  |  |
|  |  |  |  |  |  |  |
| **242 loci-P4 run1** | HC | HCG | HCGO | HCG-O | HC-G | HC |
| mean | 0.001874 | 0.002058 | 0.00862 | 0.004794 | 0.002997 | 0.002145 |
| median | 0.001819 | 0.002046 | 0.008597 | 0.004795 | 0.002995 | 0.002151 |
| S.D. | 0.00056 | 0.000273 | 0.00066 | 0.000173 | 0.000117 | 0.000154 |
| min | 0.000638 | 0.001289 | 0.006513 | 0.004147 | 0.002473 | 0.00154 |
| max | 0.004857 | 0.003253 | 0.01164 | 0.005506 | 0.003421 | 0.002724 |
| 0.025 | 0.000956 | 0.001547 | 0.007396 | 0.004459 | 0.00277 | 0.001828 |
| 0.975 | 0.003158 | 0.002621 | 0.009979 | 0.005134 | 0.003227 | 0.002427 |
| 2.5%HPD | 0.000872 | 0.001512 | 0.007345 | 0.004447 | 0.002765 | 0.001841 |
| 97.5%HPD | 0.003015 | 0.002571 | 0.009916 | 0.005121 | 0.003221 | 0.002438 |
|  |  |  |  |  |  |  |
|  |  |  |  |  |  |  |
|  |  |  |  |  |  |  |
| **242 loci-P4 run2** | HC | HCG | HCGO | HCG-O | HC-G | HC |
| mean | 0.001903 | 0.002057 | 0.0086 | 0.004794 | 0.003 | 0.002139 |
| median | 0.001851 | 0.002046 | 0.008589 | 0.00479 | 0.003 | 0.002141 |
| S.D. | 0.00056 | 0.00027 | 0.000642 | 0.00017 | 0.000116 | 0.000152 |
| min | 0.000565 | 0.001231 | 0.006405 | 0.004153 | 0.002568 | 0.001547 |
| max | 0.005183 | 0.003431 | 0.011282 | 0.005389 | 0.003505 | 0.002621 |
| 0.025 | 0.000934 | 0.001558 | 0.007386 | 0.004465 | 0.002775 | 0.001833 |
| 0.975 | 0.003146 | 0.002615 | 0.00992 | 0.00513 | 0.00323 | 0.002431 |
| 2.5%HPD | 0.000795 | 0.001547 | 0.007373 | 0.004457 | 0.002774 | 0.00184 |
| 97.5%HPD | 0.002952 | 0.002599 | 0.009895 | 0.005121 | 0.003228 | 0.002436 |
|  |  |  |  |  |  |  |
|  |  |  |  |  |  |  |
|  |  |  |  |  |  |  |
| **242 loci-P5 run1** | HC | HCG | HCGO | HCG-O | HC-G | HC |
| mean | 0.002046 | 0.002051 | 0.008776 | 0.004778 | 0.002999 | 0.002103 |
| median | 0.001977 | 0.002039 | 0.008753 | 0.004778 | 0.002998 | 0.002107 |
| S.D. | 0.000635 | 0.000265 | 0.000666 | 0.000169 | 0.000112 | 0.000162 |
| min | 0.000733 | 0.001265 | 0.006577 | 0.004148 | 0.002547 | 0.001414 |
| max | 0.006124 | 0.003283 | 0.011914 | 0.005484 | 0.003477 | 0.002627 |
| 0.025 | 0.000976 | 0.001573 | 0.00754 | 0.00445 | 0.002781 | 0.001765 |
| 0.975 | 0.003512 | 0.002609 | 0.01014 | 0.005106 | 0.003224 | 0.002406 |
| 2.5%HPD | 0.000906 | 0.001553 | 0.007479 | 0.004454 | 0.002782 | 0.001786 |
| 97.5%HPD | 0.003317 | 0.002583 | 0.010076 | 0.005107 | 0.003224 | 0.002423 |
|  |  |  |  |  |  |  |
|  |  |  |  |  |  |  |
|  |  |  |  |  |  |  |
| **242 loci-P5 run2** | HC | HCG | HCGO | HCG-O | HC-G | HC |
| mean | 0.002013 | 0.002048 | 0.00879 | 0.004773 | 0.002996 | 0.00211 |
| median | 0.001959 | 0.00204 | 0.008759 | 0.004773 | 0.002996 | 0.002113 |
| S.D. | 0.00063 | 0.000271 | 0.00067 | 0.000169 | 0.000115 | 0.000162 |
| min | 0.000683 | 0.001221 | 0.006689 | 0.004123 | 0.002566 | 0.001282 |
| max | 0.006706 | 0.003218 | 0.011847 | 0.00546 | 0.003479 | 0.002637 |
| 0.025 | 0.000978 | 0.001534 | 0.00756 | 0.004442 | 0.002777 | 0.001787 |
| 0.975 | 0.003387 | 0.002593 | 0.010202 | 0.005106 | 0.003226 | 0.002418 |
| 2.5%HPD | 0.000857 | 0.001529 | 0.007507 | 0.004418 | 0.002775 | 0.001794 |
| 97.5%HPD | 0.003191 | 0.002577 | 0.010121 | 0.005078 | 0.003224 | 0.002423 |
