# Supplementary material for: In silico phylogenomics using complete genomes: a case study on the evolution of hominoids
Source: HighWire-hosted journal article supplement (doi:10.1101/gr.203950.115), 2016-07-19
Supplement: Supplemental_Table_S14.docx [file Supplemental_Table_S14.docx]

**Table S14**. Posterior probabilities and associated statistics for parameters estimated from the 208 AL loci that fit an HKY model.We used the program BPP2.2 (Yang 2012) to estimate three ancestral population size (**) and three speciation (**) parameters from genomic data for the hominoids. See Table S5 for descriptions of prior combos (P1-P5) and parameters. We repeated each analysis once (runs 1 and 2) to check for convergence.

| **208 loci-P1 run1** | HC | HCG | HCGO | HCG-O | HC-G | HC |
| --- | --- | --- | --- | --- | --- | --- |
| mean | 0.004086 | 0.003489 | 0.005249 | 0.012699 | 0.00595 | 0.004205 |
| median | 0.004027 | 0.003472 | 0.005223 | 0.0127 | 0.005951 | 0.004211 |
| S.D. | 0.000954 | 0.000367 | 0.000581 | 0.000286 | 0.000176 | 0.000257 |
| min | 0.001234 | 0.002195 | 0.003322 | 0.011504 | 0.005202 | 0.003138 |
| max | 0.008773 | 0.00504 | 0.008019 | 0.013831 | 0.006658 | 0.005177 |
| 2.50% | 0.002439 | 0.002823 | 0.004173 | 0.012141 | 0.005608 | 0.003692 |
| 97.50% | 0.006101 | 0.004251 | 0.006475 | 0.013263 | 0.006291 | 0.004695 |
| 2.5%HPD | 0.002365 | 0.002793 | 0.00413 | 0.012146 | 0.005604 | 0.003693 |
| 97.5%HPD | 0.006003 | 0.004213 | 0.006413 | 0.013264 | 0.006286 | 0.004696 |
|  |  |  |  |  |  |  |
|  |  |  |  |  |  |  |
|  |  |  |  |  |  |  |
| **208 loci-P1 run2** | HC | HCG | HCGO | HCG-O | HC-G | HC |
| mean | 0.004075 | 0.003487 | 0.005233 | 0.012714 | 0.005949 | 0.004209 |
| median | 0.003999 | 0.003473 | 0.005207 | 0.012715 | 0.005948 | 0.004212 |
| S.D. | 0.000968 | 0.000366 | 0.000585 | 0.000285 | 0.000176 | 0.000259 |
| min | 0.001461 | 0.002262 | 0.003109 | 0.011573 | 0.005358 | 0.003176 |
| max | 0.009007 | 0.00511 | 0.007949 | 0.013764 | 0.006719 | 0.005112 |
| 0.025 | 0.002371 | 0.002808 | 0.004147 | 0.012149 | 0.005601 | 0.003692 |
| 0.975 | 0.00616 | 0.004246 | 0.006428 | 0.013272 | 0.006289 | 0.004705 |
| 2.5%HPD | 0.00223 | 0.002771 | 0.004152 | 0.012176 | 0.005603 | 0.003704 |
| 97.5%HPD | 0.005959 | 0.004195 | 0.006429 | 0.013293 | 0.00629 | 0.004715 |
|  |  |  |  |  |  |  |
|  |  |  |  |  |  |  |
|  |  |  |  |  |  |  |
| **208 loci-P2 run1** | HC | HCG | HCGO | HCG-O | HC-G | HC |
| mean | 0.004099 | 0.003477 | 0.005249 | 0.012703 | 0.005958 | 0.004206 |
| median | 0.004042 | 0.00346 | 0.00523 | 0.012703 | 0.005958 | 0.00421 |
| S.D. | 0.000979 | 0.000362 | 0.000583 | 0.00029 | 0.000175 | 0.000264 |
| min | 0.001341 | 0.002301 | 0.003083 | 0.011563 | 0.005184 | 0.003185 |
| max | 0.009515 | 0.005169 | 0.007796 | 0.013983 | 0.006642 | 0.005138 |
| 0.025 | 0.002352 | 0.00282 | 0.004142 | 0.012135 | 0.005612 | 0.003672 |
| 0.975 | 0.006185 | 0.00424 | 0.006441 | 0.013268 | 0.006296 | 0.004719 |
| 2.5%HPD | 0.002262 | 0.002804 | 0.004081 | 0.012135 | 0.005615 | 0.003679 |
| 97.5%HPD | 0.006036 | 0.004214 | 0.006359 | 0.013266 | 0.006297 | 0.004723 |
|  |  |  |  |  |  |  |
|  |  |  |  |  |  |  |
|  |  |  |  |  |  |  |
| **208 loci-P2 run2** | HC | HCG | HCGO | HCG-O | HC-G | HC |
| mean | 0.004115 | 0.003483 | 0.005214 | 0.012722 | 0.005955 | 0.004203 |
| median | 0.004074 | 0.003469 | 0.005191 | 0.012725 | 0.005955 | 0.004203 |
| S.D. | 0.001008 | 0.00037 | 0.000574 | 0.000291 | 0.000175 | 0.000271 |
| min | 0.001234 | 0.002195 | 0.003338 | 0.011613 | 0.005317 | 0.003135 |
| max | 0.008461 | 0.005196 | 0.007929 | 0.013837 | 0.006758 | 0.005191 |
| 0.025 | 0.002292 | 0.002809 | 0.004148 | 0.012144 | 0.005606 | 0.003672 |
| 0.975 | 0.006218 | 0.004248 | 0.006385 | 0.013292 | 0.006297 | 0.004723 |
| 2.5%HPD | 0.002156 | 0.002778 | 0.004142 | 0.012138 | 0.005625 | 0.003667 |
| 97.5%HPD | 0.006056 | 0.004213 | 0.006369 | 0.013281 | 0.006312 | 0.004717 |
|  |  |  |  |  |  |  |
|  |  |  |  |  |  |  |
|  |  |  |  |  |  |  |
| **208 loci-P3 run1** | HC | HCG | HCGO | HCG-O | HC-G | HC |
| mean | 0.005978 | 0.003504 | 0.005829 | 0.012539 | 0.005981 | 0.003843 |
| median | 0.00587 | 0.003486 | 0.005798 | 0.012544 | 0.00598 | 0.003846 |
| S.D. | 0.001423 | 0.000372 | 0.000657 | 0.000297 | 0.000173 | 0.000287 |
| min | 0.002188 | 0.002195 | 0.003474 | 0.011214 | 0.005291 | 0.002827 |
| max | 0.013081 | 0.005141 | 0.009078 | 0.013823 | 0.006649 | 0.004929 |
| 0.025 | 0.003517 | 0.002811 | 0.004625 | 0.011946 | 0.005642 | 0.003279 |
| 0.975 | 0.009071 | 0.00428 | 0.007209 | 0.013116 | 0.006317 | 0.004393 |
| 2.5%HPD | 0.003301 | 0.002764 | 0.004569 | 0.011941 | 0.005637 | 0.003301 |
| 97.5%HPD | 0.008762 | 0.004228 | 0.007143 | 0.013107 | 0.006311 | 0.004415 |
|  |  |  |  |  |  |  |
|  |  |  |  |  |  |  |
|  |  |  |  |  |  |  |
| **208 loci-P3 run2** | HC | HCG | HCGO | HCG-O | HC-G | HC |
| mean | 0.005916 | 0.003497 | 0.005825 | 0.01254 | 0.005983 | 0.003853 |
| median | 0.005796 | 0.003474 | 0.005791 | 0.012544 | 0.00598 | 0.003858 |
| S.D. | 0.001391 | 0.000373 | 0.000664 | 0.000297 | 0.000173 | 0.000286 |
| min | 0.001765 | 0.002286 | 0.003543 | 0.011422 | 0.005281 | 0.002438 |
| max | 0.014216 | 0.005341 | 0.008757 | 0.013672 | 0.006656 | 0.005006 |
| 0.025 | 0.003472 | 0.002811 | 0.004603 | 0.011937 | 0.005644 | 0.003281 |
| 0.975 | 0.008975 | 0.004282 | 0.007225 | 0.013111 | 0.00632 | 0.004405 |
| 2.5%HPD | 0.003268 | 0.00281 | 0.004548 | 0.011971 | 0.005636 | 0.003301 |
| 97.5%HPD | 0.008662 | 0.004278 | 0.007149 | 0.013144 | 0.00631 | 0.004415 |
|  |  |  |  |  |  |  |
|  |  |  |  |  |  |  |
|  |  |  |  |  |  |  |
| **208 loci-P4 run1** | HC | HCG | HCGO | HCG-O | HC-G | HC |
| mean | 0.005876 | 0.003507 | 0.005786 | 0.012562 | 0.005979 | 0.00386 |
| median | 0.00575 | 0.003488 | 0.005758 | 0.012565 | 0.00598 | 0.003863 |
| S.D. | 0.001406 | 0.000365 | 0.000647 | 0.000289 | 0.00017 | 0.000286 |
| min | 0.002101 | 0.002419 | 0.003357 | 0.011394 | 0.005293 | 0.002634 |
| max | 0.012771 | 0.005259 | 0.008813 | 0.013689 | 0.00669 | 0.004923 |
| 0.025 | 0.003447 | 0.002844 | 0.004602 | 0.011995 | 0.005644 | 0.003288 |
| 0.975 | 0.00903 | 0.004288 | 0.007141 | 0.013124 | 0.006311 | 0.004407 |
| 2.5%HPD | 0.003211 | 0.002776 | 0.004584 | 0.011997 | 0.005644 | 0.003277 |
| 97.5%HPD | 0.008633 | 0.004212 | 0.007116 | 0.013124 | 0.00631 | 0.004395 |
|  |  |  |  |  |  |  |
|  |  |  |  |  |  |  |
|  |  |  |  |  |  |  |
| **208 loci-P4 run2** | HC | HCG | HCGO | HCG-O | HC-G | HC |
| mean | 0.005905 | 0.003508 | 0.005819 | 0.012551 | 0.00598 | 0.003854 |
| median | 0.005773 | 0.003486 | 0.005781 | 0.012554 | 0.00598 | 0.003859 |
| S.D. | 0.0014 | 0.00037 | 0.000654 | 0.000293 | 0.00017 | 0.000286 |
| min | 0.002134 | 0.002254 | 0.003681 | 0.011362 | 0.005278 | 0.002637 |
| max | 0.01263 | 0.005248 | 0.009352 | 0.013762 | 0.006669 | 0.004812 |
| 0.025 | 0.003512 | 0.002843 | 0.004622 | 0.011969 | 0.005648 | 0.003278 |
| 0.975 | 0.008984 | 0.004299 | 0.007222 | 0.013114 | 0.006312 | 0.004396 |
| 2.5%HPD | 0.003313 | 0.00282 | 0.004478 | 0.011964 | 0.005648 | 0.00328 |
| 97.5%HPD | 0.008702 | 0.00426 | 0.007043 | 0.013106 | 0.006312 | 0.004396 |
|  |  |  |  |  |  |  |
|  |  |  |  |  |  |  |
|  |  |  |  |  |  |  |
| **208 loci-P5 run1** | HC | HCG | HCGO | HCG-O | HC-G | HC |
| mean | 0.006902 | 0.003509 | 0.006009 | 0.01249 | 0.005982 | 0.003698 |
| median | 0.006724 | 0.003486 | 0.005973 | 0.012492 | 0.005982 | 0.0037 |
| S.D. | 0.001699 | 0.000363 | 0.000682 | 0.000296 | 0.00017 | 0.000296 |
| min | 0.002524 | 0.002159 | 0.003706 | 0.011367 | 0.005221 | 0.00258 |
| max | 0.018857 | 0.005278 | 0.009162 | 0.013679 | 0.006616 | 0.004658 |
| 0.025 | 0.004039 | 0.002861 | 0.004763 | 0.011911 | 0.005646 | 0.003104 |
| 0.975 | 0.010612 | 0.004259 | 0.00741 | 0.013055 | 0.006314 | 0.004259 |
| 2.5%HPD | 0.003861 | 0.002838 | 0.004746 | 0.011916 | 0.005654 | 0.003128 |
| 97.5%HPD | 0.010336 | 0.004229 | 0.007384 | 0.013057 | 0.00632 | 0.004279 |
|  |  |  |  |  |  |  |
|  |  |  |  |  |  |  |
|  |  |  |  |  |  |  |
| **208 loci-P5 run2** | HC | HCG | HCGO | HCG-O | HC-G | HC |
| mean | 0.006842 | 0.003513 | 0.006032 | 0.012482 | 0.005982 | 0.003708 |
| median | 0.00666 | 0.0035 | 0.005993 | 0.012483 | 0.005983 | 0.003716 |
| S.D. | 0.001701 | 0.000366 | 0.00068 | 0.000295 | 0.000171 | 0.000301 |
| min | 0.002459 | 0.002385 | 0.003809 | 0.011356 | 0.005344 | 0.002285 |
| max | 0.01681 | 0.005237 | 0.00883 | 0.013645 | 0.006722 | 0.004716 |
| 0.025 | 0.004059 | 0.002848 | 0.004808 | 0.011895 | 0.005647 | 0.003094 |
| 0.975 | 0.010672 | 0.004279 | 0.007443 | 0.013058 | 0.006316 | 0.004279 |
| 2.5%HPD | 0.003863 | 0.002843 | 0.00474 | 0.011915 | 0.00565 | 0.003135 |
| 97.5%HPD | 0.010332 | 0.004267 | 0.007361 | 0.013072 | 0.006317 | 0.004318 |
