# Supplementary material for: In silico phylogenomics using complete genomes: a case study on the evolution of hominoids
Source: HighWire-hosted journal article supplement (doi:10.1101/gr.203950.115), 2016-07-19
Supplement: Supplemental_Table_S15.docx [file Supplemental_Table_S15.docx]

**Table S15**. Posterior probabilities and associated statistics for parameters estimated from the 208 AL loci that fit an HKY model converted into demographic and time units. We converted the original parameter estimates from Table S6 into demographic and absolute time units. See Table S5 for descriptions of prior combos (P1-P5), parameters, and details about parameter conversions. Speciation times are in units of millions of years ago.

| **208 loci-P1 run1** | *N*HC | *N*HCG | *N*HCGO | HCG-O | HC-G | HC |
| --- | --- | --- | --- | --- | --- | --- |
| mean | 38840 | 41144 | 86332 | 12.7 | 6.0 | 4.2 |
| median | 38279 | 40943 | 85905 | 12.7 | 6.0 | 4.2 |
| S.D. | 18137 |  |  |  |  |  |
| min |  |  |  |  |  |  |
| max |  |  |  |  |  |  |
| 0.025 | 23184 | 33290 | 68635 | 12.1 | 5.6 | 3.7 |
| 0.975 | 57994 | 50130 | 106497 | 13.3 | 6.3 | 4.7 |
| 2.5%HPD | 22481 | 32936 | 67928 | 12.1 | 5.6 | 3.7 |
| 97.5%HPD | 57063 | 49682 | 105477 | 13.3 | 6.3 | 4.7 |
|  |  |  |  |  |  |  |
|  |  |  |  |  |  |  |
|  |  |  |  |  |  |  |
| **208 loci-P1 run2** | *N*HC | *N*HCG | *N*HCGO | HCG-O | HC-G | HC |
| mean | 38736 | 41120 | 86069 | 12.7 | 5.9 | 4.2 |
| median | 38013 | 40955 | 85641 | 12.7 | 5.9 | 4.2 |
| S.D. | 18403 |  |  |  |  |  |
| min |  |  |  |  |  |  |
| max |  |  |  |  |  |  |
| 0.025 | 22538 | 33113 | 68207 | 12.1 | 5.6 | 3.7 |
| 0.975 | 58555 | 50071 | 105724 | 13.3 | 6.3 | 4.7 |
| 2.5%HPD | 21198 | 32677 | 68289 | 12.2 | 5.6 | 3.7 |
| 97.5%HPD | 56644 | 49469 | 105740 | 13.3 | 6.3 | 4.7 |
|  |  |  |  |  |  |  |
|  |  |  |  |  |  |  |
|  |  |  |  |  |  |  |
| **208 loci-P2 run1** | *N*HC | *N*HCG | *N*HCGO | HCG-O | HC-G | HC |
| mean | 38964 | 41002 | 86332 | 12.7 | 6.0 | 4.2 |
| median | 38422 | 40802 | 86020 | 12.7 | 6.0 | 4.2 |
| S.D. | 18612 |  |  |  |  |  |
| min |  |  |  |  |  |  |
| max |  |  |  |  |  |  |
| 0.025 | 22357 | 33255 | 68125 | 12.1 | 5.6 | 3.7 |
| 0.975 | 58793 | 50000 | 105938 | 13.3 | 6.3 | 4.7 |
| 2.5%HPD | 21502 | 33066 | 67122 | 12.1 | 5.6 | 3.7 |
| 97.5%HPD | 57376 | 49693 | 104589 | 13.3 | 6.3 | 4.7 |
|  |  |  |  |  |  |  |
|  |  |  |  |  |  |  |
|  |  |  |  |  |  |  |
| **208 loci-P2 run2** | *N*HC | *N*HCG | *N*HCGO | HCG-O | HC-G | HC |
| mean | 39116 | 41073 | 85757 | 12.7 | 6.0 | 4.2 |
| median | 38726 | 40908 | 85378 | 12.7 | 6.0 | 4.2 |
| S.D. | 19163 |  |  |  |  |  |
| min |  |  |  |  |  |  |
| max |  |  |  |  |  |  |
| 0.025 | 21787 | 33125 | 68224 | 12.1 | 5.6 | 3.7 |
| 0.975 | 59106 | 50094 | 105016 | 13.3 | 6.3 | 4.7 |
| 2.5%HPD | 20494 | 32759 | 68125 | 12.1 | 5.6 | 3.7 |
| 97.5%HPD | 57567 | 49682 | 104753 | 13.3 | 6.3 | 4.7 |
|  |  |  |  |  |  |  |
|  |  |  |  |  |  |  |
|  |  |  |  |  |  |  |
| **208 loci-P3 run1** | *N*HC | *N*HCG | *N*HCGO | HCG-O | HC-G | HC |
| mean | 56825 | 41321 | 95872 | 12.5 | 6.0 | 3.8 |
| median | 55798 | 41108 | 95362 | 12.5 | 6.0 | 3.8 |
| S.D. | 27053 |  |  |  |  |  |
| min |  |  |  |  |  |  |
| max |  |  |  |  |  |  |
| 0.025 | 33432 | 33149 | 76069 | 11.9 | 5.6 | 3.3 |
| 0.975 | 86226 | 50472 | 118569 | 13.1 | 6.3 | 4.4 |
| 2.5%HPD | 31378 | 32594 | 75148 | 11.9 | 5.6 | 3.3 |
| 97.5%HPD | 83289 | 49858 | 117484 | 13.1 | 6.3 | 4.4 |
|  |  |  |  |  |  |  |
|  |  |  |  |  |  |  |
|  |  |  |  |  |  |  |
| **208 loci-P3 run2** | *N*HC | *N*HCG | *N*HCGO | HCG-O | HC-G | HC |
| mean | 56236 | 41238 | 95806 | 12.5 | 6.0 | 3.9 |
| median | 55095 | 40967 | 95247 | 12.5 | 6.0 | 3.9 |
| S.D. | 26445 |  |  |  |  |  |
| min |  |  |  |  |  |  |
| max |  |  |  |  |  |  |
| 0.025 | 33004 | 33149 | 75707 | 11.9 | 5.6 | 3.3 |
| 0.975 | 85314 | 50495 | 118832 | 13.1 | 6.3 | 4.4 |
| 2.5%HPD | 31065 | 33137 | 74803 | 12.0 | 5.6 | 3.3 |
| 97.5%HPD | 82338 | 50448 | 117582 | 13.1 | 6.3 | 4.4 |
|  |  |  |  |  |  |  |
|  |  |  |  |  |  |  |
|  |  |  |  |  |  |  |
| **208 loci-P4 run1** | *N*HC | *N*HCG | *N*HCGO | HCG-O | HC-G | HC |
| mean | 55856 | 41356 | 95164 | 12.6 | 6.0 | 3.9 |
| median | 54658 | 41132 | 94704 | 12.6 | 6.0 | 3.9 |
| S.D. | 26730 |  |  |  |  |  |
| min |  |  |  |  |  |  |
| max |  |  |  |  |  |  |
| 0.025 | 32766 | 33538 | 75691 | 12.0 | 5.6 | 3.3 |
| 0.975 | 85837 | 50566 | 117451 | 13.1 | 6.3 | 4.4 |
| 2.5%HPD | 30523 | 32736 | 75395 | 12.0 | 5.6 | 3.3 |
| 97.5%HPD | 82063 | 49670 | 117039 | 13.1 | 6.3 | 4.4 |
|  |  |  |  |  |  |  |
|  |  |  |  |  |  |  |
|  |  |  |  |  |  |  |
| **208 loci-P4 run2** | *N*HC | *N*HCG | *N*HCGO | HCG-O | HC-G | HC |
| mean | 56131 | 41368 | 95707 | 12.6 | 6.0 | 3.9 |
| median | 54876 | 41108 | 95082 | 12.6 | 6.0 | 3.9 |
| S.D. | 26616 |  |  |  |  |  |
| min |  |  |  |  |  |  |
| max |  |  |  |  |  |  |
| 0.025 | 33384 | 33526 | 76020 | 12.0 | 5.6 | 3.3 |
| 0.975 | 85399 | 50696 | 118783 | 13.1 | 6.3 | 4.4 |
| 2.5%HPD | 31492 | 33255 | 73651 | 12.0 | 5.6 | 3.3 |
| 97.5%HPD | 82719 | 50236 | 115839 | 13.1 | 6.3 | 4.4 |
|  |  |  |  |  |  |  |
|  |  |  |  |  |  |  |
|  |  |  |  |  |  |  |
| **208 loci-P5 run1** | *N*HC | *N*HCG | *N*HCGO | HCG-O | HC-G | HC |
| mean | 65608 | 41380 | 98832 | 12.5 | 6.0 | 3.7 |
| median | 63916 | 41108 | 98240 | 12.5 | 6.0 | 3.7 |
| S.D. | 32300 |  |  |  |  |  |
| min |  |  |  |  |  |  |
| max |  |  |  |  |  |  |
| 0.025 | 38394 | 33738 | 78339 | 11.9 | 5.6 | 3.1 |
| 0.975 | 100875 | 50224 | 121875 | 13.1 | 6.3 | 4.3 |
| 2.5%HPD | 36702 | 33467 | 78059 | 11.9 | 5.7 | 3.1 |
| 97.5%HPD | 98251 | 49870 | 121447 | 13.1 | 6.3 | 4.3 |
|  |  |  |  |  |  |  |
|  |  |  |  |  |  |  |
|  |  |  |  |  |  |  |
| **208 loci-P5 run2** | *N*HC | *N*HCG | *N*HCGO | HCG-O | HC-G | HC |
| mean | 65038 | 41427 | 99211 | 12.5 | 6.0 | 3.7 |
| median | 63308 | 41274 | 98569 | 12.5 | 6.0 | 3.7 |
| S.D. | 32338 |  |  |  |  |  |
| min |  |  |  |  |  |  |
| max |  |  |  |  |  |  |
| 0.025 | 38584 | 33585 | 79079 | 11.9 | 5.6 | 3.1 |
| 0.975 | 101445 | 50460 | 122418 | 13.1 | 6.3 | 4.3 |
| 2.5%HPD | 36721 | 33526 | 77961 | 11.9 | 5.7 | 3.1 |
| 97.5%HPD | 98213 | 50318 | 121069 | 13.1 | 6.3 | 4.3 |
