# Supplementary material for: In silico phylogenomics using complete genomes: a case study on the evolution of hominoids
Source: HighWire-hosted journal article supplement (doi:10.1101/gr.203950.115), 2016-07-19
Supplement: Supplemental_Table_S16.docx [file Supplemental_Table_S16.docx]

**Table S16.** Numbers of single-copy anonymous loci output by program ALFIE depending on user-specified distance thresholds. Idealized anonymous loci are loci that exhibit the properties of being single-copy in the genome, are selectively neutral, and genealogically independent of other sampled loci. Thus, before the program can be run, the user must indicate the minimum physical distance separating an anonymous locus and the nearest annotated genomic element (“Inter Gene” distance in base pairs or bp). This distance is chosen to minimize the possible indirect effects of natural selection acting on functional genomic sites (e.g., via hitch-hiking or background selection). The user must also input a minimum physical distance separating two sampled anonymous loci (“Inter AL” distance). This distance is chosen to find anonymous loci that are effectively unlinked from each other. A trade-off exists between larger inter-locus distances and numbers of loci found by the program.

| AL\GENE | **10 kb** | **50 kb** | **70 kb** | **100 kb** | **150 kb** | **200 kb** | **500 kb** | **700 kb** |
| --- | --- | --- | --- | --- | --- | --- | --- | --- |
| **10 kb** | 23,728 | 10,443 | 7,425 | 4,632 | 2,239 | 1,155 | 60 | 0 |
| **50 kb** | 12,066 | 5,169 | 3,659 | 2,269 | 1,086 | 566 | 24 | 0 |
| **70 kb** | 10,054 | 4,363 | 3,062 | 1,885 | 901 | 468 | 19 | 0 |
| **100 kb** | 8,247 | 3,676 | 2,555 | 1,575 | 748 | 391 | 15 | 0 |
| **150 kb** | 6,520 | 3,016 | 2,135 | 1,310 | 603 | 324 | 11 | 0 |
| **200 kb** | 5,514 | 2,638 | 1,893 | 1,187 | 530 | 292 | 10 | 0 |
| **500 kb** | 3,102 | 1,694 | 1,273 | 849 | 412 | 232 | 6 | 0 |
| **700 kb** | 2,484 | 1,419 | 1,096 | 738 | 381 | 213 | 6 | 0 |
