# Supplementary material for: In silico phylogenomics using complete genomes: a case study on the evolution of hominoids
Source: HighWire-hosted journal article supplement (doi:10.1101/gr.203950.115), 2016-07-19
Supplement: Supplemental_Table_S17.docx [file Supplemental_Table_S17.docx]

**Table S17.** Gamma prior probability distributions specified for Bayesian analyses. We used the Bayesian program BPP2.2 (Yang 2012) to estimate the ancestral population size parameters (**) and speciation times (**) using genome data for human (H), chimpanzee (C), gorilla (G), and orangutan (O). We specified gamma priors *G*(**, **) for each of the three population size parameters (see Yang 2012): **HC, **HCG, and **HCGO, which are the population size parameters for the human-chimpanzee, human-chimpanzee-gorilla, and human-chimpanzee-gorilla-orangutan ancestors, respectively. We also specified one gamma prior for the divergence time at the root node the presumed hominoid species tree (((H,C),G),O), which is the orangutan divergence from the lineage leading to humans: **HCG-O. Dirichlet priors are used by BPP2.2 to estimate the other two speciation times: **HC and **HC-G, which are the speciation times between H and C lineages and between HC ancestral vs. G lineage. We defined five different combinations of gamma priors “P1” to “P5” (see Materials and Methods for more details) in order to assess the sensitivity of our posterior results to choice of priors. We did not specify a “P6” prior because our analyses show that changing the divergence time prior does not influence the posterior results. Shown are each of the gamma hyper-parameters (**, **) for each prior and their associated mean values. The mean of a gamma distribution is **/** while its variance is **/*2* (Yang 2002). Variances are not shown. The means of the ancestral population size parameters were converted into demographic units by the following equation: ** = 4*N*e**, where *N*e is the ancestral effective population size and ** is the mutation rate calibration parameter. As with most previous comparable studies based on presumably neutral autosomal DNA sequences, we assumed ** = 10-9 substitutions/site/year. We also assumed the following ancestral generation times from (Schrago 2014): HC ancestor = 26.3 years, HCG ancestor = 21.2 years, and HCGO ancestor = 15.2 years. We converted the speciation time parameters into absolute time units using the following equation: ** = **, where ** is the speciation time in time units. We assumed the same mutation rate calibration as before and the prior means shown for **HCG-O are in millions of years ago (Mya).

| Prior combo | *G*(**, **)  ** parameters | *G*(**, **)  ** parameter | Prior mean *N*HC | Prior mean *N*HCG | Prior  mean *N*HCGO | Prior  mean **HCG-O |
| --- | --- | --- | --- | --- | --- | --- |
| P1 | (2, 2000) | *G*(4, 400) | 9,500 | 12,000 | 16,500 | 10 |
| P2 | (2, 2000) | *G*(4, 222) | 9,500 | 12,000 | 16,500 | 18 |
| P3 | (2, 500) | *G*(4, 400) | 38,000 | 47,000 | 66,000 | 10 |
| P4 | (2, 500) | *G*(4, 222) | 38,000 | 47,000 | 66,000 | 18 |
| P5 | (2, 120) | *G*(4, 222) | 158,500 | 196,500 | 274,000 | 10 |
